# Supplementary material for: A High-Coverage Yersinia pestis Genome from a Sixth-Century Justinianic Plague Victim
Source: PubMed Central journal article supplement — Mol Biol Evol. 2016 Aug 30;33(11):2911–23. doi: 10.1093/molbev/msw170 (PMC5062324; doi:10.1093/molbev/msw170), 2016-08-30
Supplement: supp_msw170_Supplementary_revised.pdf [file supp_msw170_Supplementary_revised.pdf]

# Supplementary material

## Contents

|                                                                                                                                                                                                                         |    |
|-------------------------------------------------------------------------------------------------------------------------------------------------------------------------------------------------------------------------|----|
| Supplementary Tables.....                                                                                                                                                                                               | 2  |
| Table S1: Results of conventional PCR and sequencing pre-screening on the <i>Y. pestis</i> specific <i>pla</i> fragment (133 bp) .....                                                                                  | 2  |
| Table S2: Carbon-dating .....                                                                                                                                                                                           | 3  |
| Table S3: Copy number estimation of plasmids .....                                                                                                                                                                      | 3  |
| Table S4: Genomes used for SNP calling and phylogeny .....                                                                                                                                                              | 3  |
| Table S5: 157 chromosomal SNPs called for the Altenerding genome compared to the CO92 reference.....                                                                                                                    | 7  |
| Table S6: 11 SNPs called for plasmids pCD1 and pMT1 .....                                                                                                                                                               | 14 |
| Table S7: SNPs published by <i>Wagner et al.</i> for the Aschheim genome not called in the Altenerding genome .....                                                                                                     | 14 |
| Table S8: 19 potential false positive SNPs called by <i>Wagner et al.</i> .....                                                                                                                                         | 20 |
| Table S9: 63 Unique SNPs in the Altenerding genome cross-referenced against data set .....                                                                                                                              | 20 |
| Table S10: Non-synonymous SNPs compared to CO92.....                                                                                                                                                                    | 23 |
| Table S11: Regions missing in CO92 but present in the Altenerding genome .....                                                                                                                                          | 27 |
| Supplementary figures.....                                                                                                                                                                                              | 29 |
| Fig.S1: <i>pla</i> gene qPCR amplification and melting curves used for sample screening                                                                                                                                 | 29 |
| Fig.S2: mapDamage plot based on the non-UDG treated Altenerding library mapped to the CO92 chromosome reference .....                                                                                                   | 30 |
| Fig.S3: mapDamage plot based on the non-UDG treated Altenerding library mapped to the human hg19 reference .....                                                                                                        | 30 |
| Fig.S4: Maximum Parsimony tree excluding the Aschheim genome .....                                                                                                                                                      | 31 |
| Fig.S5: Maximum Likelihood tree excluding the Aschheim genome.....                                                                                                                                                      | 32 |
| Fig.S6: Maximum Likelihood tree .....                                                                                                                                                                                   | 33 |
| Fig.S7 (A-S): Visualization of positions containing potential false positive SNPs called by <i>Wagner et al.</i> 2014 .....                                                                                             | 43 |
| Fig. S8 ( A-K): Visualization of the abnormal coverage peaks in the re-analyzed Aschheim SNP enriched data and non-SNP enriched data, containing potential false positive SNPs called by <i>Wagner et al.</i> 2014..... | 53 |

Fig. S9 (A-J): Visualization of 10 positions containing true SNPs called for the re-analyzed Aschheim genome as well as for the Altenerding genome..... 58

Fig.S10 (A-H): Visualization of positions containing potential false positive SNPs specifically derived in the re-analyzed Aschheim genome ..... 64

Fig.S11: Genome-wide SNP allele frequency plot of the re-analyzed Aschheim genome ..... 66

Fig.S12: Coverage plots across the CO92 reference for the Altenerding genome ..... 67

Supplementary archaeological and historical information..... 68

References ..... 69

## Supplementary Tables

**Table S1: Results of conventional PCR and sequencing pre-screening on the *Y. pestis* specific *pla* fragment (133 bp)**

| Individual | Tooth sample 1 | Tooth sample 2 |
|------------|----------------|----------------|
| AE96       | -              | -              |
| AE97       | -              | -              |
| AE127      | -              | -              |
| AE128      | -              | -              |
| AE349      | -              | -              |
| AE350      | -              | -              |
| AE468      | -              | -              |
| AE469      | -              | -              |
| AE887      | -              | -              |
| AE888      | -              | -              |
| AE1004     | -              | -              |
| AE1005     | -              | -              |
| AE1154     | -              | -              |
| AE1155     | -              | -              |
| AE1175     | -              | +              |
| AE1176     | +              | -              |

|        |   |   |
|--------|---|---|
| AE1184 | - | - |
| AE1185 | - | - |
| AE1223 | - | - |
| AE1241 | - | - |

**Table S2: Carbon-dating**

| Individual | Sample     | C14 date | +/- | Cal 1 sigma       | Cal 2 sigma       | C:N              | %C                | percent collagen  |
|------------|------------|----------|-----|-------------------|-------------------|------------------|-------------------|-------------------|
| AE1175     | metacarpal | 1541     | 19  | Cal AD<br>434-556 | Cal AD<br>428-571 | 3.3 <sup>a</sup> | 37.8 <sup>a</sup> | 13.8 <sup>a</sup> |
| AE1176     | metacarpal | 1563     | 20  | Cal AD<br>430-538 | Cal AD<br>426-545 | 3.3 <sup>a</sup> | 36.1 <sup>a</sup> | 3.4 <sup>a</sup>  |

<sup>a</sup> The C:N relation, percent C and percent collagen values are in the normal range and show a good collagen quality.

**Table S3: Copy number estimation of plasmids**

|                                                              | Chromosome           | pCD1        | pMT1        |
|--------------------------------------------------------------|----------------------|-------------|-------------|
| Reference sequence (CO92)                                    | NC_003143.1          | NC_003131.1 | NC_003134.1 |
| Average read length                                          | 67.41 bp             | 68.7 bp     | 61 bp       |
| Selected region of full mappability (positions in reference) | 2306929 -<br>2311929 | 24206-29205 | 2000-6999   |
| "G+C" content in region of full mappability                  | 48.04 %              | 47.98 %     | 47.96 %     |
| Average coverage in region of full mappability               | 21.2 X               | 60.8 X      | 54 X        |
| Estimated copy number <sup>a</sup>                           | -                    | 2.87        | 2.55        |

<sup>a</sup> The copy number of the plasmids was estimated on the average coverage in the region of full mappability divided by that of the chromosome, and is likely to be affected by ascertainment bias in the array capture.

**Table S4: Genomes used for SNP calling and phylogeny**

| Strain ID         | SNP Calls | Coverage (fold) | Coverage (percent) | accession          |
|-------------------|-----------|-----------------|--------------------|--------------------|
| 0.ANT1a_42013     | 162       | 63.19           | 93.93              | ADPG00000000 47685 |
| 0.ANT1b_CMCC49003 | 172       | 66.88           | 94.59              | ADQX00000000 47685 |
| 0.ANT1c_945       | 185       | 50.49           | 92.05              | ADPV00000000 47685 |
| 0.ANT1d_164       | 179       | 47.76           | 93.37              | ADOW00000000 47685 |
| 0.ANT1e_CMCC8211  | 188       | 55.41           | 94.27              | ADRD00000000 47685 |
| 0.ANT1f_42095     | 185       | 47.24           | 93.98              | ADPJ00000000 47685 |
| 0.ANT1g_CMCC42007 | 185       | 53.09           | 93.43              | ADQV00000000 47685 |

|                         |     |       |       |                    |
|-------------------------|-----|-------|-------|--------------------|
| 0.ANT1h_CMCC43032       | 182 | 38.54 | 93.05 | ADQW00000000 47685 |
| 0.ANT2_B42003004        | 90  | 94.52 | 95.25 | NZ_AAYU00000000    |
| 0.ANT2a_2330            | 90  | 66.53 | 92.44 | ADQY00000000 47685 |
| 0.ANT3a_CMCC38001       | 93  | 67.2  | 93.74 | ADQU00000000 47685 |
| 0.ANT3b_A1956001        | 91  | 66.62 | 93.98 | ADPX00000000 47685 |
| 0.ANT3c_42082           | 92  | 27.29 | 92.06 | ADPH00000000 47685 |
| 0.ANT3d_CMCC21106       | 99  | 42.78 | 91.74 | ADQP00000000 47685 |
| 0.ANT3e_42091b          | 98  | 85.13 | 93.89 | ADPI00000000 47685 |
| 0.PE2_PEST-F            | 507 | 92.06 | 93.07 | NC_009381          |
| 0.PE2b_G8786            | 567 | 51.87 | 91.33 | ADSG00000000 47685 |
| 0.PE3_Angola            | 889 | 89.73 | 91.04 | NC_010159          |
| 0.PE4_Microtus91001     | 351 | 93.27 | 94.25 | NC_005810          |
| 0.PE4Aa_12              | 267 | 49.15 | 92.27 | ADOV00000000 47685 |
| 0.PE4Ab_9               | 264 | 46.84 | 93.04 | ADPT00000000 47685 |
| 0.PE4Ba_PestoidesA      | 315 | 93.44 | 94.42 | NZ_ACNT00000000    |
| 0.PE4Ca_CMCCN01002<br>5 | 325 | 61.42 | 92.9  | ADRT00000000 47685 |
| 0.PE4Cb_M0000002        | 316 | 49.02 | 93.05 | ADST00000000 47685 |
| 0.PE4Cc_CMCC18019       | 322 | 35.08 | 93.45 | ADQO00000000 47685 |
| 0.PE4Cd_CMCC93014       | 331 | 52.98 | 94.06 | ADRM00000000 47685 |
| 0.PE4Ce_CMCC91090       | 333 | 87.7  | 93.18 | ADRJ00000000 47685 |
| 0.PE7b_620024           | 444 | 38.79 | 92.68 | ADPM00000000 47685 |
| 1.ANT1_Antiqua          | 156 | 93.95 | 94.9  | NC_008150          |
| 1.ANT1_UG05-0454        | 163 | 91.51 | 92.34 | NZ_AAYR00000000    |
| 1.IN1a_CMCC11001        | 48  | 52.46 | 93.59 | ADQK00000000 47685 |
| 1.IN1b_780441           | 51  | 54.96 | 94.66 | ADPS00000000 47685 |
| 1.IN1c_K21985002        | 62  | 60.58 | 92.21 | ADSS00000000 47685 |
| 1.IN2a_CMCC640047       | 43  | 45.14 | 92.33 | ADRA00000000 47685 |
| 1.IN2b_30017            | 46  | 89.81 | 94.69 | ADPC00000000 47685 |
| 1.IN2c_CMCC31004        | 46  | 56.78 | 92.84 | ADQR00000000 47685 |
| 1.IN2d_C1975003         | 40  | 49.75 | 92.45 | ADPZ00000000 47685 |
| 1.IN2e_C1989001         | 50  | 47.25 | 95.07 | ADQB00000000 47685 |
| 1.IN2f_710317           | 49  | 42.58 | 94.17 | ADPP00000000 47685 |
| 1.IN2g_CMCC05013        | 50  | 24.84 | 93.45 | ADQF00000000 47685 |
| 1.IN2h_5                | 49  | 36.98 | 93.36 | ADPK00000000 47685 |
| 1.IN2i_CMCC10012        | 53  | 59.62 | 93.98 | ADQG00000000 47685 |
| 1.IN2j_CMCC27002        | 54  | 46.36 | 92.45 | ADQQ00000000 47685 |
| 1.IN2k_970754           | 55  | 61.24 | 93.04 | ADPW00000000 47685 |
| 1.IN2l_D1991004         | 52  | 38.21 | 94.56 | ADRX00000000 47685 |
| 1.IN2m_D1964002b        | 53  | 76.63 | 94.7  | ADRV00000000 47685 |
| 1.IN2n_CMCC02041        | 56  | 62.95 | 94.48 | ADQC00000000 47685 |
| 1.IN2o_CMCC03001        | 54  | 41.46 | 92.42 | ADQD00000000 47685 |

|                     |     |       |       |                    |
|---------------------|-----|-------|-------|--------------------|
| 1.IN2p_D1982001     | 50  | 47.49 | 93.11 | ADRW00000000 47685 |
| 1.IN2q_D1964001     | 52  | 33.69 | 92.63 | ADRU00000000 47685 |
| 1.IN3a_F1954001     | 48  | 60.11 | 95.31 | ADSC00000000 47685 |
| 1.IN3b_E1979001     | 44  | 40.72 | 94.92 | NZ_AAYV00000000    |
| 1.IN3c_CMCC84038b   | 45  | 70.76 | 94.72 | ADRF00000000 47685 |
| 1.IN3d_YN1683       | 46  | 32.63 | 93.19 | ADTD00000000 47685 |
| 1.IN3e_YN472        | 44  | 57.37 | 95.34 | ADTH00000000 47685 |
| 1.IN3f_YN1065       | 45  | 60.74 | 94.36 | ADTC00000000 47685 |
| 1.IN3g_E1977001     | 45  | 50.42 | 93.47 | ADRY00000000 47685 |
| 1.IN3h_CMCC84033    | 44  | 38.97 | 94    | ADRE00000000 47685 |
| 1.IN3i_CMCC84046    | 48  | 66.26 | 95.35 | ADRG00000000 47685 |
| 1.ORI1_CA88         | 13  | 94.97 | 95.69 | NZ_ABCD00000000    |
| 1.ORI1_CO92         | 0   | 95.06 | 95.74 | NC_003143          |
| 1.ORI1a_CMCC114001  | 26  | 44.58 | 92.37 | ADQL00000000 47685 |
| 1.ORI1b_India195    | 28  | 92.74 | 93.47 | NZ_ACNR00000000    |
| 1.ORI1c_F1946001    | 34  | 42.44 | 94.74 | ADSB00000000 47685 |
| 1.ORI2_F1991016     | 40  | 94.5  | 95.2  | NZ_ABAT00000000    |
| 1.ORI2a_YN2179      | 41  | 40.78 | 92.33 | ADTE00000000 47685 |
| 1.ORI2c_YN2551b     | 42  | 44.84 | 94.5  | ADTF00000000 47685 |
| 1.ORI2d_YN2588      | 40  | 48.06 | 91.99 | ADTG00000000 47685 |
| 1.ORI2f_CMCC87001   | 38  | 59.25 | 94.71 | ADRH00000000 47685 |
| 1.ORI2g_F1984001    | 40  | 42.89 | 92.63 | ADSD00000000 47685 |
| 1.ORI2h_YN663       | 38  | 56.2  | 92.37 | ADTI00000000 47685 |
| 1.ORI2i_CMCC100001a | 38  | 70.87 | 95.36 | ADRR00000000 47685 |
| 1.ORI2i_CMCC110001b | 39  | 50.54 | 92.56 | ADRS00000000 47685 |
| 1.ORI3_IP275        | 42  | 94.47 | 95.21 | NZ_AAOS00000000    |
| 1.ORI3_MG05-1020    | 34  | 94.73 | 95.36 | NZ_AAYS00000000    |
| 1.ORI3a_EV76        | 30  | 50.95 | 91.01 | ADSA00000000 47685 |
| 2.ANT1_Nepal516     | 138 | 91.87 | 92.7  | NZ_ACNQ00000000    |
| 2.ANT1a_34008       | 122 | 61.73 | 92.57 | ADPD00000000 47685 |
| 2.ANT1b_34202       | 122 | 53.84 | 93.97 | ADPE00000000 47685 |
| 2.ANT2a_2           | 117 | 52.78 | 93.05 | ADOX00000000 47685 |
| 2.ANT2b_351001      | 121 | 40.92 | 92.98 | ADPF00000000 47685 |
| 2.ANT2c_CMCC347001  | 119 | 32.57 | 93.87 | ADQS00000000 47685 |
| 2.ANT2d_G1996006    | 117 | 56.48 | 94.12 | ADSE00000000 47685 |
| 2.ANT2e_G1996010    | 121 | 68.03 | 94.21 | ADSF00000000 47685 |
| 2.ANT2f_CMCC348002  | 120 | 57.17 | 94.3  | ADQT00000000 47685 |
| 2.ANT3a_CMCC92010   | 128 | 60.52 | 91.48 | ADRL00000000 47685 |
| 2.ANT3b_CMCC95001   | 126 | 49.74 | 92.38 | ADRN00000000 47685 |
| 2.ANT3c_CMCC96001   | 127 | 74.21 | 94.22 | ADRO00000000 47685 |
| 2.ANT3d_CMCC96007   | 129 | 69.28 | 92.53 | ADRP00000000 47685 |
| 2.ANT3e_CMCC67001   | 137 | 62.64 | 91.29 | ADRB00000000 47685 |

|                         |     |        |       |                          |
|-------------------------|-----|--------|-------|--------------------------|
| 2.ANT3f_CMCC104003      | 126 | 71.42  | 93.99 | ADQH00000000 47685       |
| 2.ANT3g_CMCC51020       | 127 | 50.32  | 93.12 | ADQY00000000 47685       |
| 2.ANT3h_CMCC106002      | 126 | 68.1   | 93.94 | ADQI00000000 47685       |
| 2.ANT3i_CMCC64001       | 133 | 56.49  | 91.43 | ADQZ00000000 47685       |
| 2.ANT3j_H1959004        | 124 | 51.89  | 93.69 | ADSI00000000 47685       |
| 2.ANT3k_5761            | 131 | 52.31  | 91.38 | ADPL00000000 47685       |
| 2.ANT3l_735             | 135 | 49.37  | 92.53 | ADPR00000000 47685       |
| 2.MED1b_2506            | 158 | 70.57  | 93.99 | ADPA00000000 47685       |
| 2.MED1c_2654            | 157 | 29     | 93.57 | ADPB00000000 47685       |
| 2.MED1d_2504            | 158 | 37.87  | 92.65 | ADOZ00000000 47685       |
| 2.MED2_KIM10            | 171 | 93.81  | 94.65 | NC_004088                |
| 2.MED2b_91              | 131 | 77.47  | 91.46 | ADPU00000000 47685       |
| 2.MED2c_K11973002       | 129 | 59.49  | 93.09 | NZ_AAYT00000000          |
| 2.MED2d_A1973001        | 129 | 31.97  | 91.78 | ADPY00000000 47685       |
| 2.MED2e_7338            | 132 | 62.53  | 90.23 | ADPQ00000000 47685       |
| 2.MED3a_J1963002        | 134 | 51.58  | 93.19 | ADSP00000000 47685       |
| 2.MED3b_CMCC125002<br>b | 134 | 49.53  | 93.86 | ADQN00000000 47685       |
| 2.MED3c_I1969003        | 133 | 73.87  | 93.97 | ADSK00000000 47685       |
| 2.MED3d_J1978002        | 122 | 60.65  | 94.71 | ADSQ00000000 47685       |
| 2.MED3f_I1970005        | 139 | 46.96  | 93.47 | ADSL00000000 47685       |
| 2.MED3g_CMCC99103       | 136 | 41.71  | 93.66 | ADRQ00000000 47685       |
| 2.MED3h_CMCC90027       | 136 | 50.58  | 91.2  | ADRI00000000 47685       |
| 2.MED3i_CMCC92004       | 140 | 42.18  | 91.35 | ADRK00000000 47685       |
| 2.MED3j_I2001001        | 137 | 78.49  | 94.82 | ADSO00000000 47685       |
| 2.MED3k_CMCC12003       | 138 | 51.11  | 91.09 | ADQM00000000 47685       |
| 2.MED3l_I1994006        | 141 | 62.9   | 93.9  | ADSN00000000 47685       |
| 2.MED3m_SHAN11          | 142 | 51.92  | 92.72 | ADTA00000000 47685       |
| 2.MED3n_SHAN12          | 142 | 42.92  | 93.19 | ADTB00000000 47685       |
| 2.MED3o_I1991001        | 140 | 48.81  | 91.82 | ADSM00000000 47685       |
| 2.MED3p_CMCC107004      | 141 | 100.25 | 94.78 | ADQJ00000000 47685       |
| 3.ANT1a_7b              | 96  | 65.01  | 94.49 | ADPN00000000 47685       |
| 3.ANT1b_CMCC71001       | 95  | 42     | 92.33 | ADRC00000000 47685       |
| 3.ANT1c_C1976001        | 92  | 59.96  | 95.27 | ADQA00000000 47685       |
| 3.ANT1d_71021           | 94  | 44.74  | 94.2  | ADPO00000000 47685       |
| 3.ANT2a_MGJZ6           | 112 | 54.85  | 91.3  | ADSX00000000 47685       |
| 3.ANT2b_MGJZ7           | 107 | 40.09  | 91.68 | ADSY00000000 47685       |
| 3.ANT2c_MGJZ9           | 111 | 56.22  | 93.67 | ADSZ00000000 47685       |
| 3.ANT2d_MGJZ11          | 113 | 53.19  | 94.25 | ADSU00000000 47685       |
| 3.ANT2e_MGJZ3           | 111 | 63.11  | 93.09 | ADSW00000000 47685       |
| 4.ANT1a_MGJZ12          | 94  | 55.06  | 93.32 | ADSV00000000 47685       |
| BD 8124_8291_11972      | 65  | 16.7   | 88.07 | SRR341963,<br>SRR341961, |

|                                  |           |       |       |            |
|----------------------------------|-----------|-------|-------|------------|
|                                  |           |       |       | SRR341962  |
| Altenerding                      | 157       | 17.9  | 91.5  | PRJEB14851 |
| Aschheim                         | 120       | 3.94  | 30.24 | SRP033879  |
| Y. pseudotuberculosis (outgroup) | 1238<br>9 | 88.08 | 91.16 | NC_006155  |

**Table S5: 157 chromosomal SNPs called for the Altenerding genome compared to the CO92 reference (5X coverage and SNP allele frequency of at least 90%)**

| Position | CO92 | Altenerding | Coverage in Altenerding | Ancestral/Derived | SNP type       |
|----------|------|-------------|-------------------------|-------------------|----------------|
| 74539    | C    | T           | 31                      | Anc               | non-synonymous |
| 86824*   | A    | G           | 8                       | der               | intergenic     |
| 130643   | G    | A           | 24                      | Anc               | non-synonymous |
| 155747*  | A    | G           | 20                      | Anc               | synonymous     |
| 189227*  | C    | T           | 19                      | Anc               | non-synonymous |
| 189912*  | A    | G           | 18                      | der               | intergenic     |
| 228268   | T    | G           | 31                      | Anc               | synonymous     |
| 260148*  | C    | T           | 15                      | der               | non-synonymous |
| 271114*  | C    | A           | 19                      | der               | non-synonymous |
| 286528*  | T    | A           | 17                      | Anc               | synonymous     |
| 325836   | T    | C           | 24                      | Anc               | synonymous     |
| 341720   | A    | G           | 19                      | Anc               | non-synonymous |
| 399533   | C    | A           | 17                      | Anc               | non-synonymous |
| 420208*  | G    | T           | 7                       | Anc               | intergenic     |
| 485976*  | C    | T           | 15                      | der               | synonymous     |
| 545488   | T    | C           | 25                      | Anc               | stop lost      |
| 547131   | T    | G           | 18                      | Anc               | synonymous     |

|          |   |   |    |     |                |
|----------|---|---|----|-----|----------------|
| 549767*  | T | C | 10 | Anc | intergenic     |
| 557841*  | C | T | 14 | der | non-synonymous |
| 699494   | A | G | 22 | Anc | synonymous     |
| 699647   | T | C | 22 | Anc | synonymous     |
| 727741   | G | A | 14 | der | non-synonymous |
| 779365*  | C | T | 17 | der | synonymous     |
| 877258   | T | C | 26 | Anc | non-synonymous |
| 898980   | A | T | 11 | der | intergenic     |
| 918790   | C | T | 13 | Anc | non-synonymous |
| 1017647  | T | C | 16 | Anc | synonymous     |
| 1025278  | T | G | 20 | Anc | non-synonymous |
| 1051913  | A | G | 26 | Anc | non-synonymous |
| 1067966  | C | A | 20 | der | non-synonymous |
| 1098675* | A | C | 15 | Anc | non-synonymous |
| 1102174  | A | G | 14 | Anc | non-synonymous |
| 1178178  | T | C | 9  | Anc | intergenic     |
| 1178459  | T | C | 28 | Anc | synonymous     |
| 1211729* | A | C | 18 | der | synonymous     |
| 1251046  | T | C | 10 | Anc | non-synonymous |
| 1263337  | G | A | 5  | Anc | intergenic     |
| 1272559  | T | C | 16 | Anc | non-synonymous |
| 1296743* | C | T | 27 | der | non-synonymous |
| 1306718  | T | C | 17 | Anc | intergenic     |



|          |   |   |    |     |                |
|----------|---|---|----|-----|----------------|
| 1385780  | T | C | 23 | Anc | synonymous     |
| 1387701* | C | T | 13 | der | intergenic     |
| 1387756* | A | G | 16 | der | intergenic     |
| 1413031* | C | A | 8  | der | intergenic     |
| 1434752* | C | A | 16 | der | non-synonymous |
| 1489055  | C | T | 31 | der | synonymous     |
| 1512930  | A | G | 17 | Anc | non-synonymous |
| 1530658  | C | A | 12 | der | non-synonymous |
| 1540754  | A | G | 17 | Anc | synonymous     |
| 1609461* | T | C | 14 | der | non-synonymous |
| 1705810  | A | C | 14 | Anc | non-synonymous |
| 1735263  | A | C | 26 | Anc | synonymous     |
| 1749443  | T | C | 15 | Anc | synonymous     |
| 1754708  | C | T | 22 | der | non-synonymous |
| 1804559  | C | T | 12 | Anc | synonymous     |
| 1808946  | T | C | 19 | Anc | intergenic     |
| 1859946* | T | C | 15 | Anc | non-synonymous |
| 1868678  | G | T | 11 | der | intergenic     |
| 1871476  | G | A | 10 | Anc | intergenic     |
| 1956162  | T | C | 9  | der | intergenic     |
| 2012524  | T | G | 19 | Anc | non-synonymous |
| 2022335  | A | C | 16 | Anc | intergenic     |
| 2092152* | C | T | 21 | der | synonymous     |

|          |   |   |    |     |                |
|----------|---|---|----|-----|----------------|
| 2097520  | G | T | 22 | der | synonymous     |
| 2098628  | T | C | 16 | Anc | non-synonymous |
| 2262577  | T | G | 31 | Anc | non-synonymous |
| 2277583  | G | A | 8  | Anc | intergenic     |
| 2278317  | A | G | 20 | Anc | non-synonymous |
| 2300659  | T | G | 23 | Anc | non-synonymous |
| 2352174* | T | G | 17 | der | non-synonymous |
| 2356003  | T | A | 20 | Anc | non-synonymous |
| 2419529* | G | A | 25 | der | synonymous     |
| 2495165* | C | A | 8  | der | intergenic     |
| 2508389  | T | C | 22 | Anc | non-synonymous |
| 2655012  | C | T | 13 | Anc | intergenic     |
| 2656129* | T | G | 20 | Anc | synonymous     |
| 2684793  | A | G | 18 | Anc | intergenic     |
| 2721828  | C | A | 16 | Anc | synonymous     |
| 2725715  | C | T | 11 | der | intergenic     |
| 2739149  | C | A | 13 | Anc | synonymous     |
| 2744933  | A | G | 9  | Anc | non-synonymous |
| 2753572* | A | T | 14 | der | synonymous     |
| 2773647  | A | G | 18 | Anc | non-synonymous |
| 2797988* | A | G | 13 | Anc | synonymous     |
| 2812384  | G | T | 18 | Anc | non-synonymous |
| 2829833  | A | G | 32 | Anc | non-synonymous |

|          |   |   |    |     |                |
|----------|---|---|----|-----|----------------|
| 2903882  | T | G | 18 | Anc | non-synonymous |
| 2934972  | C | G | 22 | Anc | synonymous     |
| 2936268  | G | A | 18 | Anc | non-synonymous |
| 2950954  | G | A | 11 | Anc | non-synonymous |
| 2958327  | C | T | 23 | Anc | intergenic     |
| 2977542* | C | A | 26 | der | non-synonymous |
| 2995771  | A | G | 8  | Anc | intergenic     |
| 3078807* | C | A | 21 | der | non-synonymous |
| 3085079  | A | G | 16 | Anc | non-synonymous |
| 3096319  | G | A | 17 | Anc | non-synonymous |
| 3145523  | A | C | 22 | Anc | non-synonymous |
| 3179828* | C | A | 30 | der | synonymous     |
| 3190399  | A | G | 35 | Anc | non-synonymous |
| 3210101  | A | G | 18 | Anc | synonymous     |
| 3223359* | C | A | 5  | Anc | intergenic     |
| 3244204  | A | G | 26 | Anc | non-synonymous |
| 3267118* | A | G | 16 | Anc | non-synonymous |
| 3274298* | A | T | 8  | der | synonymous     |
| 3324959  | A | G | 18 | Anc | intergenic     |
| 3360963* | A | C | 14 | der | non-synonymous |
| 3360984* | C | T | 6  | der | non-synonymous |
| 3362591  | A | G | 18 | Anc | non-synonymous |
| 3397040* | A | G | 16 | Anc | synonymous     |

|          |   |   |    |     |                |
|----------|---|---|----|-----|----------------|
| 3398153  | G | A | 12 | der | synonymous     |
| 3409414  | T | C | 5  | der | intergenic     |
| 3421335  | A | G | 10 | Anc | non-synonymous |
| 3426560* | A | G | 20 | Anc | synonymous     |
| 3442617* | A | T | 15 | Anc | non-synonymous |
| 3500922  | T | G | 20 | der | non-synonymous |
| 3535148* | G | T | 11 | der | non-synonymous |
| 3560088  | G | A | 31 | der | non-synonymous |
| 3564026  | C | T | 24 | Anc | non-synonymous |
| 3568597  | C | T | 23 | der | non-synonymous |
| 3571531  | A | G | 30 | Anc | synonymous     |
| 3616733  | A | G | 17 | Anc | non-synonymous |
| 3645151* | C | G | 20 | Anc | non-synonymous |
| 3658233* | T | G | 12 | Anc | non-synonymous |
| 3667806  | A | G | 13 | Anc | non-synonymous |
| 3726726  | A | G | 18 | Anc | stop lost      |
| 3750736  | G | A | 16 | der | intergenic     |
| 3755861  | C | T | 7  | der | intergenic     |
| 3767613  | C | T | 11 | Anc | intergenic     |
| 3806677  | C | T | 12 | Anc | non-synonymous |
| 3843195  | C | A | 5  | der | synonymous     |
| 3892488* | C | T | 21 | Anc | non-synonymous |
| 3973746  | C | T | 27 | Anc | non-synonymous |

|          |   |   |    |     |                |
|----------|---|---|----|-----|----------------|
| 4066494* | C | T | 22 | der | non-synonymous |
| 4080579  | T | C | 19 | Anc | non-synonymous |
| 4081612  | T | C | 17 | Anc | intergenic     |
| 4082562* | T | C | 21 | Anc | synonymous     |
| 4083536  | A | G | 19 | Anc | intergenic     |
| 4087224  | T | C | 28 | Anc | intergenic     |
| 4173149  | A | C | 6  | Anc | intergenic     |
| 4194600  | G | A | 21 | Anc | non-synonymous |
| 4243823  | A | T | 9  | Anc | non-synonymous |
| 4307755  | G | A | 25 | der | non-synonymous |
| 4339366  | T | G | 21 | Anc | non-synonymous |
| 4371886* | A | G | 19 | Anc | synonymous     |
| 4399470  | A | G | 29 | Anc | non-synonymous |
| 4412624* | A | G | 12 | der | intergenic     |
| 4421633  | T | C | 36 | Anc | non-synonymous |
| 4421689  | A | G | 32 | Anc | non-synonymous |
| 4423366* | G | A | 38 | der | synonymous     |
| 4460688  | C | T | 18 | der | non-synonymous |
| 4465967  | C | A | 24 | der | synonymous     |
| 4518401  | G | A | 18 | Anc | synonymous     |
| 4527483  | A | G | 14 | Anc | intergenic     |
| 4579183  | A | G | 20 | Anc | non-synonymous |
| 4628496  | C | A | 13 | der | synonymous     |

|         |   |   |    |     |                |
|---------|---|---|----|-----|----------------|
| 4629169 | G | A | 33 | der | intergenic     |
| 4634287 | A | G | 13 | Anc | non-synonymous |

\* Chromosomal SNPs detected in the Altenerding genome that were not called in the Wagner et al. Aschheim genome.

**Table S6: 11 SNPs called for plasmids pCD1 and pMT1 (5X coverage and SNP frequency of 90% minimum).**

| Plasmid            | Position | CO92 | Altenerding | Coverage |
|--------------------|----------|------|-------------|----------|
| pCD1 (NC_003131.1) | 23564    | T    | G           | 67       |
|                    | 29959    | A    | G           | 40       |
|                    | 50462    | T    | C           | 33       |
|                    | 54237    | T    | G           | 44       |
|                    | 55839    | G    | A           | 53       |
|                    | 66608    | C    | T           | 83       |
| pMT1 (NC_003134.1) | 12976*   | A    | C           | 70       |
|                    | 32569    | T    | G           | 82       |
|                    | 47365    | C    | T           | 79       |
|                    | 62994    | T    | C           | 90       |
|                    | 82435    | C    | T           | 99       |

\* pMT1 SNP detected in the Altenerding genome and not called in the Wagner et al. Aschheim genome.

**Table S7: SNPs published by Wagner et al. for the Aschheim genome that were not called in the Altenerding genome**

| Position in CO92 | CO92 | Altenerding | Coverage in Altenerding | Aschheim genome published in Wagner et al. | Coverage in the Aschheim genome published in Wagner et al. | Re-analyzed Aschheim genome | Coverage in the re-analyzed Aschheim genome | Variant frequency in the re-analyzed Aschheim genome (%) | Reason SNP was not called in the Altenerding genome |
|------------------|------|-------------|-------------------------|--------------------------------------------|------------------------------------------------------------|-----------------------------|---------------------------------------------|----------------------------------------------------------|-----------------------------------------------------|
| 105187           | A    | C           | 17                      | C                                          | 19                                                         | C                           | 14                                          | 100                                                      | Excluded non-core region                            |
| 107738           | A    | G           | 14                      | G                                          | 13                                                         | G                           | 10                                          | 100                                                      | Excluded non-                                       |

|         |   |     |    |   |     |     |    |     |                                                                                                      |
|---------|---|-----|----|---|-----|-----|----|-----|------------------------------------------------------------------------------------------------------|
|         |   |     |    |   |     |     |    |     | core region                                                                                          |
| 221811  | A | A   | 24 | G | 63  | G   | 7  | 70  | Potential false positive in Wagner et al.: heterogeneous position with abnormal cover peak in region |
| 225902  | A | A   | 16 | T | 6   | N/A | 0  | 0   | Potential false positive in Wagner et al.: position not covered in the re-analysis of Wagner et al.  |
| 333342  | A | A   | 22 | G | 46  | G   | 5  | 63  | Potential false positive in Wagner et al.: heterogeneous position with abnormal cover peak in region |
| 417323  | G | A   | 3  | A | 30  | A   | 18 | 100 | Excluded non-core region                                                                             |
| 442439  | T | C   | 19 | C | 46  | C   | 33 | 100 | Excluded non-core region                                                                             |
| 497800  | T | T   | 17 | A | 122 | A   | 13 | 72  | False positive in Wagner et al.: heterogeneous position with abnormal cover peak in region           |
| 567757  | C | A   | 2  | A | 6   | A   | 6  | 100 | Excluded non-core region                                                                             |
| 698477  | C | A   | 19 | A | 21  | A   | 15 | 100 | Excluded non-core region                                                                             |
| 754287  | T | C   | 13 | C | 18  | C   | 13 | 100 | Excluded non-core region                                                                             |
| 773110  | T | C   | 17 | C | 24  | C   | 13 | 100 | Excluded non-core region                                                                             |
| 809132  | A | G   | 15 | G | 13  | G   | 9  | 100 | Excluded non-core region                                                                             |
| 1044488 | A | N/A | 0  | G | 23  | G   | 17 | 100 | Less than 5X coverage in Altenerding                                                                 |
| 1137603 | G | T   | 13 | T | 6   | T   | 2  | 100 | Excluded non-core region                                                                             |

|         |   |     |    |   |     |   |    |     |                                                                                                      |
|---------|---|-----|----|---|-----|---|----|-----|------------------------------------------------------------------------------------------------------|
| 1138676 | G | T   | 22 | T | 6   | T | 5  | 83  | Excluded non-core region                                                                             |
| 1237756 | C | N/A | 0  | T | 8   | T | 3  | 100 | Less than 5X coverage in Altendering                                                                 |
| 1371020 | C | C   | 17 | A | 8   | C | 1  | 100 | Potential false positive in Wagner et al.: SNP does not exist in the re-analysis of Wagner et al.    |
| 1371025 | C | C   | 18 | T | 24  | T | 6  | 86  | False positive in Wagner et al.: heterogeneous position with abnormal cover peak in region           |
| 1440494 | A | C   | 29 | C | 12  | C | 11 | 100 | Excluded non-core region                                                                             |
| 1444672 | A | G   | 2  | G | 9   | G | 7  | 88  | Less than 5X coverage in Altendering                                                                 |
| 1796044 | T | C   | 14 | C | 16  | C | 13 | 93  | Excluded non-core region                                                                             |
| 1864793 | A | A   | 16 | G | 162 | G | 7  | 54  | Potential false positive in Wagner et al.: heterogeneous position with abnormal cover peak in region |
| 1895361 | C | A   | 22 | A | 14  | A | 10 | 100 | Excluded non-core region                                                                             |
| 1914093 | T | C   | 19 | C | 14  | C | 8  | 100 | Excluded non-core region                                                                             |
| 1982740 | A | C   | 11 | C | 9   | C | 8  | 89  | Excluded non-core region                                                                             |
| 2072914 | G | G   | 35 | A | 13  | A | 4  | 80  | Potential false positive in Wagner et al.: heterogeneous position with abnormal cover peak in region |
| 2117516 | G | A   | 12 | A | 22  | A | 15 | 100 | Excluded non-core region                                                                             |



|         |   |     |    |   |    |     |    |     |                                                                                                      |
|---------|---|-----|----|---|----|-----|----|-----|------------------------------------------------------------------------------------------------------|
| 2119347 | T | T   | 45 | A | 7  | N/A | 0  | 0   | Potential false positive in Wagner et al.: position not covered in the re-analysis of Wagner et al.  |
| 2141322 | T | C   | 27 | C | 5  | C   | 3  | 60  | Excluded non-core region                                                                             |
| 2141910 | C | A   | 18 | A | 10 | A   | 6  | 100 | Excluded non-core region                                                                             |
| 2218046 | G | T   | 17 | T | 5  | T   | 1  | 100 | Excluded non-core region                                                                             |
| 2235109 | T | C   | 1  | C | 12 | C   | 11 | 100 | Less than 5X coverage in Altenerding                                                                 |
| 2281856 | A | N/A | 0  | C | 10 | C   | 7  | 100 | Less than 5X coverage in Altenerding                                                                 |
| 2304950 | A | G   | 11 | G | 27 | G   | 14 | 100 | Excluded non-core region                                                                             |
| 2317730 | A | C   | 10 | C | 18 | C   | 9  | 100 | Excluded non-core region                                                                             |
| 2453454 | A | G   | 14 | G | 11 | G   | 7  | 100 | Excluded non-core region                                                                             |
| 2548551 | G | T   | 20 | T | 19 | T   | 12 | 100 | Excluded non-core region                                                                             |
| 2575152 | G | A   | 4  | A | 33 | A   | 14 | 100 | Less than 5X coverage in Altenerding                                                                 |
| 2577686 | A | G   | 28 | G | 24 | G   | 12 | 100 | Excluded non-core region                                                                             |
| 2607034 | C | T   | 23 | T | 18 | T   | 15 | 100 | Excluded non-core region                                                                             |
| 2619611 | T | G   | 15 | G | 9  | G   | 5  | 100 | Excluded non-core region                                                                             |
| 2787770 | T | G   | 25 | G | 13 | G   | 2  | 100 | Excluded non-core region                                                                             |
| 2865494 | A | A   | 30 | C | 9  | C   | 3  | 100 | Potential false positive in Wagner et al.: less than 5X coverage in the re-analysis of Wagner et al. |
| 2894703 | T | N/A | 0  | C | 16 | C   | 10 | 100 | Excluded non-core region                                                                             |

|         |   |   |    |   |    |   |    |     |                                                                                                                      |
|---------|---|---|----|---|----|---|----|-----|----------------------------------------------------------------------------------------------------------------------|
| 2896636 | A | G | 10 | G | 41 | G | 21 | 88  | Excluded non-core region                                                                                             |
| 3143800 | G | G | 21 | T | 29 | G | 1  | 100 | Potential false positive in Wagner et al.: SNP does not exist in the re-analysis of Wagner et al.                    |
| 3155055 | G | G | 26 | C | 54 | C | 5  | 71  | Potential false positive in Wagner et al.: heterogeneous position with abnormal cover peak in region                 |
| 3248223 | T | C | 9  | C | 10 | C | 7  | 100 | Excluded non-core region                                                                                             |
| 3358603 | G | T | 9  | T | 30 | T | 23 | 100 | Excluded non-core region                                                                                             |
| 3392897 | A | A | 22 | G | 79 | G | 11 | 85  | Potential false positive in Wagner et al.: heterogeneous position with abnormal cover peak in region                 |
| 3403167 | G | T | 6  | T | 16 | T | 10 | 100 | Excluded non-core region                                                                                             |
| 3472427 | G | A | 17 | A | 18 | A | 16 | 100 | Excluded non-core region                                                                                             |
| 3725545 | T | C | 14 | C | 19 | C | 12 | 100 | Excluded non-core region                                                                                             |
| 3732919 | A | G | 15 | G | 20 | G | 13 | 100 | Excluded non-core region                                                                                             |
| 3737968 | G | A | 13 | A | 19 | A | 11 | 100 | Excluded non-core region                                                                                             |
| 3739401 | C | A | 18 | A | 9  | A | 6  | 100 | Excluded non-core region                                                                                             |
| 3813424 | C | C | 10 | A | 23 | A | 4  | 100 | Potential false positive in Wagner et al.: less than 5X coverage in the re-analysis of Wagner et al.; abnormal cover |

|         |   |     |    |   |     |   |    |     |                                                                                                      |
|---------|---|-----|----|---|-----|---|----|-----|------------------------------------------------------------------------------------------------------|
|         |   |     |    |   |     |   |    |     | peak in region                                                                                       |
| 3909258 | T | C   | 8  | C | 10  | C | 10 | 100 | Excluded non-core region                                                                             |
| 4170791 | A | A   | 25 | G | 87  | G | 20 | 80  | Potential false positive in Wagner et al.: heterogeneous position with abnormal cover peak in region |
| 4199187 | A | A   | 47 | G | 70  | A | 3  | 75  | Potential false positive in Wagner et al.: heterogeneous position with abnormal cover peak in region |
| 4199190 | T | T   | 27 | C | 123 | C | 3  | 38  | Potential false positive in Wagner et al.: heterogeneous position with abnormal cover peak in region |
| 4203596 | G | G   | 22 | T | 51  | G | 3  | 100 | Potential false positive in Wagner et al.: SNP does not exist in the re-analysis of Wagner et al.    |
| 4210011 | T | T   | 34 | C | 262 | T | 8  | 100 | Potential false positive in Wagner et al.: SNP does not exist in the re-analysis of Wagner et al.    |
| 4232217 | C | N/A | 0  | T | 5   | T | 5  | 100 | Less than 5X coverage in Altenerding                                                                 |
| 4542642 | A | G   | 8  | G | 9   | G | 7  | 100 | Excluded non-core region                                                                             |

**Table S8: 19 potential false positive SNPs called by Wagner et al.**

| Position in CO92 | SNP type defined in Wagner et al. | Gene        |
|------------------|-----------------------------------|-------------|
| 221811           | Derived, non-synonymous           | <i>rpsJ</i> |
| 225902           | Ancestral                         |             |
| 333342           | Derived, synonymous               | <i>uvrA</i> |
| 497800           | Derived, synonymous               | <i>dnaK</i> |
| 1371020          | Ancestral                         |             |
| 1371025          | Derived, synonymous               | <i>gyrA</i> |
| 1864793          | Derived, synonymous               | <i>mnmA</i> |
| 2072914          | Derived, synonymous               | <i>fliI</i> |
| 2119347          | Ancestral                         |             |
| 2865494          | Ancestral                         |             |
| 3143800          | Derived, non-synonymous           | <i>ynbD</i> |
| 3155055          | Derived, synonymous               | <i>purI</i> |
| 3392897          | Derived, synonymous               | <i>napA</i> |
| 3813424          | Derived, synonymous               | <i>acnB</i> |
| 4170791          | Derived, synonymous               | <i>aceA</i> |
| 4199187          | Derived, synonymous               | <i>rpoC</i> |
| 4199190          | Derived, synonymous               | <i>rpoC</i> |
| 4203596          | Derived, synonymous               | <i>rpoB</i> |
| 4210011          | Ancestral                         |             |

**Table S9: 63 Unique SNPs in the Altentering genome cross-referenced against all *Y. pestis* genomes in the data set (excluding the Aschheim genome)**

| Position in CO92 | SNP type       | Ancestral AA | Derived AA | Gene ID | Gene name   |
|------------------|----------------|--------------|------------|---------|-------------|
| Chromosom        |                |              |            |         |             |
| 86824*           | intergenic     | N/A          | N/A        |         |             |
| 189912*          | intergenic     | N/A          | N/A        |         |             |
| 260148*          | non-synonymous | P            | S          | YPO0257 |             |
| 271114*          | non-synonymous | L            | I          | YPO0270 |             |
| 485976*          | synonymous     | A            | A          | YPO0460 | <i>thrB</i> |

|          |                |     |     |         |             |
|----------|----------------|-----|-----|---------|-------------|
| 557841*  | non-synonymous | R   | H   | YPO0517 | <i>hepA</i> |
| 727741   | non-synonymous | E   | K   | YPO0668 | <i>parE</i> |
| 779365*  | synonymous     | S   | S   | YPO0717 | <i>fliI</i> |
| 898980   | intergenic     | N/A | N/A |         |             |
| 1067966  | non-synonymous | G   | C   | YPO0966 |             |
| 1211729* | synonymous     | V   | V   | YPO1068 | <i>proS</i> |
| 1296743* | non-synonymous | V   | M   | YPO1150 | <i>bioA</i> |
| 1387701* | intergenic     | N/A | N/A |         |             |
| 1387756* | intergenic     | N/A | N/A |         |             |
| 1413031* | intergenic     | N/A | N/A |         |             |
| 1434752* | non-synonymous | D   | Y   | YPO1275 | <i>spr</i>  |
| 1489055  | synonymous     | Q   | Q   | YPO1322 | <i>deoR</i> |
| 1530658  | non-synonymous | R   | I   | YPO1363 |             |
| 1609461* | non-synonymous | T   | A   | YPO1417 |             |
| 1754708  | non-synonymous | P   | L   | YPO1539 | <i>galU</i> |
| 1868678  | intergenic     | N/A | N/A |         |             |
| 1956162  | intergenic     | N/A | N/A |         |             |
| 2092152* | synonymous     | G   | G   | YPO1847 | <i>yecS</i> |
| 2097520  | synonymous     | A   | A   | YPO1851 | <i>putA</i> |
| 2352174* | non-synonymous | V   | G   | YPO2071 |             |
| 2419529* | synonymous     | L   | L   | YPO2150 |             |
| 2495165* | intergenic     | N/A | N/A |         |             |
| 2725715  | intergenic     | N/A | N/A |         |             |
| 2753572* | synonymous     | P   | P   | YPO2455 |             |
| 2977542* | non-synonymous | S   | I   | YPO2649 | <i>nrdE</i> |
| 3078807* | non-synonymous | R   | S   | YPO2747 | <i>fadJ</i> |
| 3179828* | synonymous     | S   | S   | YPO2847 | <i>yegM</i> |
| 3274298* | synonymous     | A   | A   | YPO2930 | <i>pdxJ</i> |
| 3360963* | non-synonymous | T   | P   | YPO3008 |             |
| 3360984* | non-synonymous | H   | Y   | YPO3008 |             |
| 3398153  | synonymous     | L   | L   | YPO3043 |             |

|              |                |     |     |           |             |
|--------------|----------------|-----|-----|-----------|-------------|
| 3409414      | intergenic     | N/A | N/A |           |             |
| 3500922      | non-synonymous | V   | G   | YPO3141   | <i>tesB</i> |
| 3535148*     | non-synonymous | A   | S   | YPO3171   | <i>apbA</i> |
| 3560088      | non-synonymous | P   | S   | YPO3199   |             |
| 3568597      | non-synonymous | G   | E   | YPO3205   | <i>phoB</i> |
| 3750736      | intergenic     | N/A | N/A |           |             |
| 3755861      | intergenic     | N/A | N/A |           |             |
| 3843195*     | synonymous     | V   | V   | YPO3438   | <i>intB</i> |
| 3892488*     | non-synonymous | A   | T   | YPO3483   |             |
| 4066494*     | non-synonymous | V   | I   | YPO3646   | <i>pcp</i>  |
| 4307755      | non-synonymous | A   | V   | YPO3839   |             |
| 4412624*     | intergenic     | N/A | N/A |           |             |
| 4423366*     | synonymous     | A   | A   | YPO3938   | <i>glgP</i> |
| 4460688      | non-synonymous | R   | Q   | YPO3963   |             |
| 4465967      | synonymous     | S   | S   | YPO3966   |             |
| 4628496      | synonymous     | A   | A   | YPO4107   | <i>yieG</i> |
| 4629169      | intergenic     | N/A | N/A |           |             |
| pCD1 plasmid |                |     |     |           |             |
| 23564        | synonymous     | A   | A   | YPCD1.33c | <i>lcrR</i> |
| 29959        | non-synonymous | N   | S   | YPCD1.41  | <i>yscO</i> |
| 50462        | non-synonymous | K   | E   | YPCD1.71c | <i>yopJ</i> |
| 54237        | intergenic     | N/A | N/A |           |             |
| 55839        | intergenic     | N/A | N/A |           |             |
| 66608        | non-synonymous | L   | F   | YPCD1.92  |             |
| pMT1 plasmid |                |     |     |           |             |
| 32569        | synonymous     | T   | T   | YPMT1.30  |             |
| 47365        | synonymous     | R   | R   | YPMT1.44  |             |
| 62994        | intergenic     | N/A | N/A |           |             |
| 82435        | intergenic     | N/A | N/A |           |             |

\*30 unique SNPs detected in the Altenerding genome that were not called in *Wagner et al.*

**Table S10: Non-synonymous SNPs compared to CO92**

| Position in CO92 | CO92 | Altenerding | Ancestral /Derived | Codon Change | Amino Acid Change | Gene ID | Gene name          | Gene function                                                   |
|------------------|------|-------------|--------------------|--------------|-------------------|---------|--------------------|-----------------------------------------------------------------|
| Chromosome       |      |             |                    |              |                   |         |                    |                                                                 |
| 74539            | C    | T           | Anc                | GCC to ACC   | A to T            | YPO0063 |                    |                                                                 |
| 130643           | G    | A           | Anc                | ACC to ATC   | T to I            | YPO0122 | <i>glpE</i>        | thiosulfate sulfurtransferase                                   |
| 189227*          | C    | T           | Anc                | CGT to TGT   | R to C            | YPO0169 | <i>pabA</i>        | para-aminobenzoate synthase component II                        |
| 260148*          | C    | T           | der                | CCG to TCG   | P to S            | YPO0257 |                    | type III secretion protein                                      |
| 271114*          | C    | A           | der                | CTT to ATT   | L to I            | YPO0270 |                    | type III secretion system protein (iron-sulfur binding protein) |
| 341720           | A    | G           | Anc                | CAC to CGC   | H to R            | YPO0332 | <i>rhaS</i>        | transcriptional activator                                       |
| 399533           | C    | A           | Anc                | TTC to TTA   | F to L            | YPO0383 | <i>aidB</i>        | isovaleryl CoA dehydrogenase                                    |
| 557841*          | C    | T           | der                | CGT to CAT   | R to H            | YPO0517 | <i>hepA (RapA)</i> | ATP-dependent helicase (transcription regulator)                |
| 727741           | G    | A           | der                | GAA to AAA   | E to K            | YPO0668 | <i>parE</i>        | DNA to poimerase IV subunit B                                   |
| 877258           | T    | C           | Anc                | TTT to CTT   | F to L            | YPO0797 | <i>lysR</i>        | LysR family transcriptional regulator                           |
| 918790           | C    | T           | Anc                | CCA to CTA   | P to L            | YPO0839 | <i>kduD2</i>       | 2-deoxy-D-gluconate 3-dehydrogenase                             |
| 1025278          | T    | G           | Anc                | TCT to GCT   | S to A            | YPO0932 |                    |                                                                 |
| 1051913          | A    | G           | Anc                | AGG to GGG   | R to G            | YPO0953 |                    |                                                                 |
| 1067966          | C    | A           | der                | GGC to TGC   | G to C            | YPO0966 |                    | kinase                                                          |
| 1098675*         | A    | C           | Anc                | AGC to CGC   | S to R            | YPO0989 | <i>iucA</i>        | pseudo gene                                                     |
| 1102174          | A    | G           | Anc                | ACA to GCA   | T to A            | YPO0993 | <i>iucD</i>        | siderophore biosynthesis protein                                |
| 1251046          | T    | C           | Anc                | ATC to ACC   | I to T            | YPO1107 | <i>GrpE</i>        | heat shock protein                                              |
| 1272559          | T    | C           | Anc                | GTT to GCT   | V to A            | YPO1126 |                    | I-pal system protein YbgF                                       |
| 1296743*         | C    | T           | der                | GTG to ATG   | V to M            | YPO1150 | <i>bioA</i>        | adenosylmethionine-8-amino-7-oxononanoate                       |

|          |   |   |     |            |        |         |                    |                                                                                                     |
|----------|---|---|-----|------------|--------|---------|--------------------|-----------------------------------------------------------------------------------------------------|
|          |   |   |     |            |        |         |                    | aminotransferase (part of the Biotin operon)                                                        |
| 1434752* | C | A | der | GAT to TAT | D to Y | YPO1275 | <i>spr</i>         | outer membrane lipoprotein (Murein hydrolase)                                                       |
| 1512930  | A | G | Anc | ACG to GCG | T to A | YPO1348 |                    |                                                                                                     |
| 1530658  | C | A | der | AGA to ATA | R to I | YPO1363 |                    | virulence factor                                                                                    |
| 1609461* | T | C | der | ACA to GCA | T to A | YPO1417 |                    | iron-sulfur binding protein                                                                         |
| 1705810  | A | C | Anc | GTG to GGG | V to G | YPO1502 |                    | alcohol dehydrogenase                                                                               |
| 1754708  | C | T | der | CCA to CTA | P to L | YPO1539 | <i>galU</i>        | UTP-glucose-1-phosphate uridylyltransferase                                                         |
| 1859946* | T | C | Anc | AGT to GGT | S to G | YPO1634 | <i>phoP</i>        | DNA-binding transcriptional regulator                                                               |
| 2012524  | T | G | Anc | TTG to GTG | L to V | YPO1767 | <i>hpaI (hpcH)</i> | 2,4-dihydroxyhept-2-ene-1,7-dioic acid aldolase                                                     |
| 2098628  | T | C | Anc | AAT to AGT | N to S | YPO1851 | <i>putA</i>        | trifunctional transcriptional regulator/proline dehydrogenase/pyrroline-5-carboxylate dehydrogenase |
| 2262577  | T | G | Anc | CTG to CGG | L to R | YPO1990 |                    |                                                                                                     |
| 2278317  | A | G | Anc | GTT to GCT | V to A | YPO2005 |                    |                                                                                                     |
| 2300659  | T | G | Anc | GAC to GCC | D to A | YPO2029 |                    |                                                                                                     |
| 2352174* | T | G | der | GTG to GGG | V to G | YPO2071 |                    | DEAD box family helicase                                                                            |
| 2356003  | T | A | Anc | AAT to AAA | N to K | YPO2074 | <i>fadD</i>        | long chain fatty acid CoA ligase                                                                    |
| 2508389  | T | C | Anc | ACA to GCA | T to A | YPO2234 | <i>cstA</i>        | carbon starvation protein A                                                                         |
| 2744933  | A | G | Anc | ATT to GTT | I to V | YPO2446 |                    | 2-deoxyglucose-6-phosphatase                                                                        |
| 2773647  | A | G | Anc | GTC to GCC | V to A | YPO2472 |                    |                                                                                                     |
| 2812384  | G | T | Anc | CCG to CAG | P to Q | YPO2502 | <i>gutB</i>        | zinc-binding dehydrogenase                                                                          |
| 2829833  | A | G | Anc | TGC to CGC | C to R | YPO2519 |                    | SAM-dependent methyltransferase                                                                     |
| 2903882  | T | G | Anc | TGT to GGT | C to G | YPO2582 |                    | sugar transport ATP-binding protein                                                                 |
| 2936268  | G | A | Anc | CTT to TTT | L to F | YPO2614 | <i>gltJ</i>        | glutamate/Faspartate transport system permease                                                      |
| 2950954  | G | A | Anc | GCG to GTG | A to V | YPO2625 | <i>nagC</i>        | N-acetylglucosamine regulatory protein                                                              |
| 2977542* | C | A | der | AGC to ATC | S to I | YPO2649 | <i>nrdE</i>        | ribonucleotide-diphosphate reductase subunit alpha                                                  |
| 3078807* | C | A | der | CGT to AGT | R to S | YPO2747 | <i>fadJ (faoA)</i> | multifunctional fatty acid oxidation complex subunit                                                |



|          |   |   |     |            |        |         |                                |                                                         |
|----------|---|---|-----|------------|--------|---------|--------------------------------|---------------------------------------------------------|
|          |   |   |     |            |        |         |                                | alpha                                                   |
| 3085079  | A | G | Anc | ACT to GCT | T to A | YPO2752 | <i>mepA</i>                    | penicillin-insensitive murein endopeptidase             |
| 3096319  | G | A | Anc | GGA to GAA | G to E | YPO2762 |                                | AraC family transcriptional regulator                   |
| 3145523  | A | C | Anc | CTC to CGC | L to R | YPO2814 | <i>ynbD</i>                    |                                                         |
| 3190399  | A | G | Anc | CAG to CGG | Q to R | YPO2853 | <i>baeR</i>                    | DNA-binding transcriptional regulator                   |
| 3244204  | A | G | Anc | GTC to GCC | V to A | YPO2901 |                                |                                                         |
| 3267118* | A | G | Anc | CTG to CCG | L to P | YPO2921 | <i>purL</i>                    | phosphoribosylformylglycine midine synthase             |
| 3360963* | A | C | der | ACC to CCC | T to P | YPO3008 |                                | two-component sensor histidine kinase (TCSs)            |
| 3360984* | C | T | der | CAT to TAT | H to Y | YPO3008 |                                | two-component sensor histidine kinase (TCSs)            |
| 3362591  | A | G | Anc | AGC to GGC | S to G | YPO3009 |                                | two-component response regulator                        |
| 3421335  | A | G | Anc | ATG to GTG | M to V | YPO3064 | <i>bcp</i>                     | thioredoxin-dependent thiol peroxidase                  |
| 3442617* | A | T | Anc | AGA to AGT | R to S | YPO3086 | <i>copA</i>                    | copper exporting ATPase                                 |
| 3500922  | T | G | der | GTG to GGG | V to G | YPO3141 | <i>tesB</i>                    | acyl-CoA thioesterase                                   |
| 3535148* | G | T | der | GCT to TCT | A to S | YPO3171 | <i>apbA</i><br>( <i>panE</i> ) | 2-dehydropantoate 2-reductase (vitamin B5 biosynthesis) |
| 3560088  | G | A | der | CCA to TCA | P to S | YPO3199 |                                | short chain dehydrogenase                               |
| 3564026  | C | T | Anc | TGT to TAT | C to Y | YPO3201 | <i>proY</i>                    | permease                                                |
| 3568597  | C | T | der | GGA to GAA | G to E | YPO3205 | <i>phoB</i>                    | phosphate regulon transcriptional regulator             |
| 3616733  | A | G | Anc | CTA to CCA | L to P | YPO3247 | <i>hmwA</i>                    | adhesin                                                 |
| 3645151* | C | G | Anc | GCC to GGC | A to G | YPO3272 | <i>yfiQ</i>                    | acetyltransferase                                       |
| 3658233* | T | G | Anc | AGA to AGC | R to S | YPO3277 | <i>rluD</i>                    | 23S rRNA pseudouridine synthase D                       |
| 3667806  | A | G | Anc | AAA to GAA | K to E | YPO3287 | <i>yehT</i>                    | two-component response-regulatory protein               |
| 3806677  | C | T | Anc | AGG to AAG | R to K | YPO3408 | <i>hpt</i>                     | hypoxanthine phosphoribosyltransferase                  |
| 3892488* | C | T | Anc | GCT to ACT | A to T | YPO3483 |                                | multidrug efflux protein                                |
| 3973746  | C | T | Anc | ACT to ATT | T to I | YPO3559 |                                |                                                         |
| 4066494* | C | T | der | GTT to ATT | V to I | YPO3646 | <i>pcp</i><br>( <i>pcpY</i> ,  | outer membrane lipoprotein                              |

|         |   |   |     |            |        |               |               |                                                                      |
|---------|---|---|-----|------------|--------|---------------|---------------|----------------------------------------------------------------------|
|         |   |   |     |            |        |               | <i>slyB</i> ) |                                                                      |
| 4080579 | T | C | Anc | CAC to CGC | H to R | YPO3659       | <i>accB</i>   | acetyl-CoA carboxylase<br>biotin carboxyl carrier<br>protein subunit |
| 4194600 | G | A | Anc | GTT to ATT | V to I | YPO3742       | <i>thiG</i>   | thiazole synthase                                                    |
| 4243823 | A | T | Anc | TTT to TAT | F to Y | YPO3781       | <i>ubiE</i>   | ubiquinone,menaquinone<br>biosynthesis<br>methyltransferase          |
| 4307755 | G | A | der | GCG to GTG | A to V | YPO3839       |               |                                                                      |
| 4339366 | T | G | Anc | AGT to CGT | S to R | YPO3865       | <i>wzzE</i>   | lipopolysaccharide<br>biosynthesis protein                           |
| 4399470 | A | G | Anc | AGC to GGC | S to G | YPO3917       |               | dihydrolipoamide<br>dehydrogenase                                    |
| 4421633 | T | C | Anc | GTG to GCG | V to A | YPO3937       | <i>glpD</i>   | glycerol-3-phosphate<br>dehydrogenase                                |
| 4421689 | A | G | Anc | ACA to GCA | T to A | YPO3937       | <i>glpD</i>   | glycerol-3-phosphate<br>dehydrogenase                                |
| 4460688 | C | T | der | CGG to CAG | R to Q | YPO3963       |               | sugar transport system<br>permease                                   |
| 4579183 | A | G | Anc | AGC to GGC | S to G | YPO4060       | <i>fdhD</i>   | formate dehydrogenase<br>accessory protein                           |
| 4634287 | A | G | Anc | TCG to CCG | S to P | YPO4113       | <i>phoU</i>   | transcriptional regulator                                            |
| pCD1    |   |   |     |            |        |               |               |                                                                      |
| 29959   | A | G | der | AAC to AGC | N to S | YPCD1.41      | <i>yscO</i>   | type III secretion apparatus<br>component                            |
| 50462   | T | C | der | AAA to GAA | K to E | YPCD1.71<br>c | <i>yopJ</i>   | targeted effector protein                                            |
| 66608   | C | T | der | CTT to TTT | L to F | YPCD1.92      |               |                                                                      |
| pMT1    |   |   |     |            |        |               |               |                                                                      |
| 12976*  | A | C | anc | TAT to GAT | Y to D | YPMT1.09<br>c |               | minor tail fiber protein L                                           |

\*SNPs detected in the Altenerding genome that were not called in the *Wagner et al.* Aschheim genome.

**Table S11: Regions missing in CO92 but present in the Altenerding genome. Positions and annotated genes refer to the *Yersinia pseudotuberculosis* reference genome (GenBank accession NC\_006155)**

| Start Position    | End Position | Region Length (bp) | Mean Coverage | ID of genes in region | Name of genes in region | Function                                                                                                           |
|-------------------|--------------|--------------------|---------------|-----------------------|-------------------------|--------------------------------------------------------------------------------------------------------------------|
| 97811             | 98932        | 1122               | 17.37         | YPTB0085              | <i>glpX</i>             | type II fructose 1,6-bisphosphatase (part of the <i>glpFKX</i> operon that enables aerobic glycerol fermentation). |
|                   |              |                    |               | YPTB0086              | <i>glpK</i>             | glycerol kinase (part of the <i>glpFKX</i> operon that enables aerobic glycerol fermentation).                     |
| 263822            | 264118       | 297                | 7.34          | YPTB0221              | <i>ftsY</i>             | cell division protein                                                                                              |
| 369602            | 369881       | 280                | 12.98         | YPTB0305              | <i>ytaP</i>             |                                                                                                                    |
| 408757            | 409016       | 260                | 3.2           | YPTB0343              |                         |                                                                                                                    |
|                   |              |                    |               | YPTB0344              |                         | coproporphyrinogen III oxidase                                                                                     |
| 799654            | 799932       | 279                | 5.24          | YPTB0668              | <i>setA (yadM)</i>      | major facilitator superfamily transporter sugar efflux pump                                                        |
| 807313            | 807587       | 275                | 5.88          | Intergenic            |                         |                                                                                                                    |
| 994244            | 994536       | 293                | 2.26          | Intergenic            |                         |                                                                                                                    |
| 1433136<br>(DFR4) | 1448749      | 15614              | 20.85         | YPTB1202              | <i>xapB</i>             | major facilitator superfamily xanthosine permease                                                                  |
|                   |              |                    |               | YPTB1203              | <i>zraP</i>             | zinc resistance protein                                                                                            |
|                   |              |                    |               | YPTB1204              |                         | two component Histidine kinase sensor                                                                              |
|                   |              |                    |               | YPTB1205              | <i>hydG</i>             | transcriptional regulator                                                                                          |
|                   |              |                    |               | YPTB1206              | <i>morB</i>             | morphinone reductase                                                                                               |
|                   |              |                    |               | YPTB1207              |                         | LysR family transcriptional regulator                                                                              |
|                   |              |                    |               | YPTB1208              |                         |                                                                                                                    |
|                   |              |                    |               | YPTB1209              |                         | multidrug ABC transporter permease                                                                                 |
|                   |              |                    |               | YPTB1210              |                         | multidrug ABC transporter permease                                                                                 |
|                   |              |                    |               | YPTB1211              |                         | ABC transporter ATPase                                                                                             |
|                   |              |                    |               | YPTB1212              |                         |                                                                                                                    |
|                   |              |                    |               | YPTB1213              |                         | DNA binding transcriptional regulator                                                                              |
|                   |              |                    |               | YPTB1214              | <i>rhlE</i>             | ATP dependent RNA helicase                                                                                         |
| 1753403           | 1753691      | 289                | 12.94         | YPTB1458              | <i>helD</i>             | DNA helicase IV                                                                                                    |

|         |         |      |       |          |             |                                                           |
|---------|---------|------|-------|----------|-------------|-----------------------------------------------------------|
| 2222016 | 2222305 | 290  | 6.05  | YPTB1880 |             |                                                           |
| 2603581 | 2604597 | 1017 | 13.44 | YPTB2210 | <i>tauB</i> | taurine/sulfonate transporter (part of the tauABC operon) |
|         |         |      |       | YPTB2211 | <i>amn</i>  | AMP nucleosidase                                          |
| 3877157 | 3879821 | 2665 | 18.66 | YPTB3285 |             | Va autotransporter                                        |
|         |         |      |       | YPTB3286 |             | Va autotransporter                                        |
| 3975571 | 3975841 | 271  | 10.76 | YPTB3344 |             |                                                           |
|         |         |      |       | YPTB3345 | <i>fliI</i> | flagellum specific ATP synthase                           |
| 4373203 | 4373468 | 266  | 12.02 | YPTB3659 |             | transferase                                               |
| 4490444 | 4490698 | 255  | 15.12 | YPTB3782 | <i>glpD</i> | glycerol 3-phosphate dehydrogenase                        |
| 4510659 | 4510920 | 262  | 22.16 | YPTB3789 |             | Ig-like domain containing protein                         |

## Supplementary figures

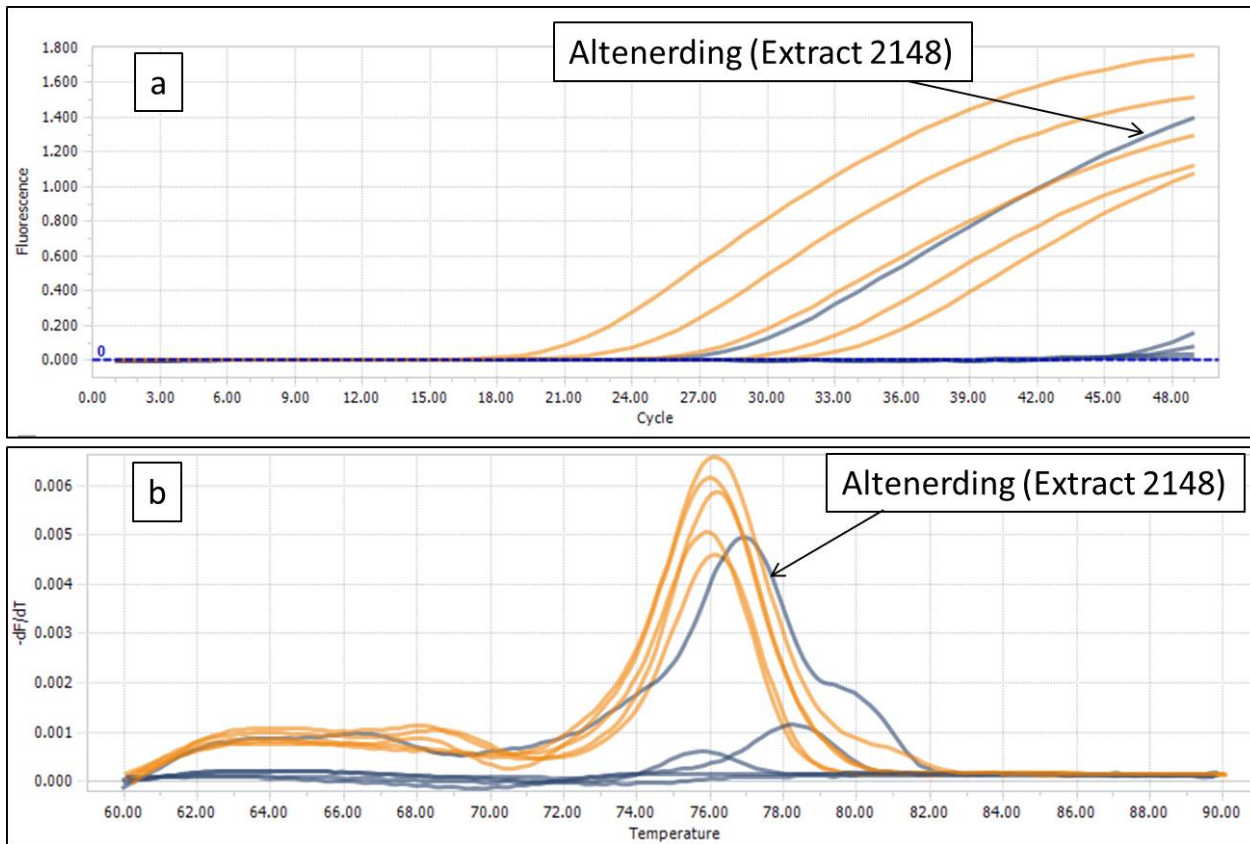

**Fig.S1: *pla* gene qPCR amplification and melting curves used for sample screening.** The standards of known copy number (22,300, 2230, 223, 22.3 and 2.23 copies/uL) are in duplicates, shown in yellow and grey. (a) Amplification curves. (b) Melting peaks.

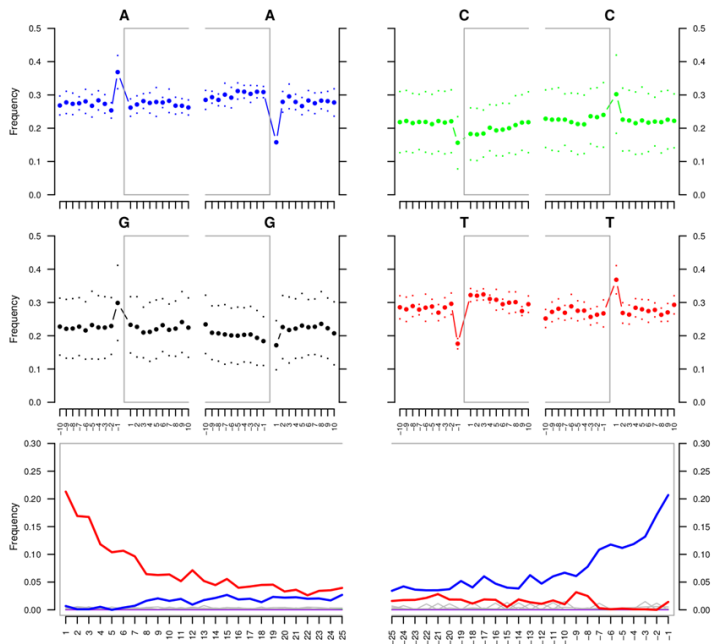

**Fig.S2: mapDamage fragment misincorporation plot based on the non-UDG treated Altenerding library mapped to the CO92 chromosome reference (5510 fragments).**

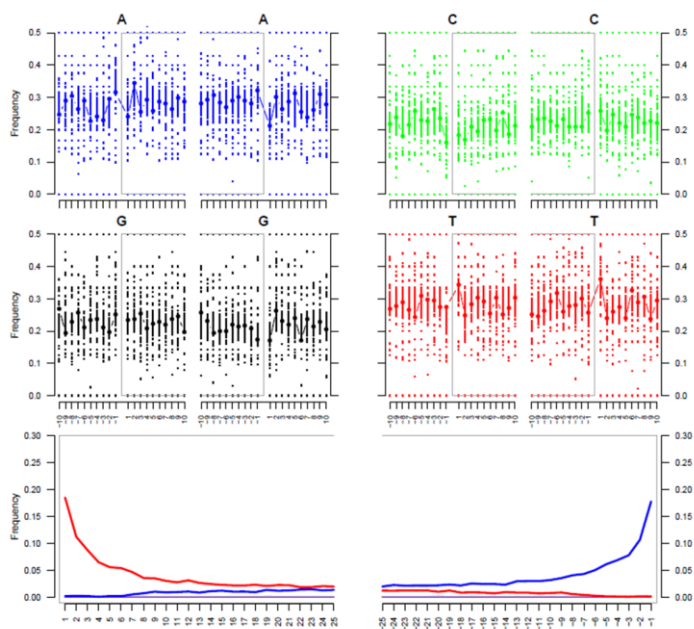

**Fig.S3: mapDamage fragment misincorporation plot based on the non-UDG treated Altenerding library mapped to the human hg19 reference (45,359 fragments).**

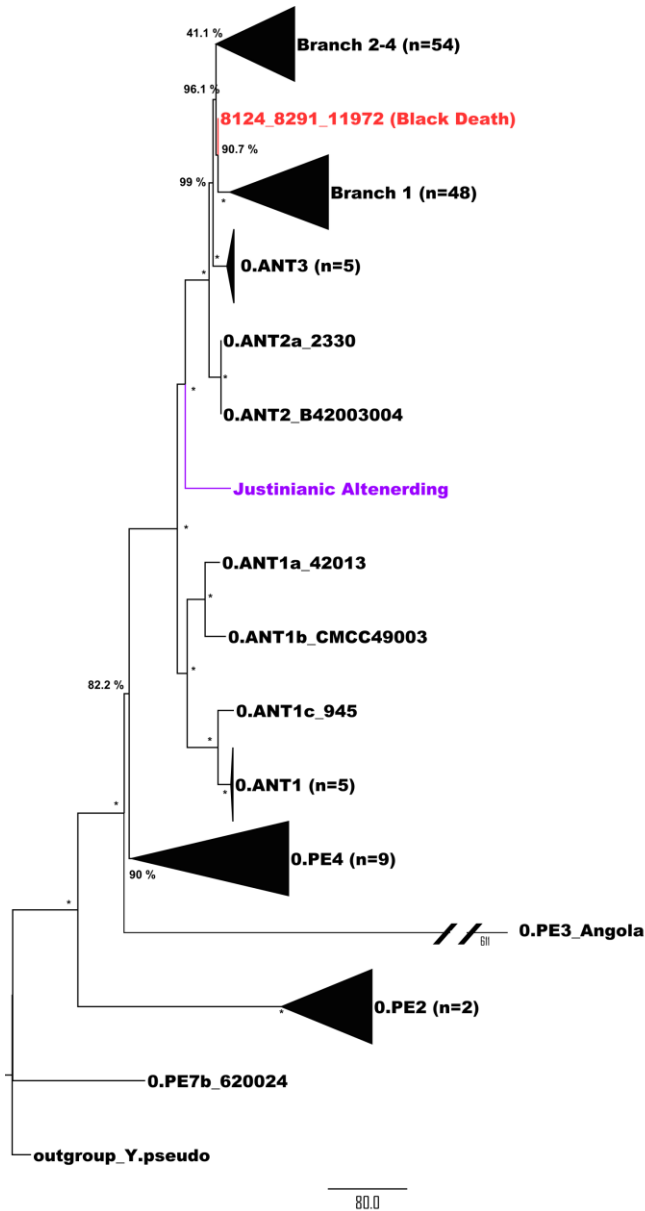

**Fig.S4: Maximum Parsimony tree excluding the Aschheim genome.** Maximum Parsimony analysis of 2603 nucleotide positions from genomes of 132 *Y. pestis* strains (the Aschheim genome was excluded from this analysis). All positions containing missing data were eliminated. Bootstrap values are next to nodes and bootstrap values of 100 % are indicated by an asterisk. The tree is rooted using the genome of *Y. pseudotuberculosis* (strain IP32953). Branches leading to isolates from the historical pandemics are colored red and purple representing the second and first pandemics respectively. Number of isolates in a collapsed node is indicated in brackets.

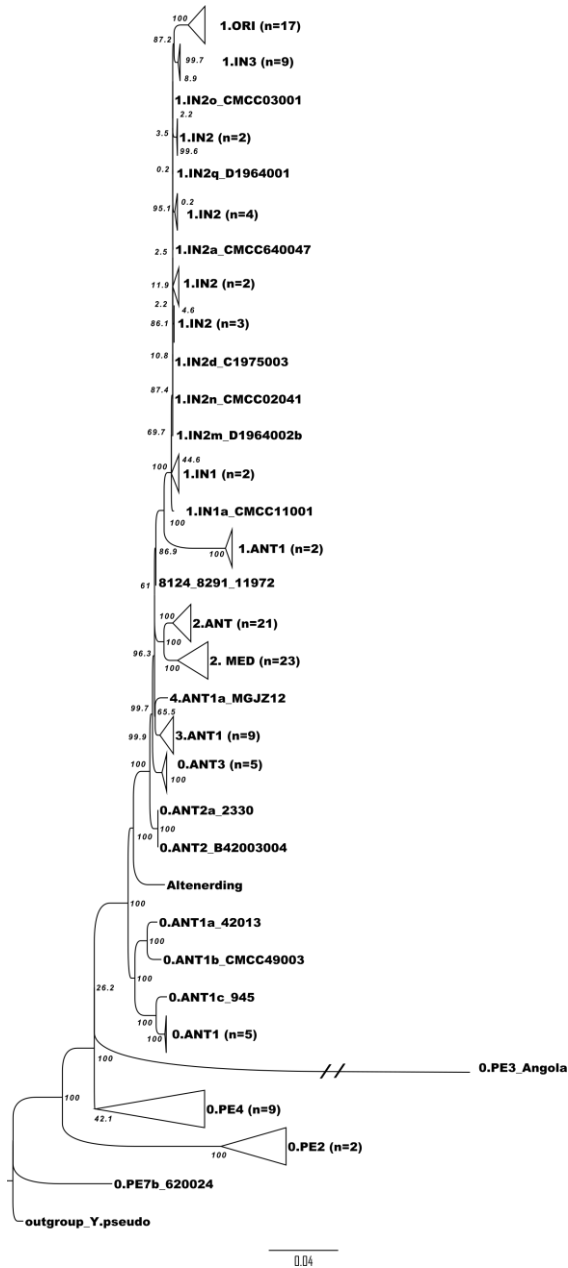

**Fig.S5: Maximum Likelihood tree excluding the Aschheim genome.** Maximum Likelihood analysis of 2603 nucleotide positions from genomes of 132 *Y. pestis* strains (the Aschheim genome was excluded from this analysis). All positions containing gaps and missing data were eliminated. Bootstrap values in italics. The tree is rooted using the genome of *Y. pseudotuberculosis* (strain IP32953). Number of isolates in a collapsed node is indicated in brackets.



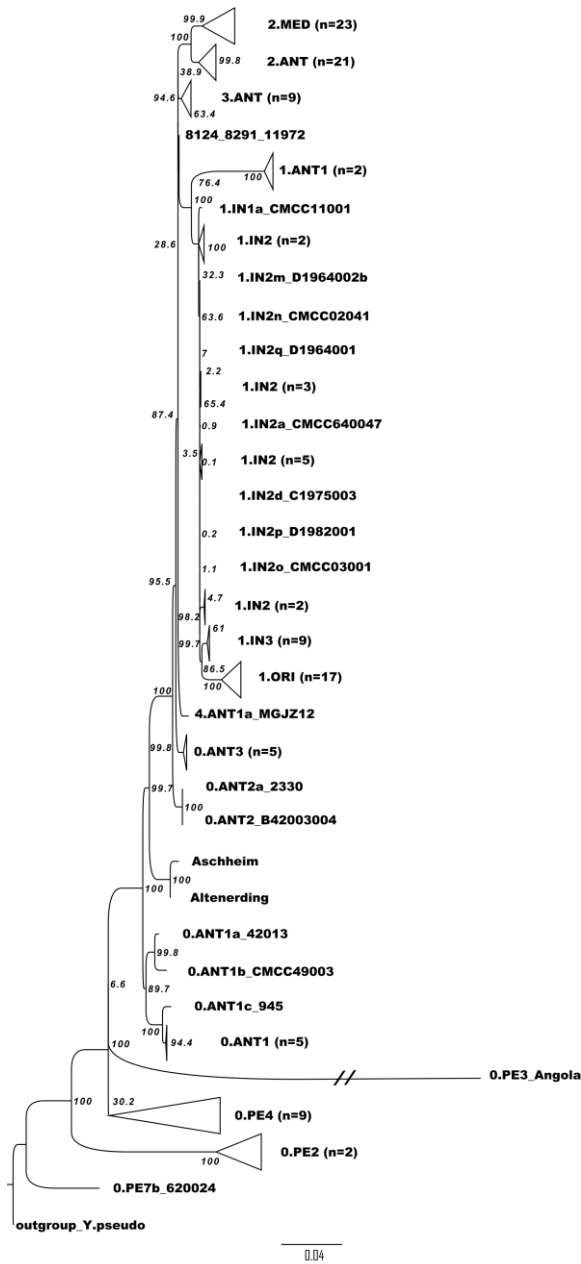

**Fig.S6: Maximum Likelihood tree.** Maximum Likelihood analysis of 1418 nucleotide positions from genomes of 133 *Y. pestis* strains. All positions containing gaps and missing data were eliminated. Bootstrap values in italics. The tree is rooted using the genome of *Y. pseudotuberculosis* (strain IP32953). Number of isolates in a collapsed node is indicated in brackets.

A

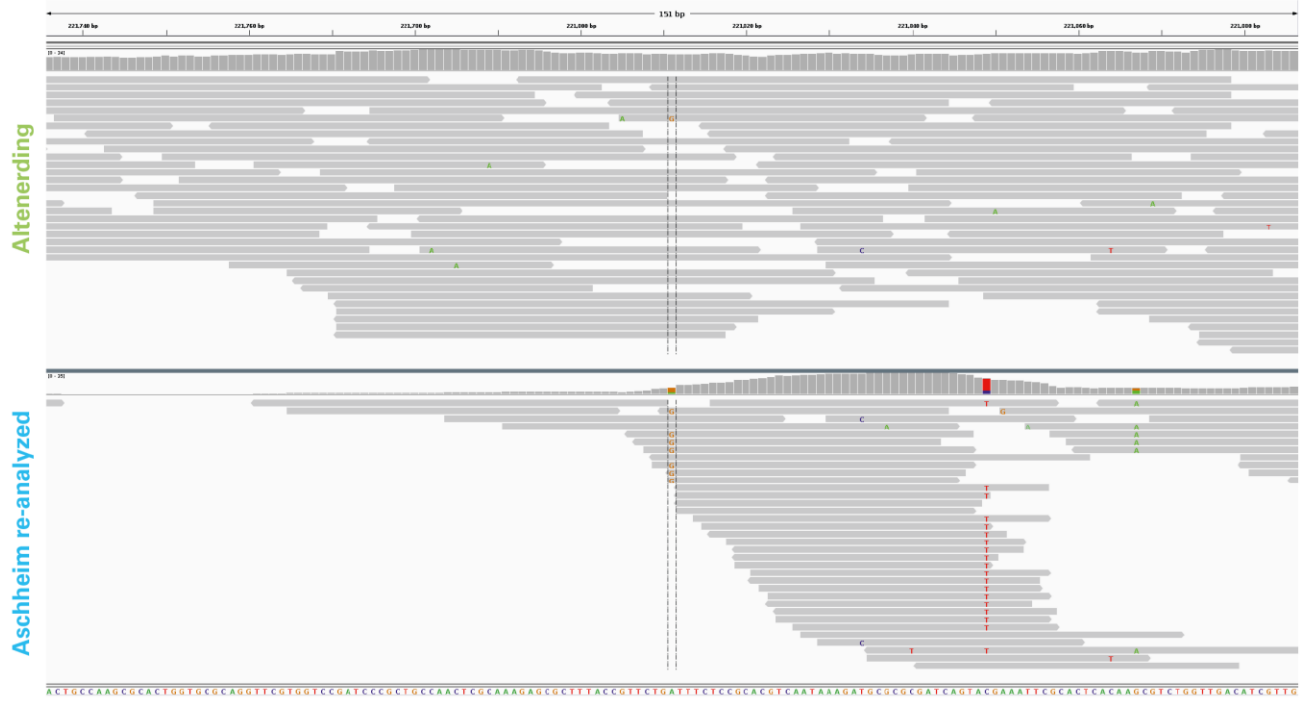

B

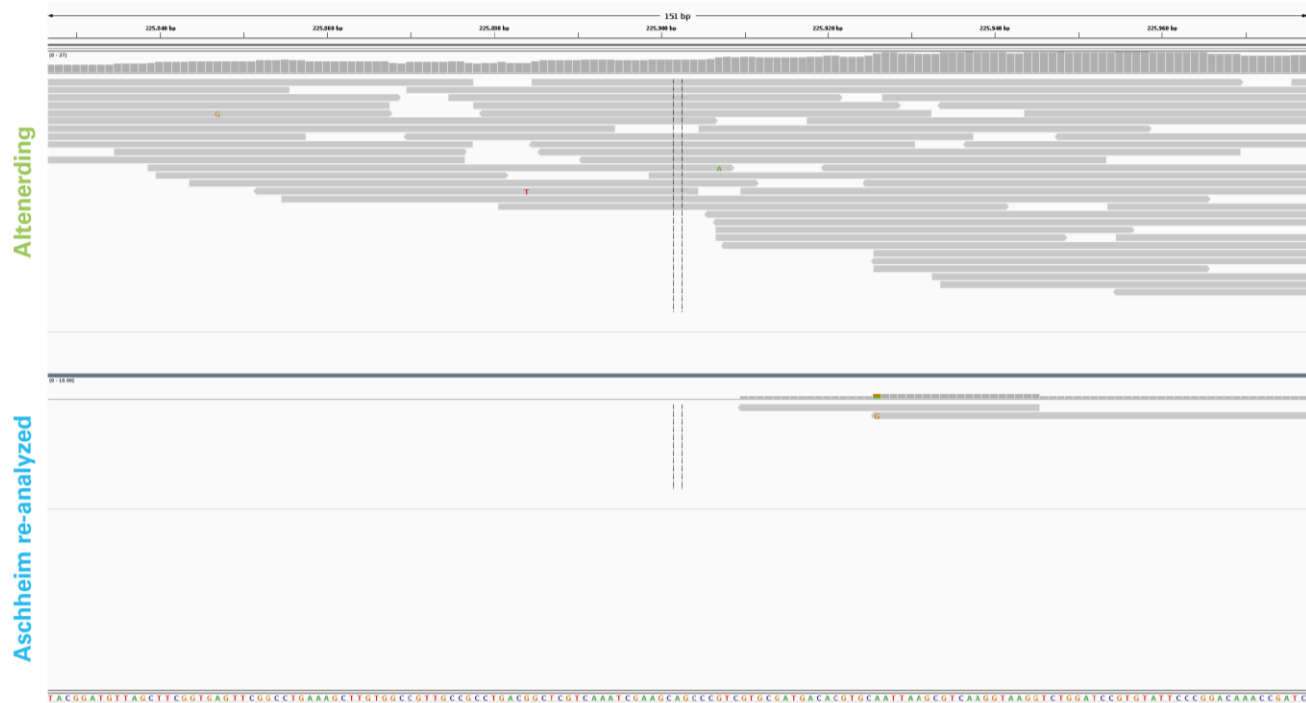

C

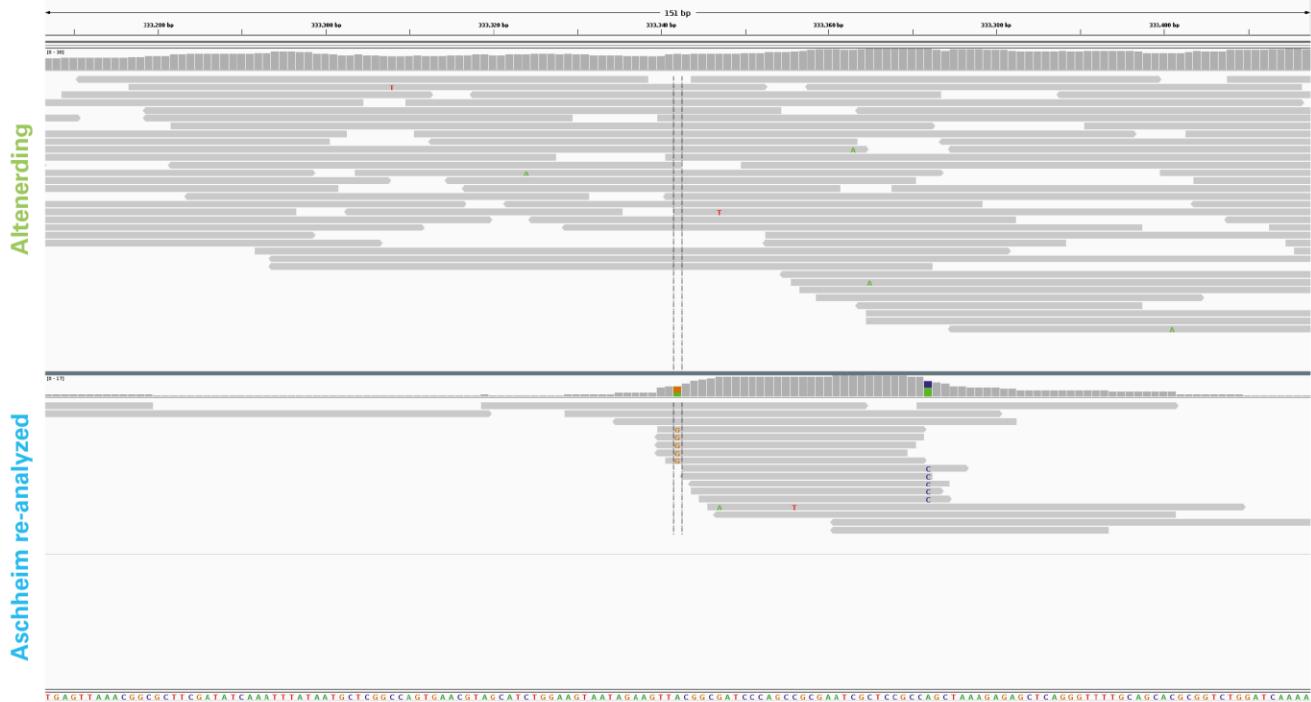

D

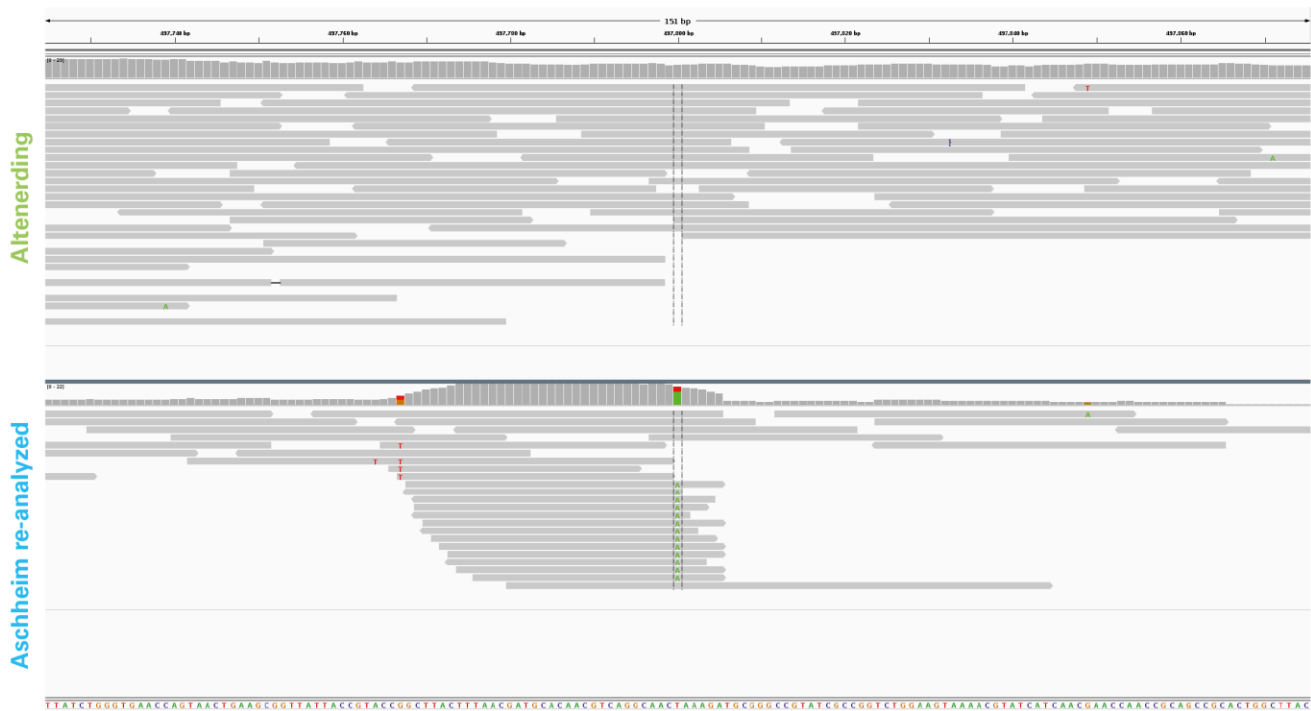

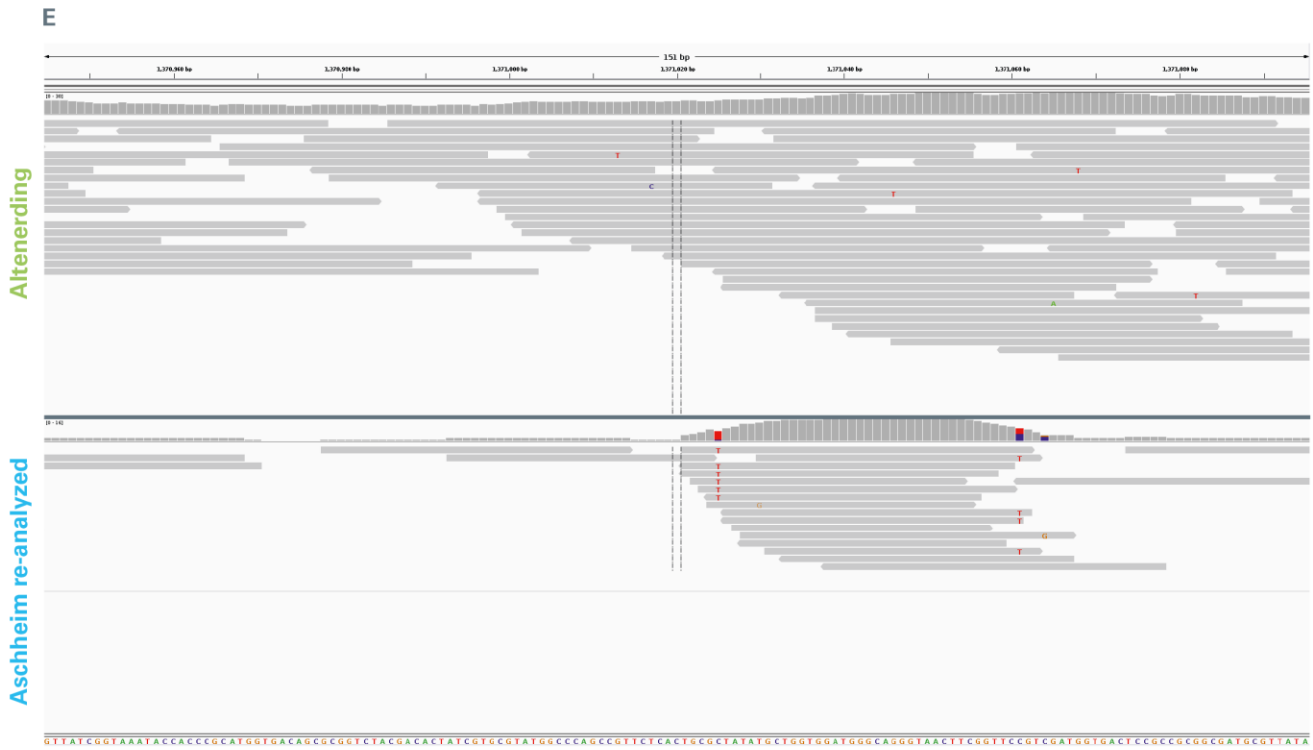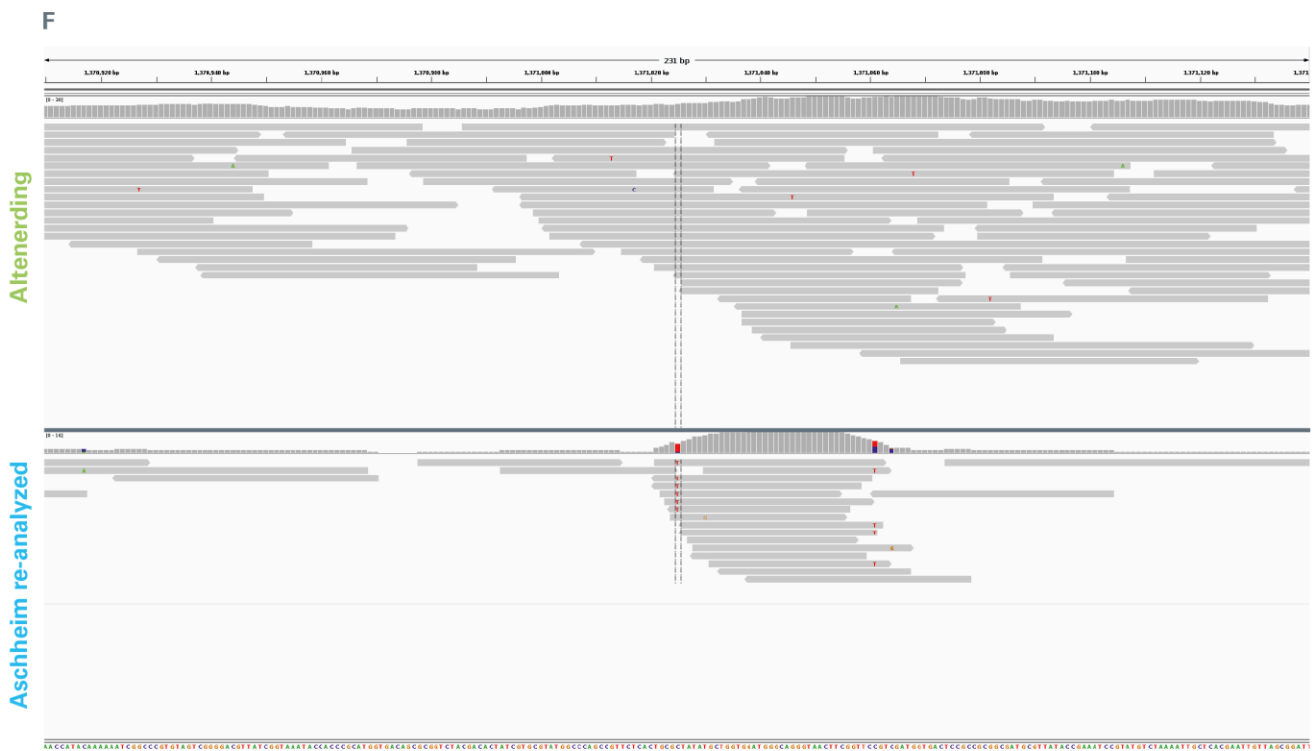

G

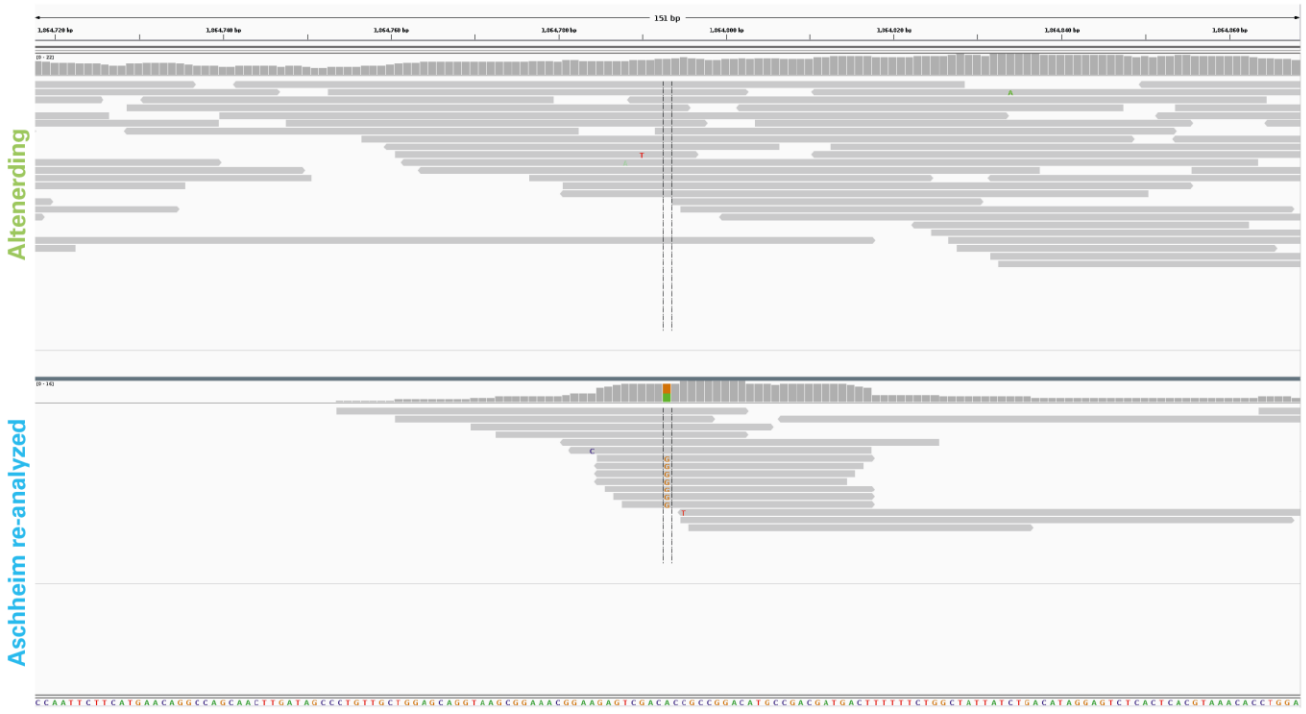

H

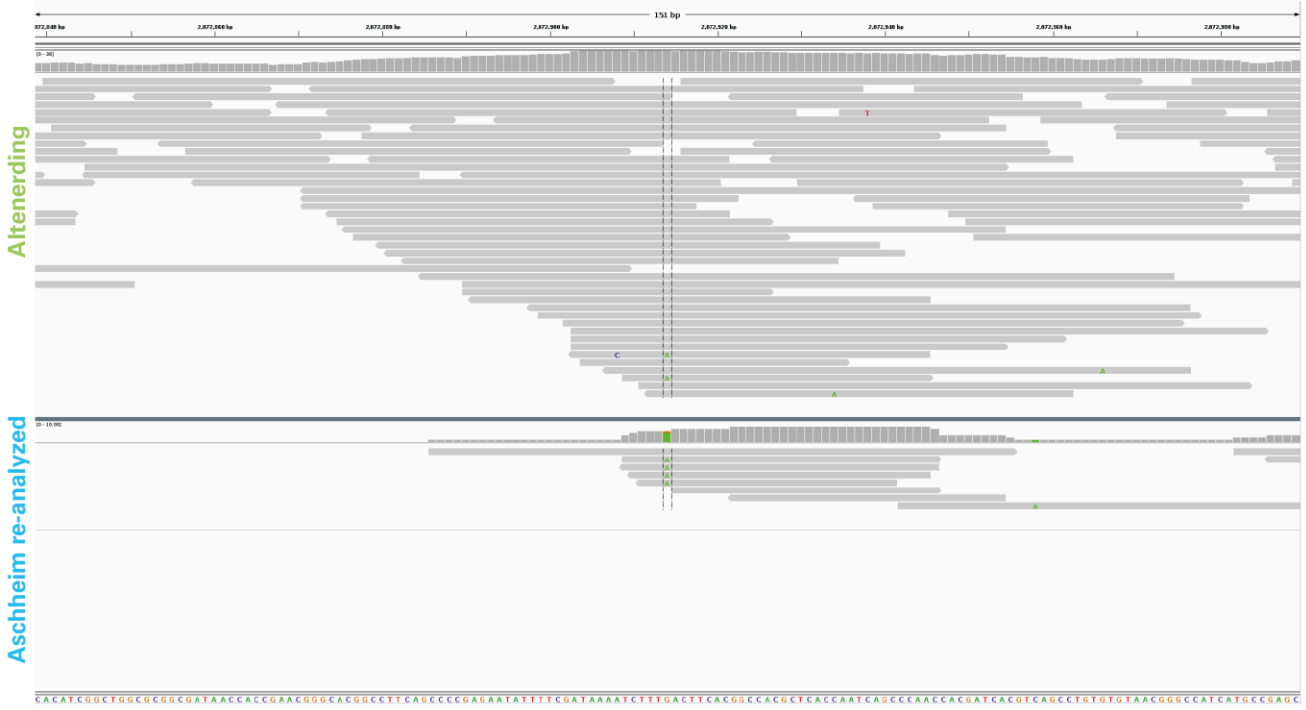

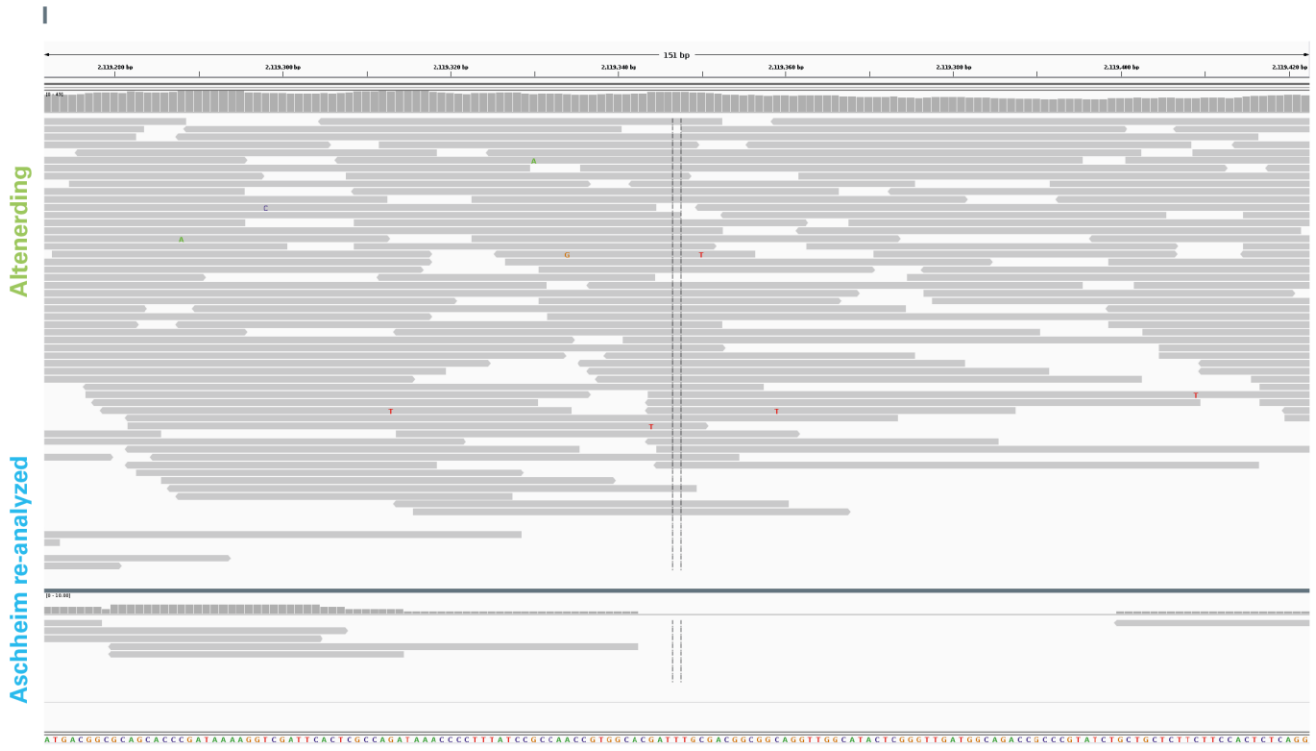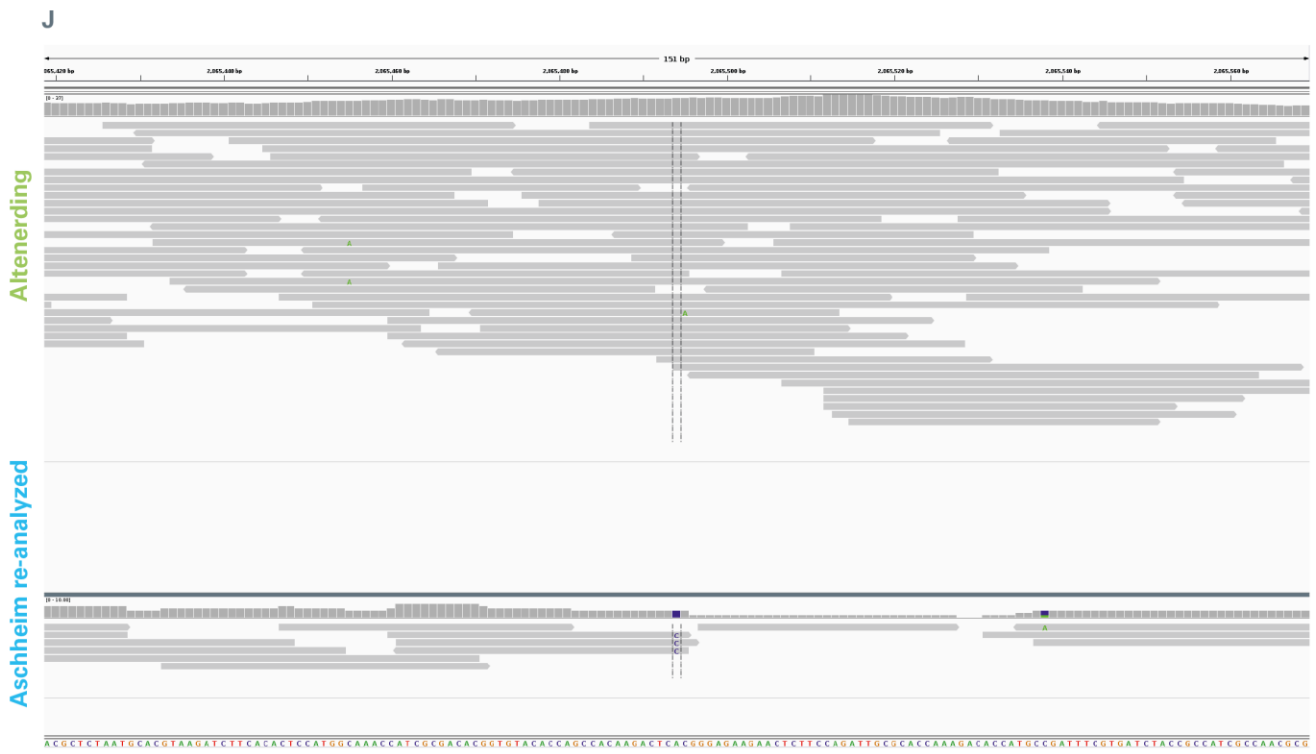

K

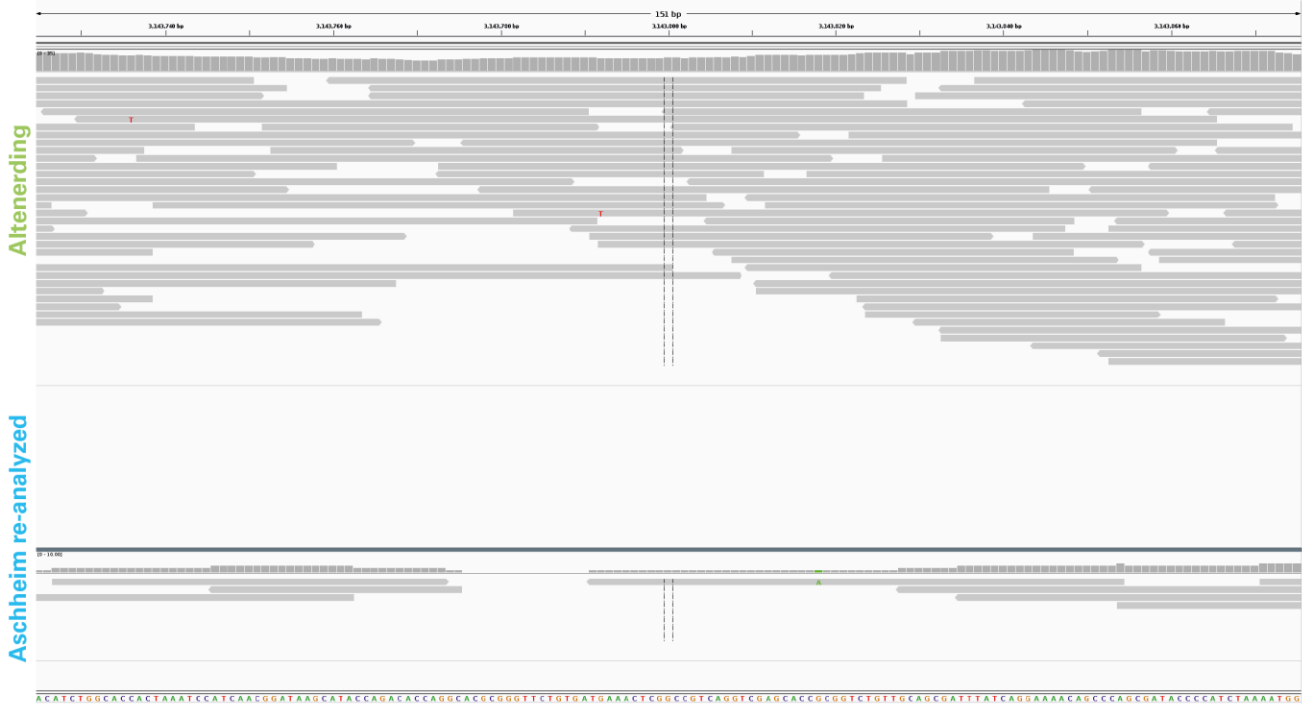

L

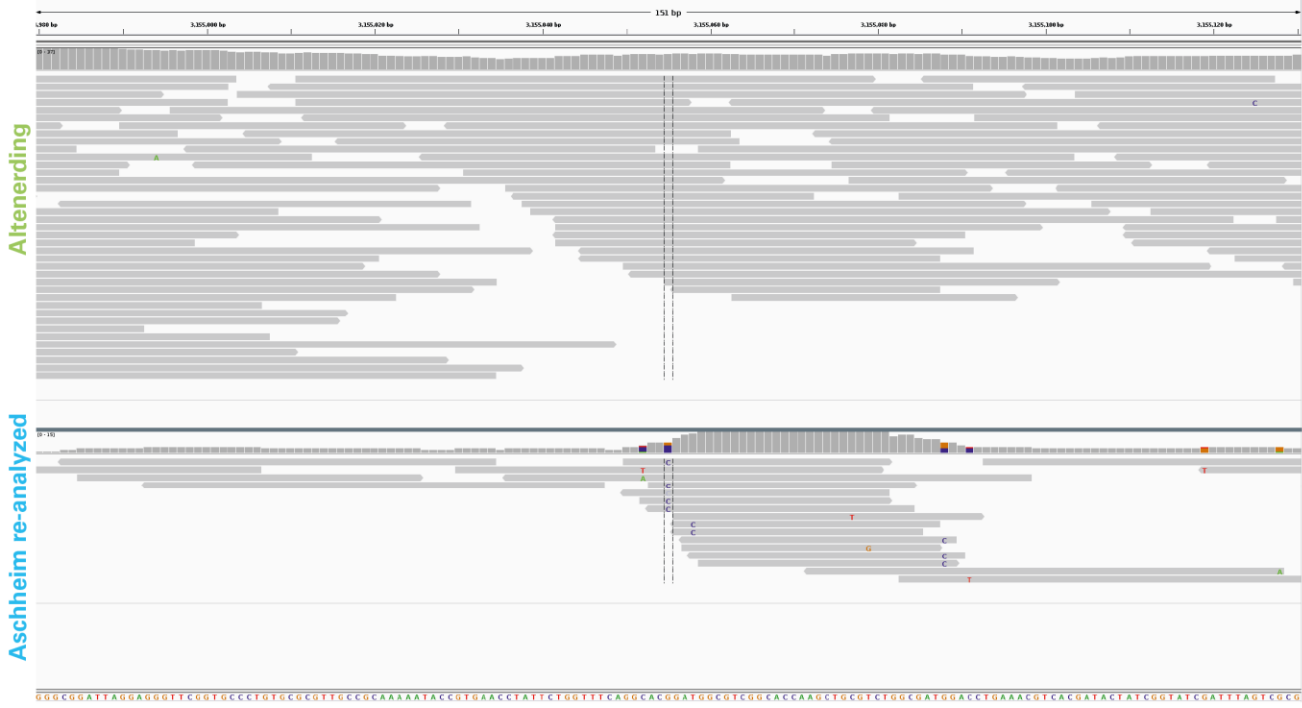

M

Altenerding

Aschheim re-analyzed

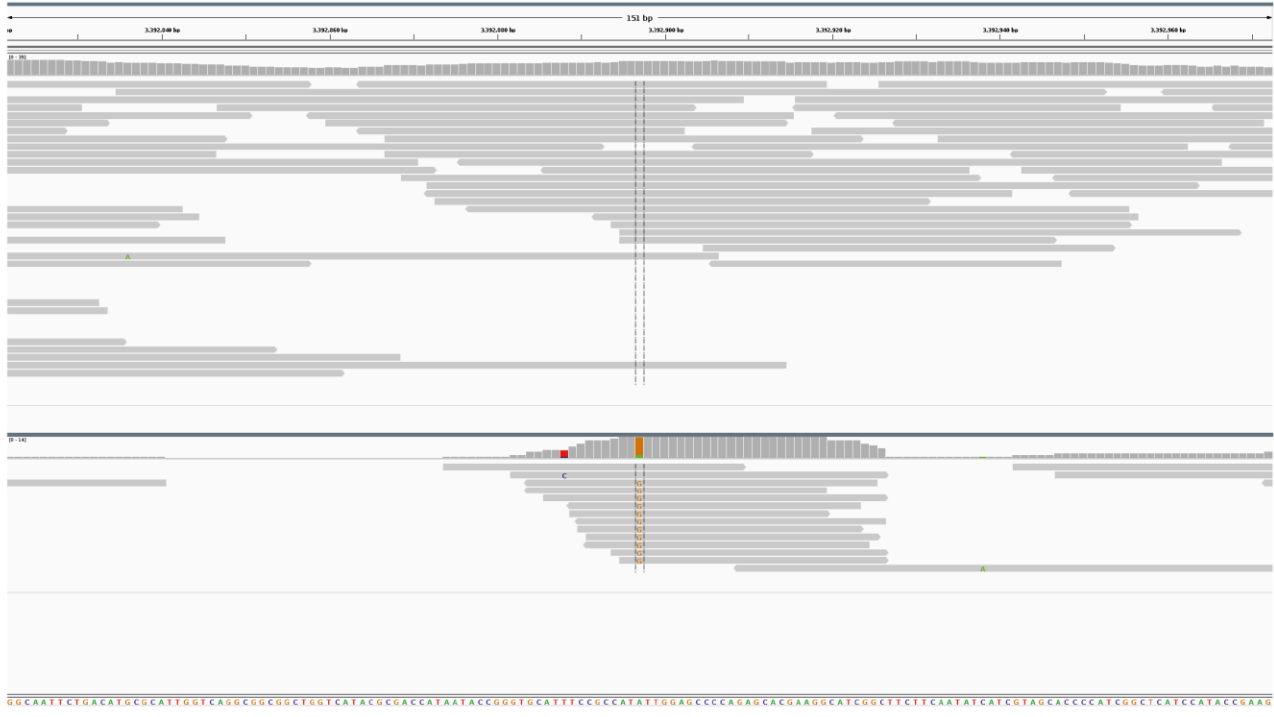

N

Altenerding

Aschheim re-analyzed

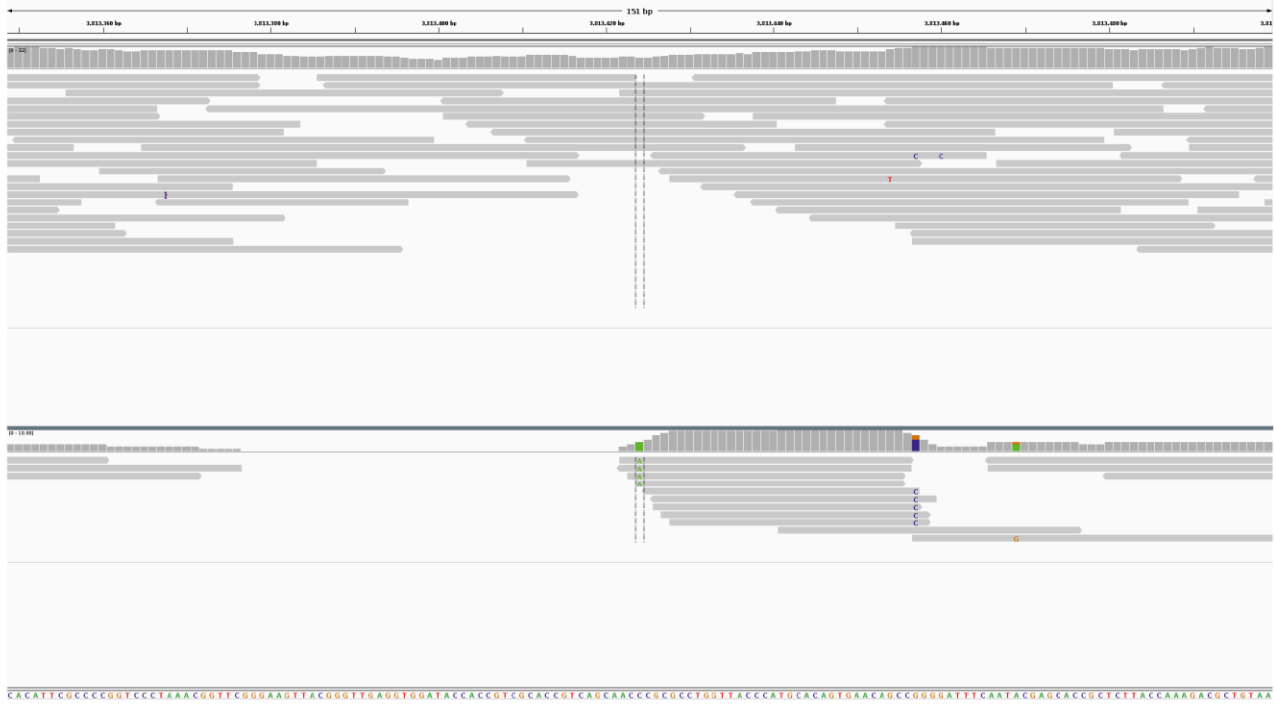



O

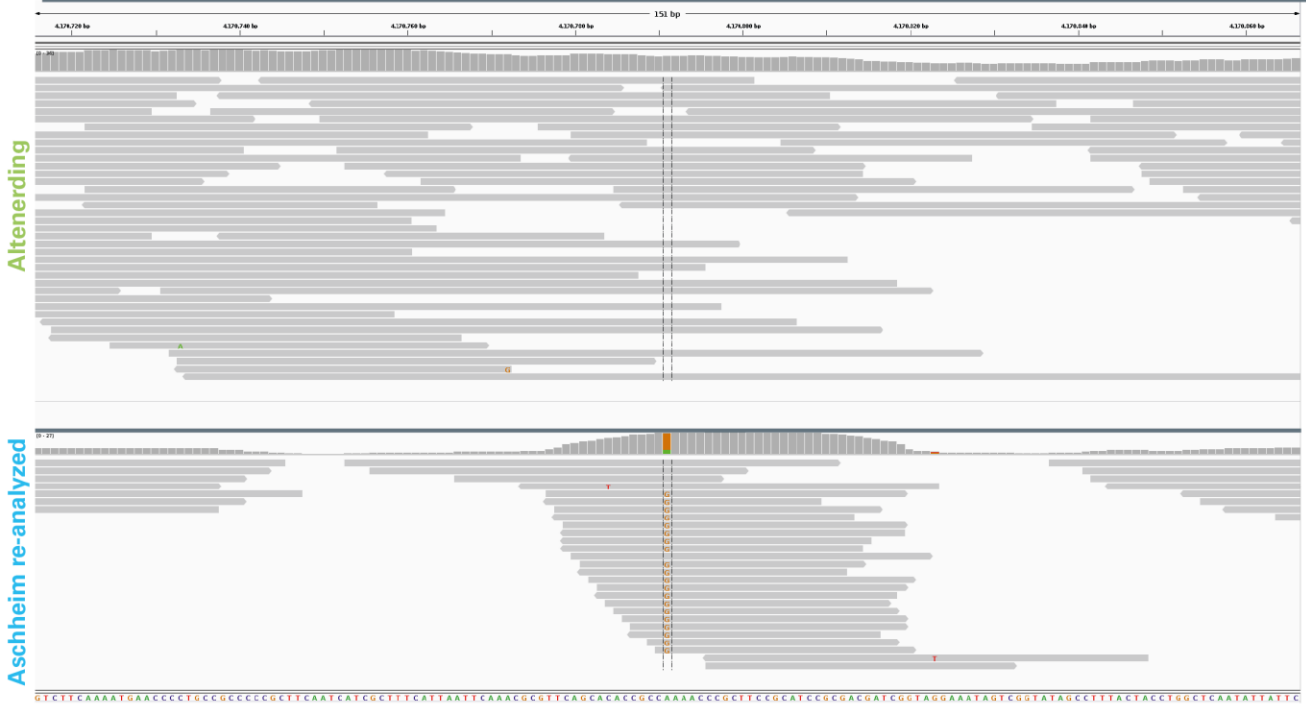

P

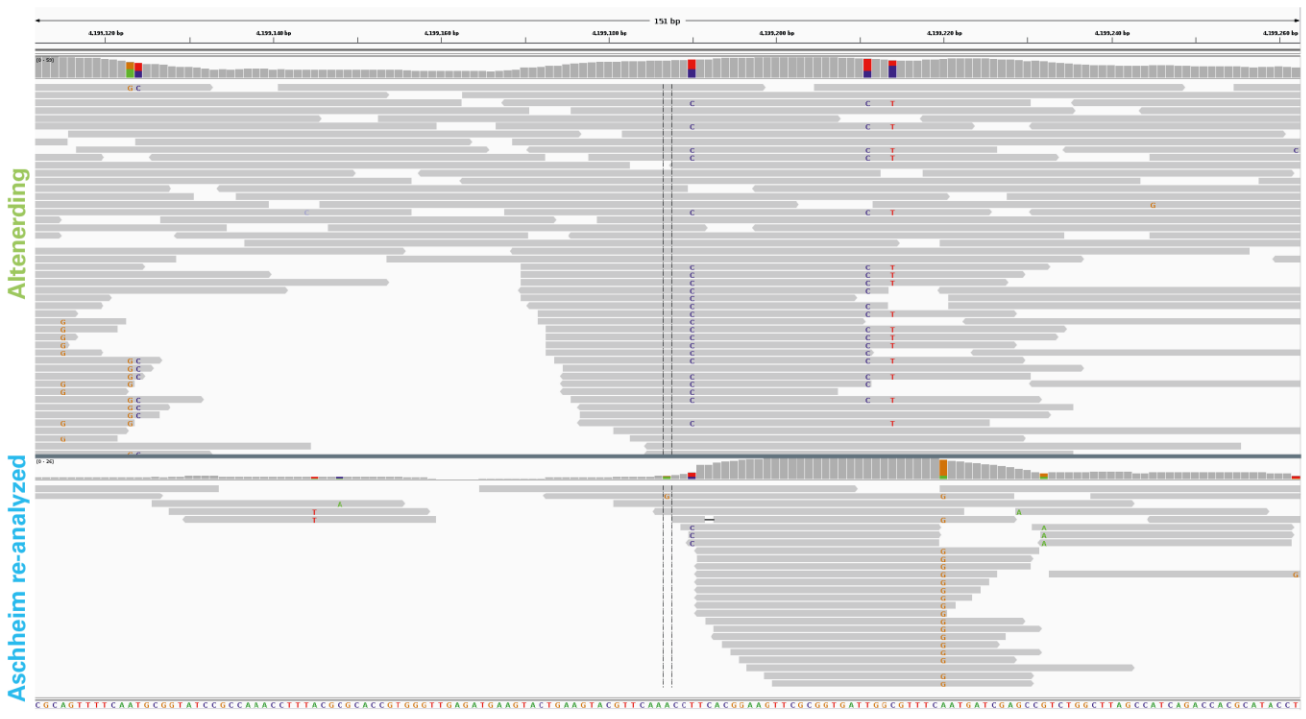

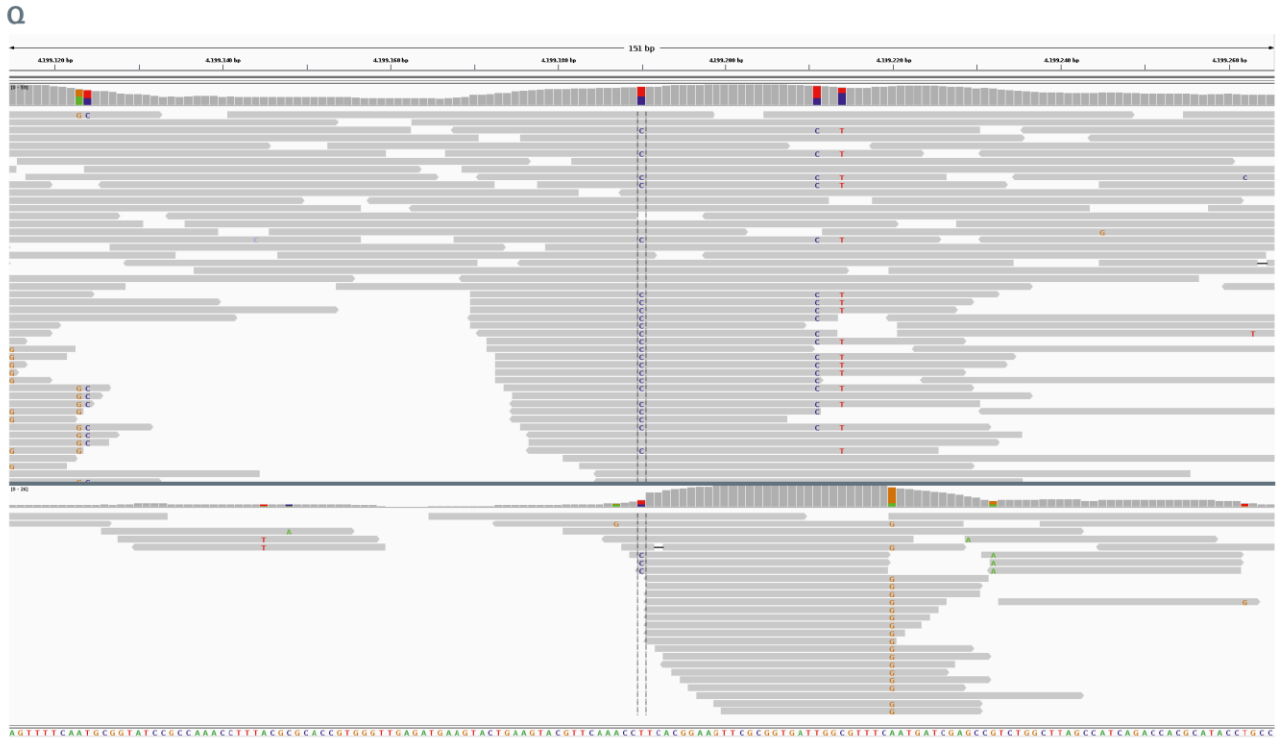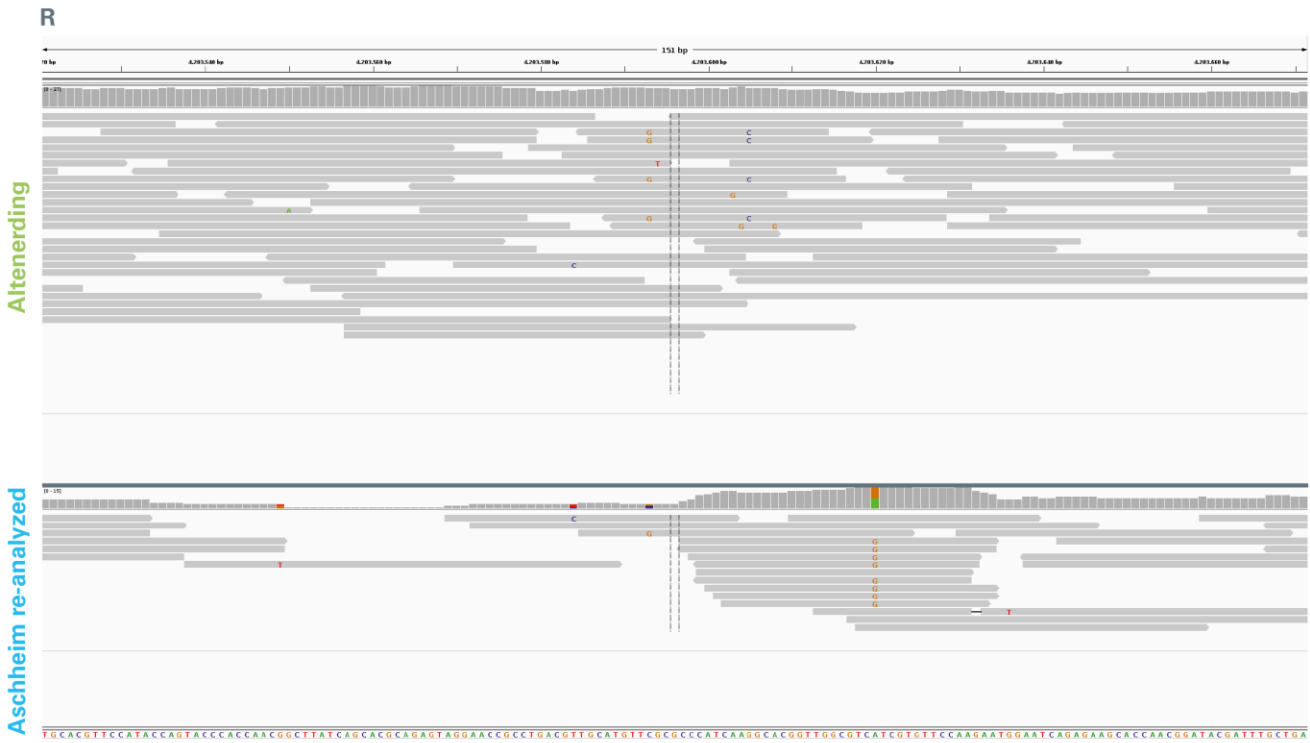

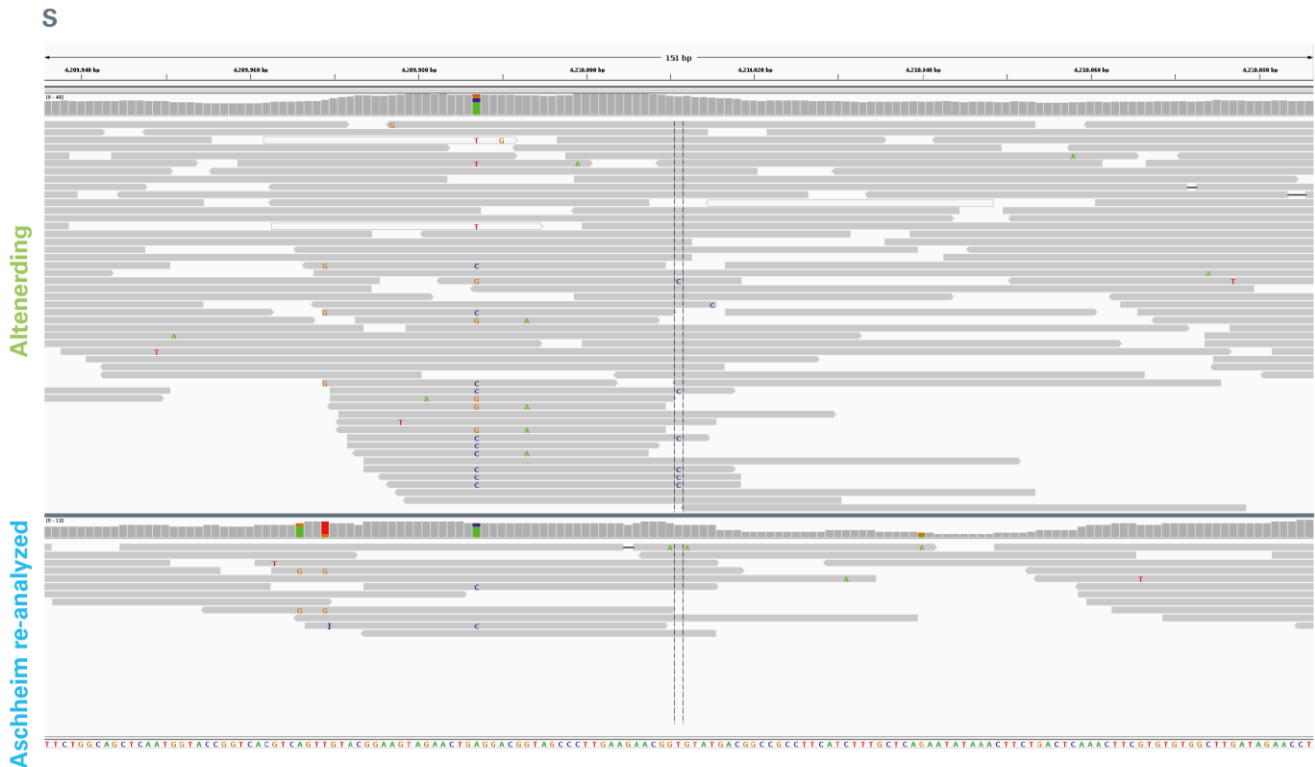

**Fig.S7 (A-S): Visualization of positions containing potential false positive SNPs called by *Wagner et al. 2014*.** Reads were mapped to the CO92 reference with sensitivity of 0.1 and minimum mapping quality of 30 and visualized on IGV gene browser. Upper bend shows coverage plot for the region corresponding to the genome beneath. Upper scale shows position (bp) in reference sequence. Bottom sequence shows the 150 bp in the CO92 reference. Dotted line marks the potential false positive SNP.

**(A) Position 221811:** Re-analysis of the Aschheim raw data shows 70 % variant frequency for the “A” to “G” variant called as SNP by Wagner et al. Variant frequency is lower than the minimum variant frequency of 95 % set by Wagner et al. The “G” variants are located at end of reads in a region with an abnormal cover peak. The Altnerding mapping shows even 24 fold coverage in the region and a 96 % variant frequency that supports the “A” variant (identical to reference).

**(B) Position 225902:** Re-analysis of the Aschheim raw data shows no coverage in position 225902 called as an “A” to “T” SNP by Wagner et al., in contrast to a 6 fold coverage in the original analysis (Wagner et al. 2014). The Altnerding mapping shows even 16 fold coverage in the region and a 100 % variant frequency that supports the “A” variant (identical to reference).

**(C) Position 333342:** Re-analysis of the Aschheim raw data shows 63 % variant frequency for the “A” to “G” variant called as SNP by Wagner et al. Variant frequency is lower than the minimum variant frequency of 95 % set by Wagner et al. The “G” variants are located at end of reads in a region with an abnormal peak in coverage. The Altenerding mapping shows even 22 fold coverage in the region and a 100 % variant frequency that supports the “A” variant (identical to reference).

**(D) Position 497800:** Re-analysis of the Aschheim raw data shows 72 % variant frequency for the “T” to “A” variant called as SNP by Wagner et al. Variant frequency is lower than the minimum variant frequency of 95 % set by Wagner et al. The “A” variants are located at end of reads in a region with an abnormal peak in coverage. The Altenerding mapping shows even 17 fold coverage in the region and a 100 % variant frequency that supports the “T” variant (identical to reference).

**(E) Position 137020:** Re-analysis of the Aschheim raw data shows 1 fold coverage in position 137020 called as a “C” to “A” SNP by Wagner et al., in contrast with a 8 fold coverage in the original analysis (Wagner et al. 2014). The one read covering the position shows the “C” variant (identical to reference). The Altenerding mapping shows even 17 fold coverage in the region and a 100 % variant frequency that supports the “C” variant (identical to reference).

**(F) Position 137025:** Re-analysis of the Aschheim raw data shows 86 % variant frequency for the “C” to “T” variant called as SNP by Wagner et al. Variant frequency is lower than the minimum variant frequency of 95 % set by Wagner et al. The “T” variants are located at end of reads in a region with an abnormal peak in coverage. The Altenerding mapping shows even 18 fold coverage in the region and a 100 % variant frequency that supports the “C” variant (identical to reference).

**(G) Position 1864793:** Re-analysis of the Aschheim raw data shows 54 % variant frequency for the “A” to “G” variant called as SNP by Wagner et al. Variant frequency is lower than the minimum variant frequency of 95 % set by Wagner et al. The reads containing the “G” variants are located in a region with an abnormal peak in coverage. The Altenerding mapping shows even 16 fold coverage in the region and a 100 % variant frequency that supports the “A” variant (identical to reference).

**(H) Position 2072914:** Re-analysis of the Aschheim raw data shows 80 % variant frequency for the “G” to “A” variant called as SNP by Wagner et al. Variant frequency is lower than the minimum variant frequency of 95 % set by Wagner et al. The “A” variants are located at end of reads in a region with an abnormal peak in coverage. The Altenerding mapping shows 37 fold coverage in the region and a 95% variant frequency that supports the “G” variant (identical to reference).

**(I) Position 2119347:** Re-analysis of the Aschheim raw data shows no coverage in position 2119347 called as a “T” to “A” SNP by Wagner et al., in contrast with a 7 fold coverage in the original analysis (Wagner et al. 2014). The Altenerding mapping shows even 45 fold coverage in the region and a 100 % variant frequency that supports the “T” variant (identical to reference).

**(J) Position 2865494:** Re-analysis of the Aschheim raw data shows 3 fold coverage in position 2865494 called as an “A” to “C” SNP by Wagner et al., in contrast with a 9 fold coverage in the original analysis (Wagner et al. 2014). Coverage is lower than the 5 fold minimum set by Wagner et al. The Altenerding mapping shows even 30 fold coverage in the region and a 100 % variant frequency that supports the “A” variant (identical to reference).

**(K) Position 3143800:** Re-analysis of the Aschheim raw data shows 1 fold coverage in position 3143800 called as a “G” to “T” SNP by Wagner et al., in contrast with a 29 fold coverage in the original analysis (Wagner et al. 2014). The one read covering the position shows the “G” variant (identical to reference). The Altenerding mapping shows even 21 fold coverage in the region and a 100 % variant frequency that supports the “G” variant (identical to reference).

**(L) Position 3155055:** Re-analysis of the Aschheim raw data shows 71 % variant frequency for the “G” to “C” variant called as SNP by Wagner et al. Variant frequency is lower than the minimum variant frequency of 95 % set by Wagner et al. The “C” variants are located at end of reads in a region with an abnormal peak in coverage. The Altenerding mapping shows even 27 fold coverage in the region and a 100 % variant frequency that supports the “G” variant (identical to reference).

**(M) Position 3392897:** Re-analysis of the Aschheim raw data shows 85 % variant frequency for the A to G variant called as SNP by Wagner et al. Variant frequency is lower than the minimum variant frequency of 95 % set by Wagner et al. The reads containing the “G” variants are located

in a region with an abnormal peak in coverage. The Altenerding mapping shows even 22 fold coverage in the region and a 100 % variant frequency that supports the “A” variant (identical to reference).

**(N) Position 3813424:** Re-analysis of the Aschheim raw data shows 4 fold coverage in position 3813424 called as a “C” to “A” SNP by Wagner et al., in contrast with a 23 fold coverage in the original analysis (Wagner et al. 2014). Coverage is lower than the 5 fold minimum set by Wagner et al. The A variants are located at end of reads in a region with an abnormal peak in coverage. The Altenerding mapping shows 10 fold coverage in the region and a 100 % variant frequency that supports the “C” variant (identical to reference).

**(O) Position 4170791:** Re-analysis of the Aschheim raw data shows 80 % variant frequency for the “A” to “G” variant called as SNP by Wagner et al. Variant frequency is lower than the minimum variant frequency of 95 % set in Wagner et al. The reads containing the “G” variants are located in a region with an abnormal peak in coverage. The Altenerding mapping shows even 25 fold coverage in the region and a 100 % variant frequency that supports the “A” variant (identical to reference).

**(P) Position 4199187:** Re-analysis of the Aschheim raw data shows 75 % variant frequency and 3 fold coverage for the “A” to “G” variant called as SNP by Wagner et al. Variant frequency is lower than the minimum variant frequency of 95 % and coverage is lower than the 5 fold minimum set by Wagner et al. The only “G” variant is located at the end of a read in a region with an abnormal peak in coverage. The Altenerding mapping shows 47 fold coverage in the region and a 100 % variant frequency that supports the “A” variant (identical to reference).

**(Q) Position 4199190:** Re-analysis of the Aschheim raw data shows 38 % variant frequency for the “T” to “C” variant called as SNP by Wagner et al. Variant frequency is lower than the minimum variant frequency of 95 % set by Wagner et al. The “C” variants are located at end of reads in a region with an abnormal peak in coverage. The Altenerding mapping also shows a cover peak in this region with 50 fold coverage and a 54% variant frequency of the “T” variant (identical to reference).

**(R) Position 4203596:** Re-analysis of the Aschheim raw data shows 3 fold coverage in position 4203596 called as a “G” to “T” SNP by Wagner et al., in contrast with a 51 fold coverage in the

original analysis (Wagner et al. 2014). All 3 reads contain the “G” variant (identical to reference). The Altenerding mapping shows even 22 fold coverage in the region and a 100 % variant frequency that supports the “G” variant (identical to reference).

**(S) Position 4210011:** Re-analysis of the Aschheim raw data shows 8 fold coverage in position 4210011 called as a “T” to “C” SNP by Wagner et al., in contrast with a 262 fold coverage in the original analysis (Wagner et al. 2014). All 8 reads contain the “T” variant (identical to reference). The Altenerding mapping shows 40 fold coverage in the position and an 85 % variant frequency of the “T” variant (identical to reference).

A

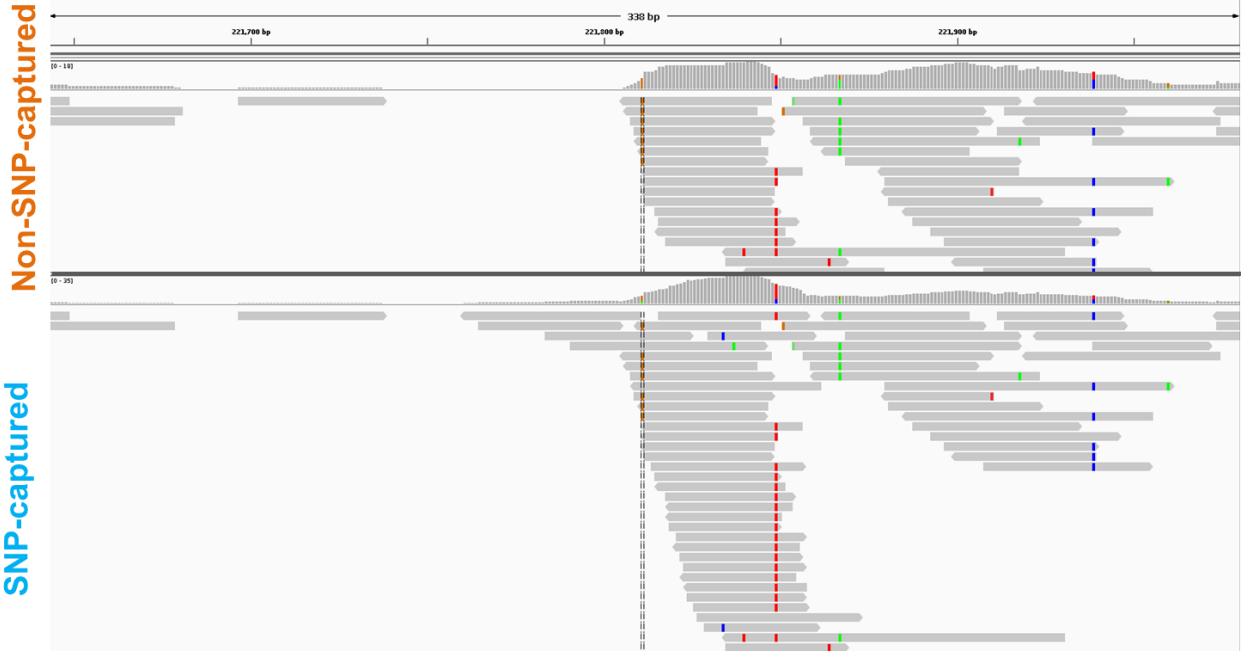

B

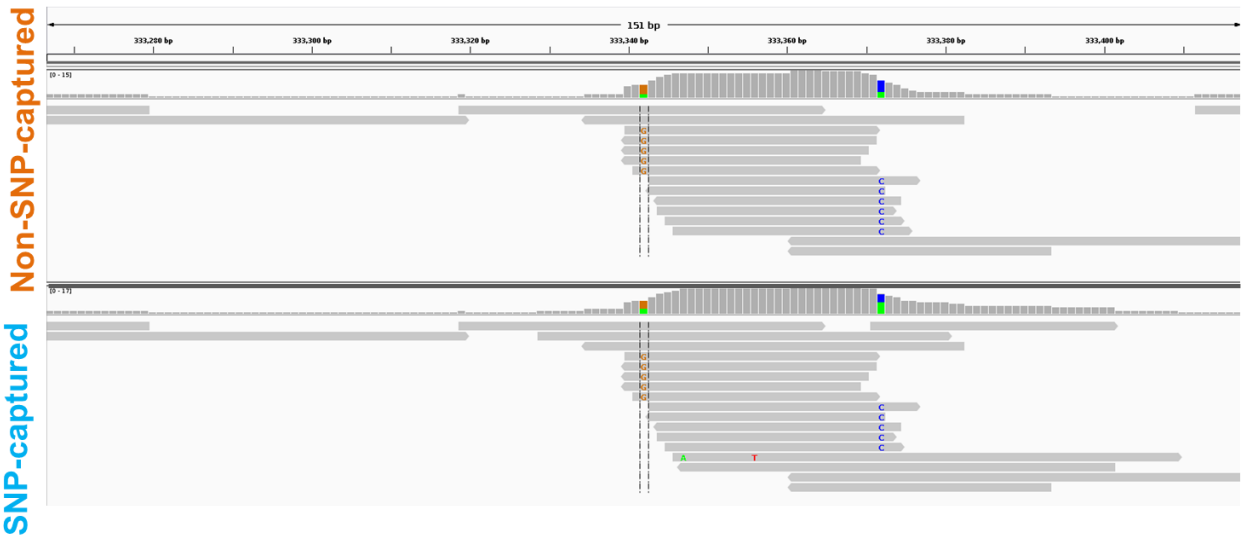



C

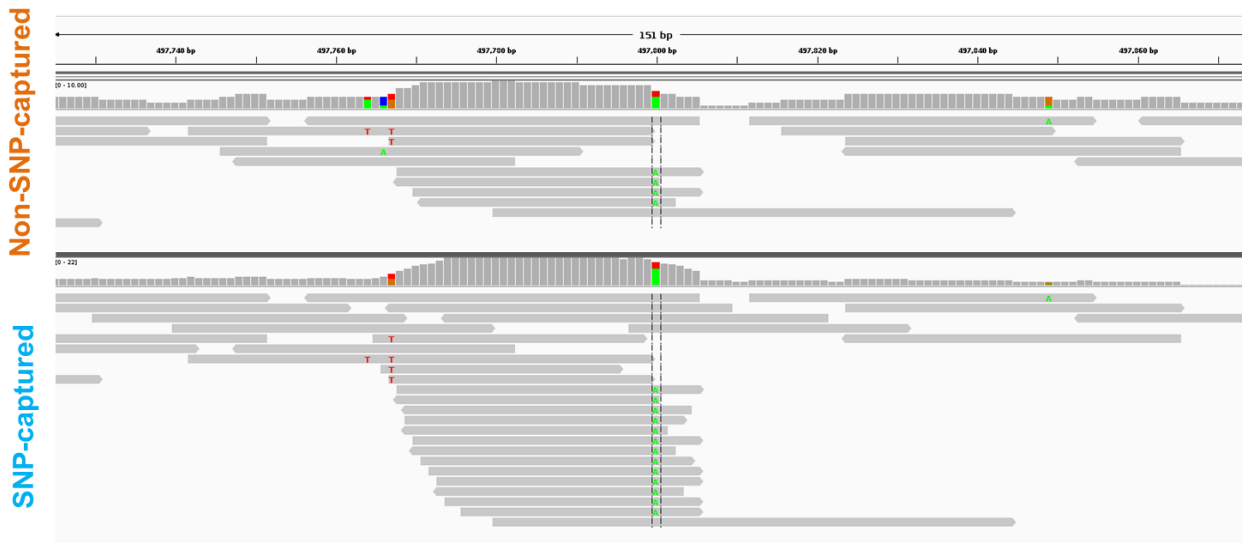

D

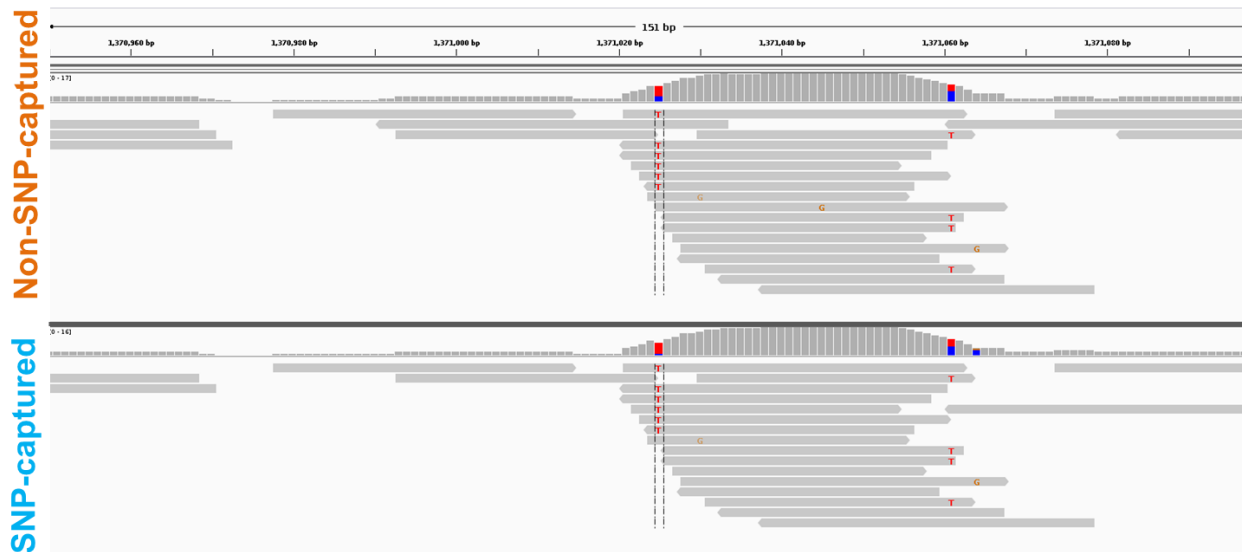

E

Non-SNP-captured

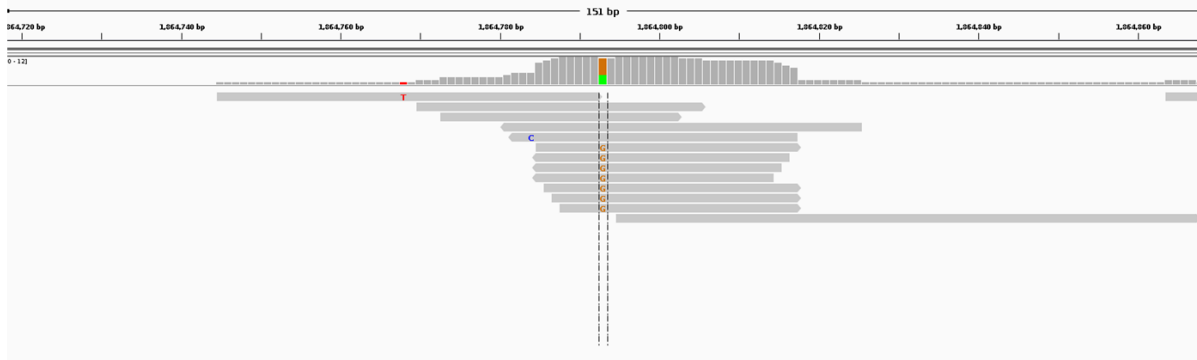

SNP-captured

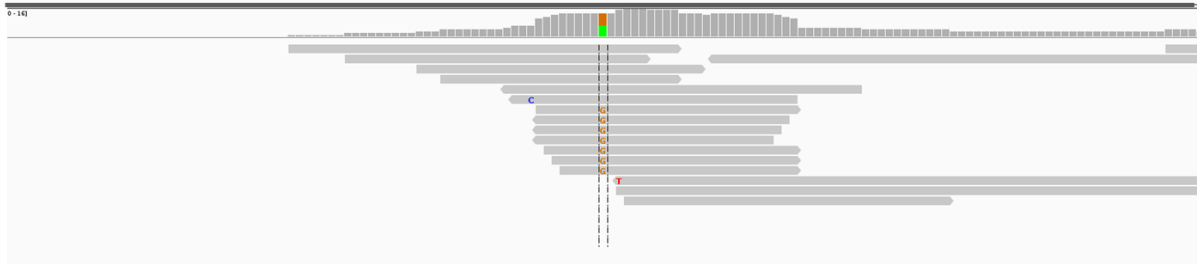

F

Non-SNP-captured

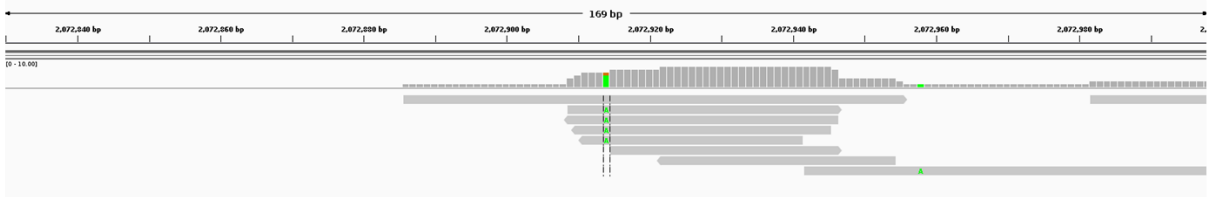

SNP-captured

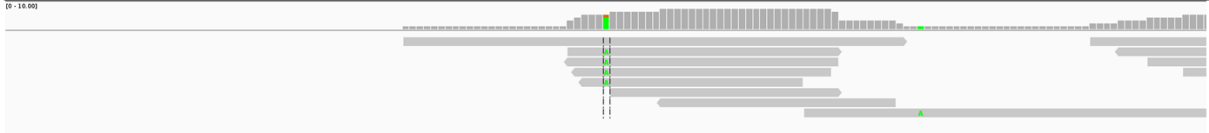

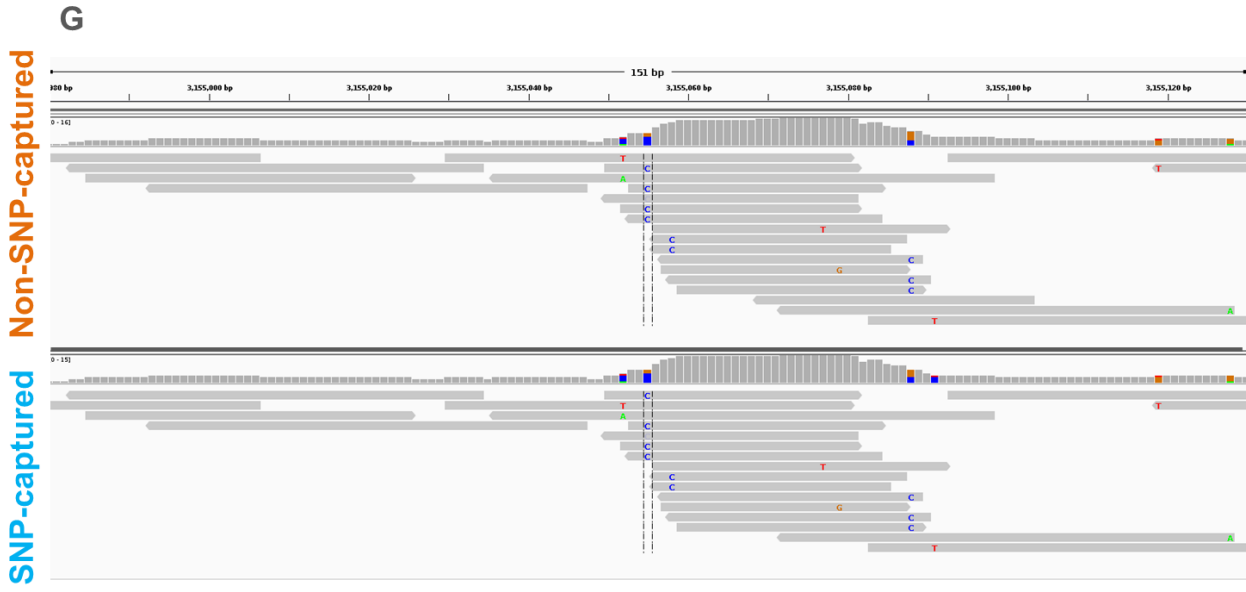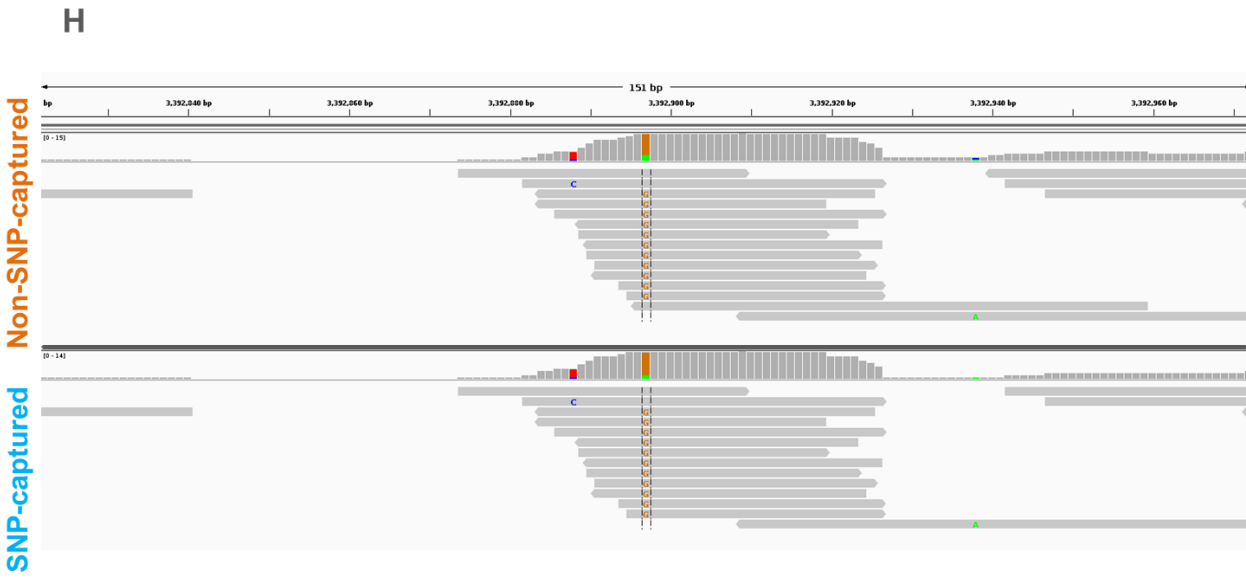

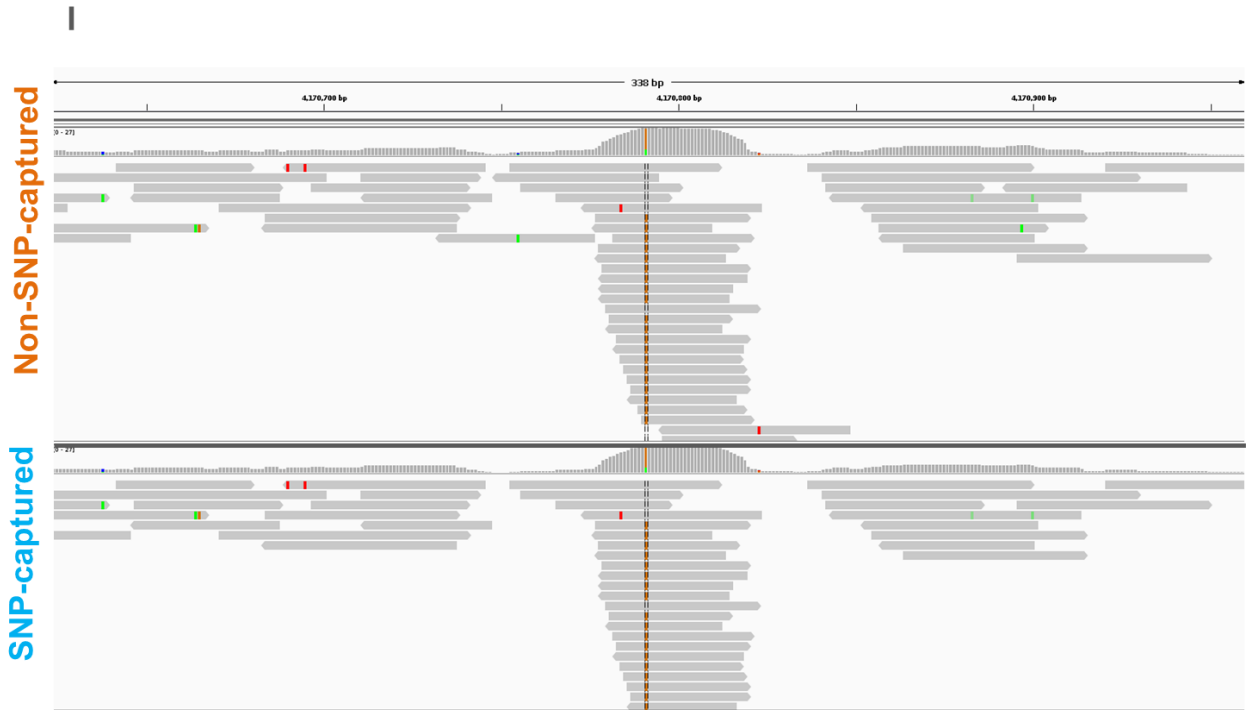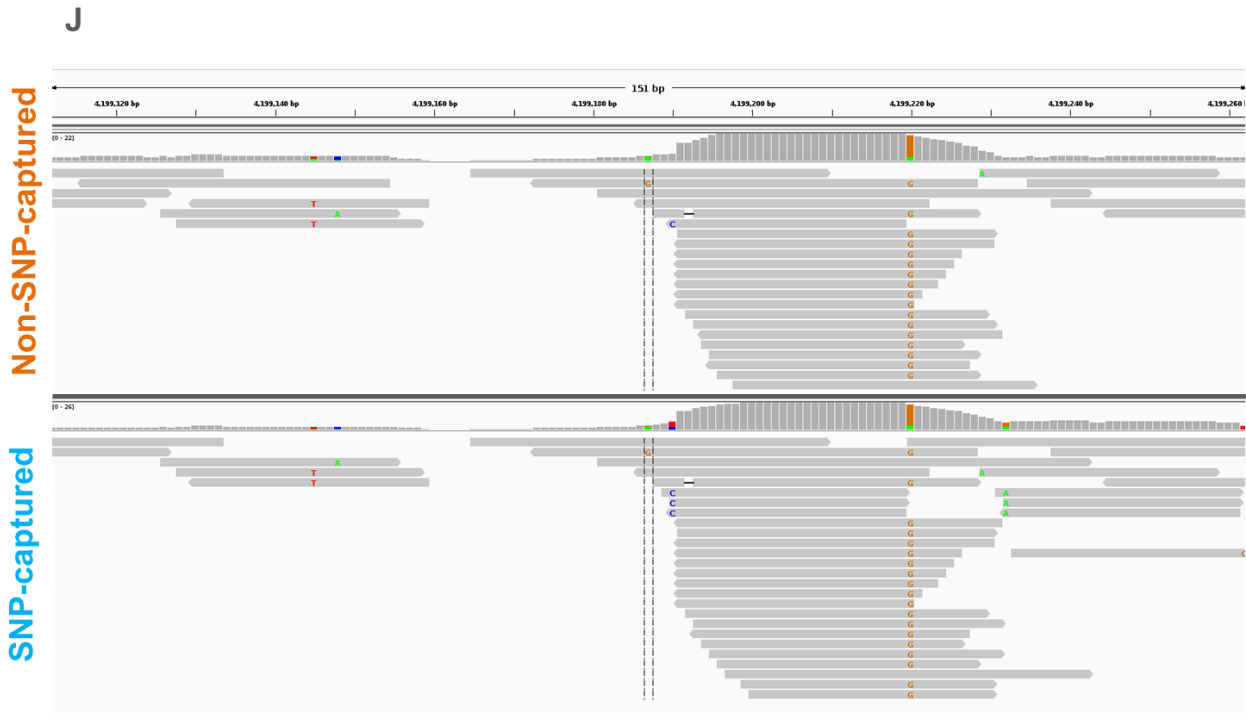

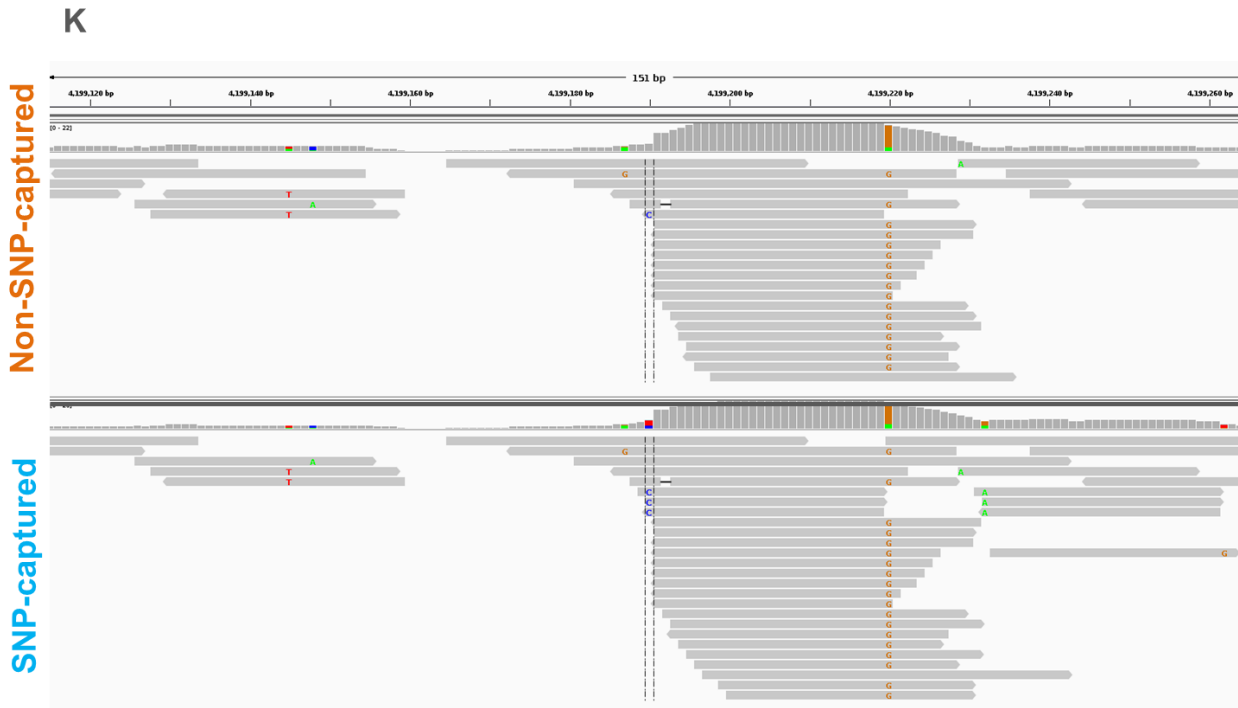

**Fig. S8 ( A-K): Visualization of the abnormal coverage peaks in the re-analyzed Aschheim SNP enriched data and non-SNP enriched data, containing potential false positive SNPs called by *Wagner et al. 2014*.** Reads were mapped to the CO92 reference with sensitivity of 0.1 and minimum mapping quality of 30 and visualized on IGV gene browser. Upper bend shows coverage plot for the region corresponding to the genome beneath. Upper scale shows position (bp) in reference sequence. Dotted line marks the SNP.

A

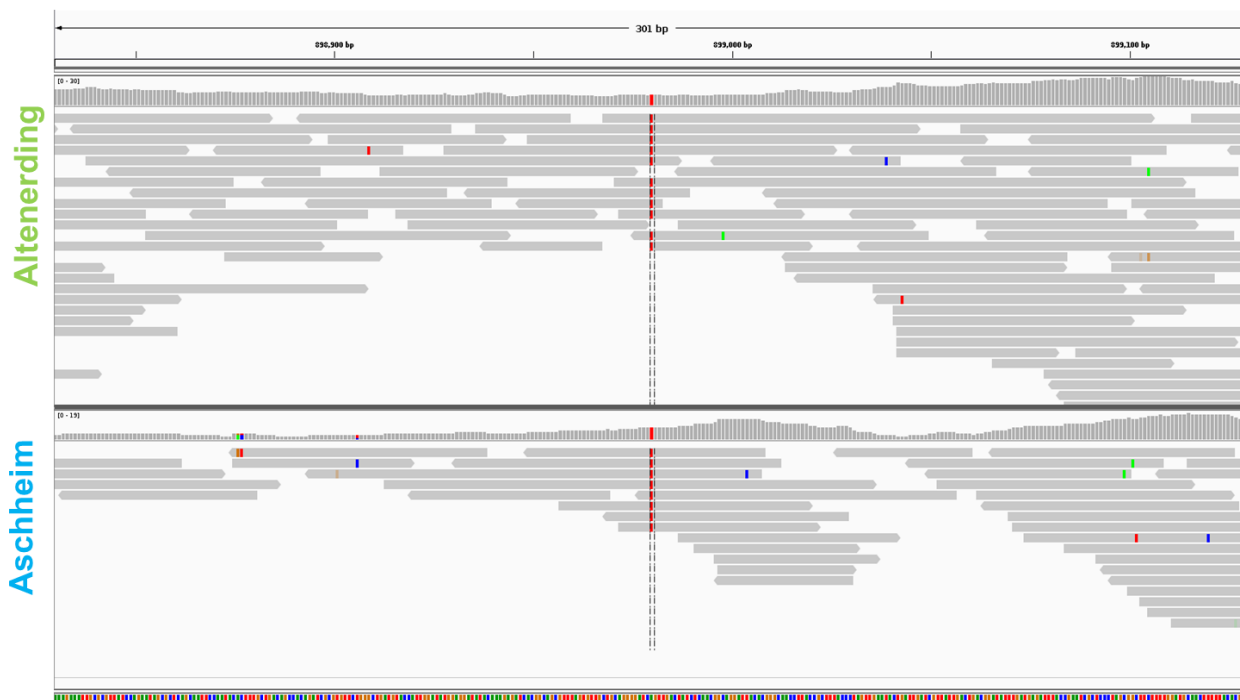

B

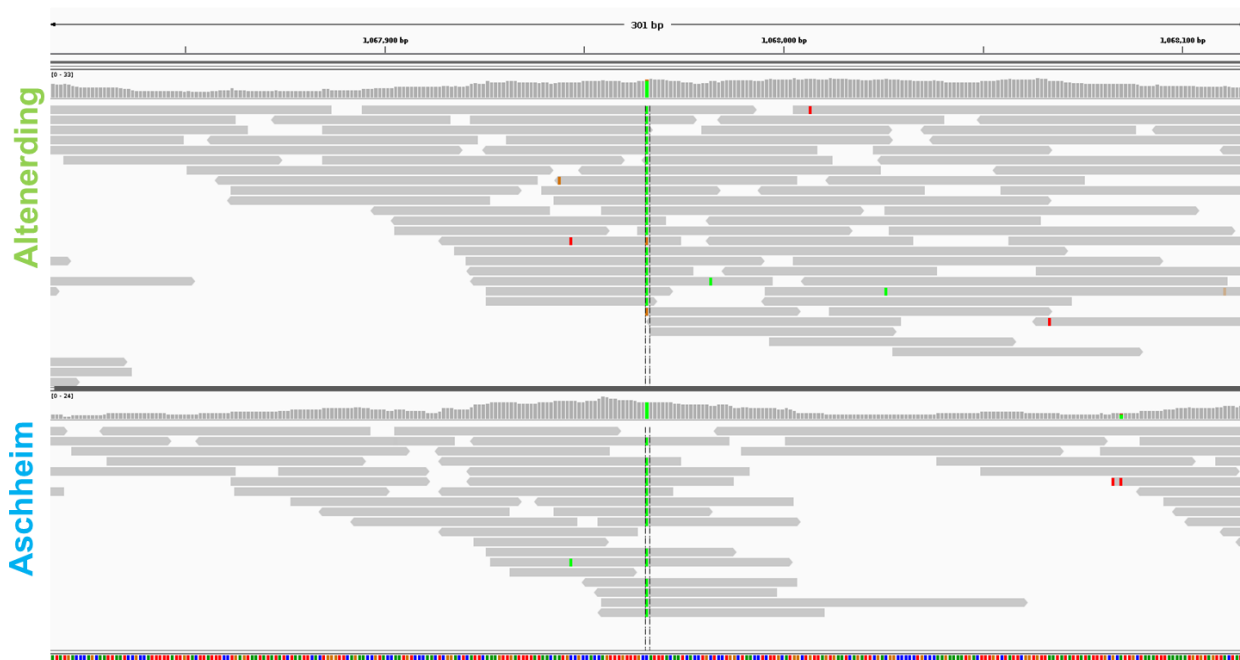

C

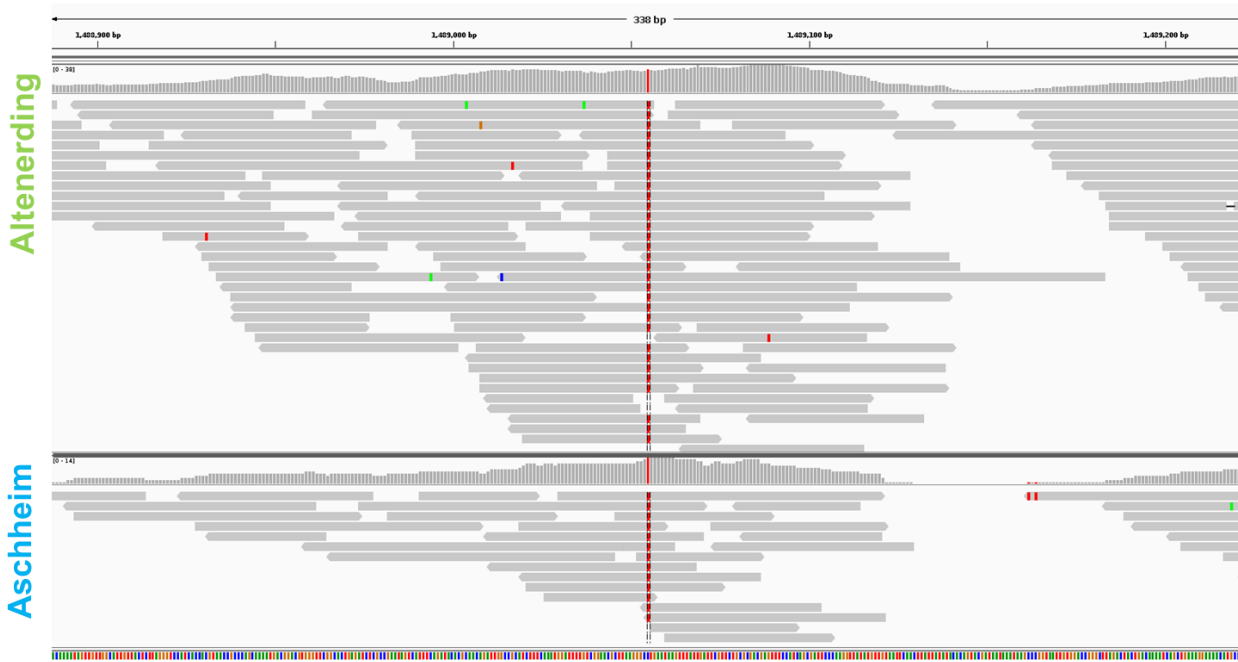

D

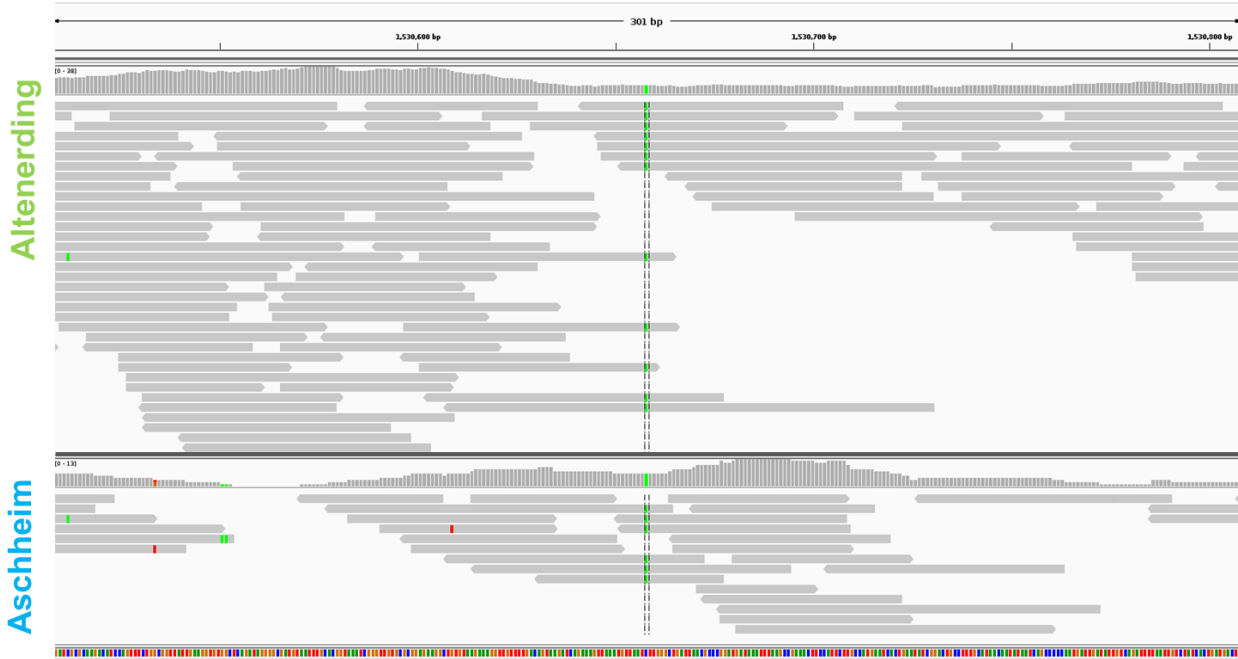

E

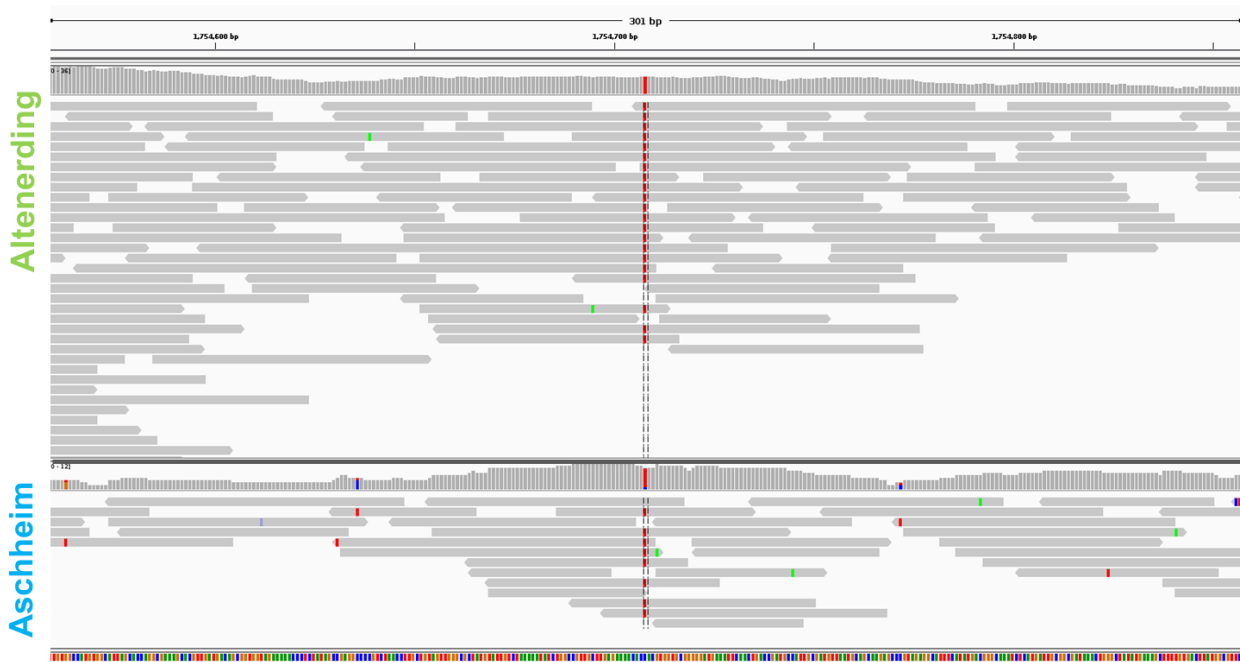

F

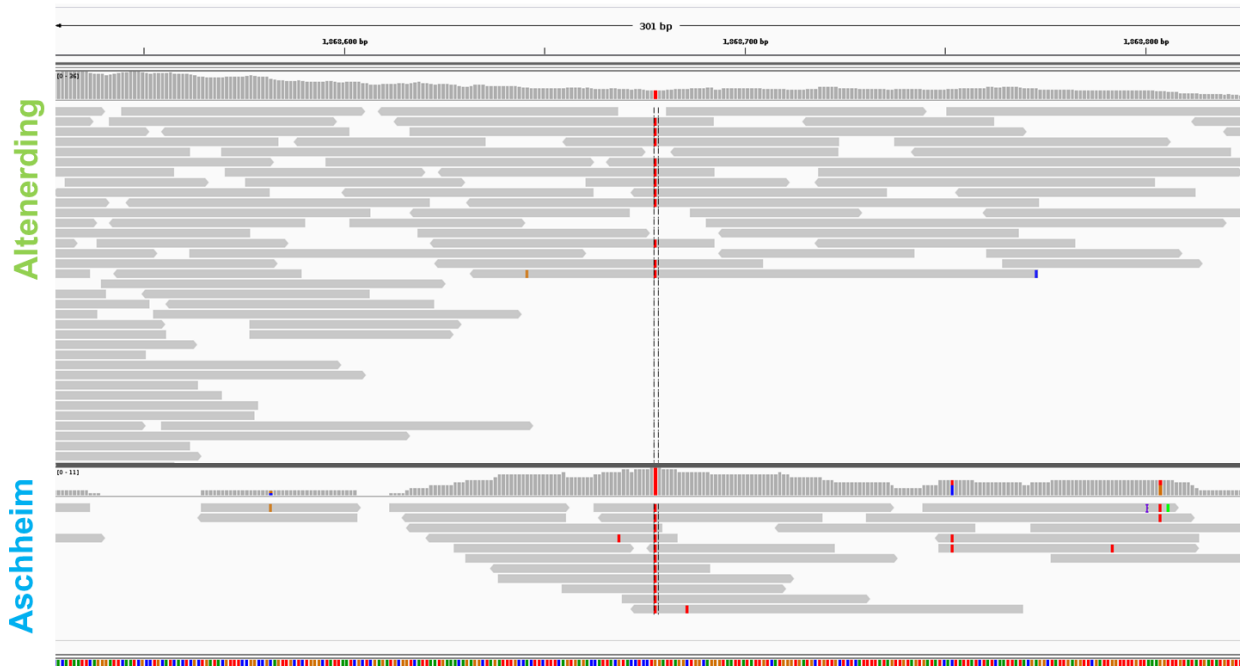



G

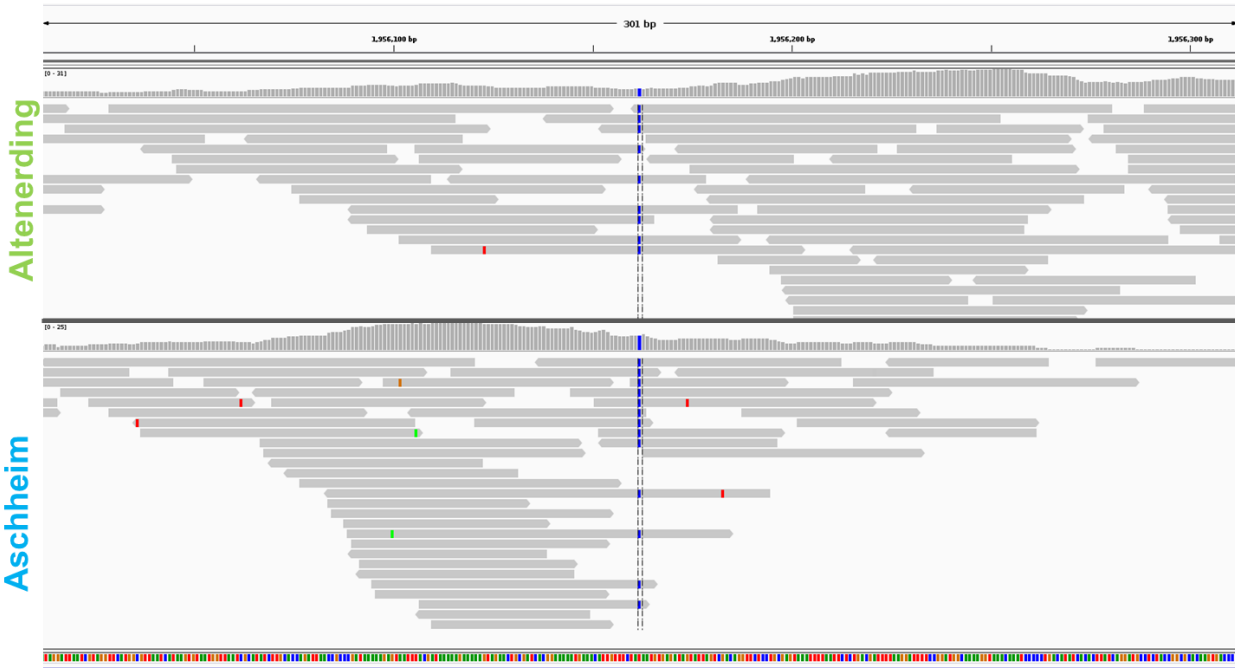

H

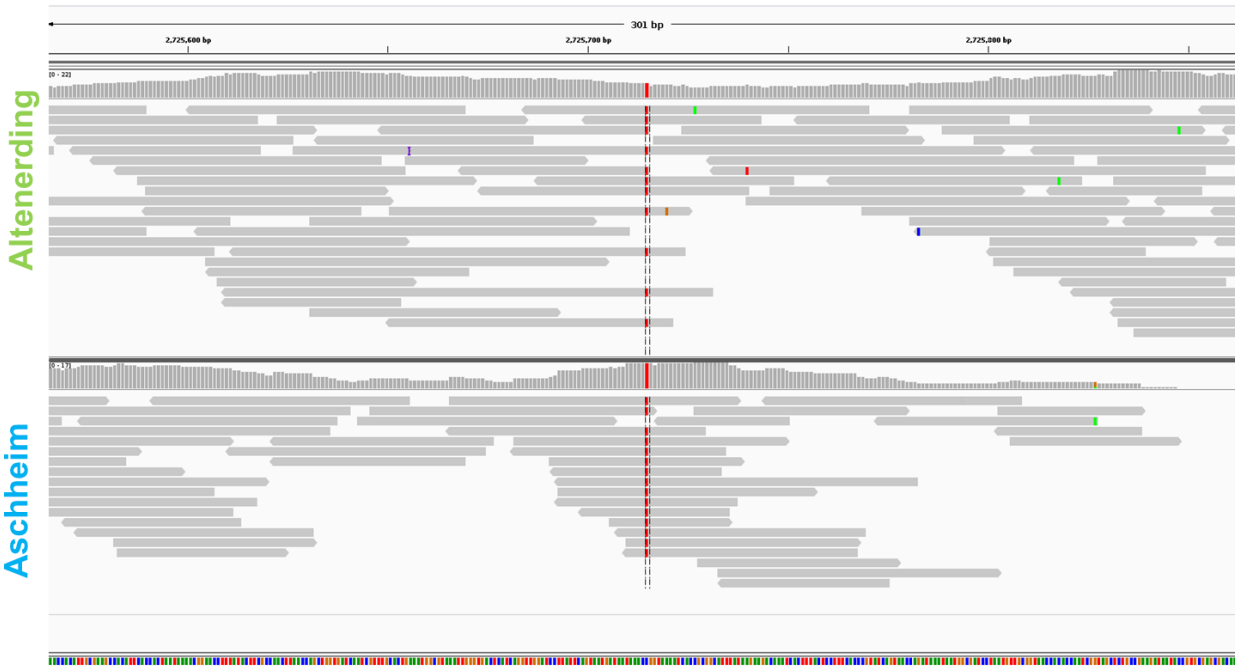

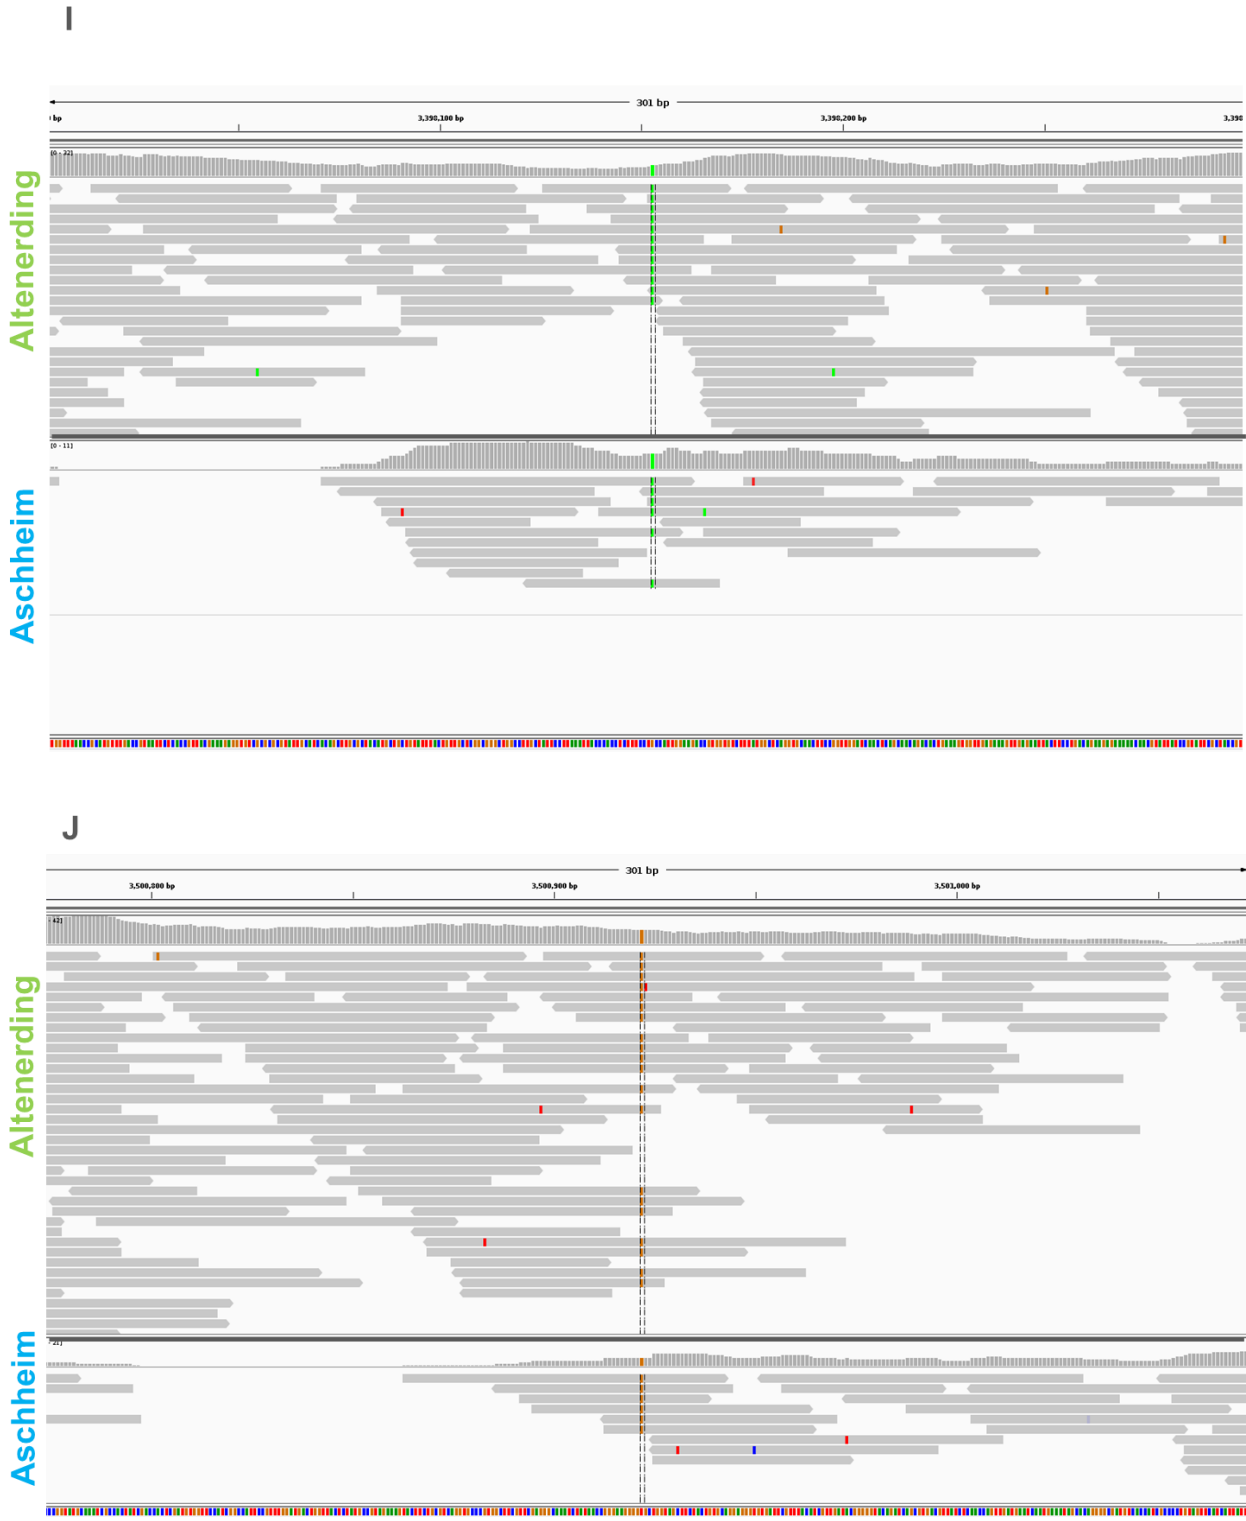

**Fig. S9 (A-J): Visualization of 10 positions containing true SNPs called for the re-analyzed Aschheim genome as well as for the Altenerding genome. The positions were randomly picked to represent visual patterns consistent with the set criteria for SNP calling and with a**

relative even coverage, in contrast with the pattern of the abnormal coverage peaks shown in figures S4 and S5. Reads were mapped to the CO92 reference with sensitivity of 0.1 and minimum mapping quality of 30 and visualized on IGV gene browser. Upper bend shows coverage plot for the region corresponding to the genome beneath. Upper scale shows position (bp) in reference sequence. Bottom sequence shows the 150 bp in the CO92 reference. Dotted line marks the SNP. **A:** position 898980 (A to T) **B:** position 1067966 (C to A) **C:** position 1489055 (C to T) **D:** position 1530658 (C to A) **E:** position 1754708 (C to T) **F:** position 1868678 (G to T) **G:** position 1956162 (T to C) **H:** position 2725715 (C to T) **I:** position 3398153 (G to A) **J:** position 3500922 (T to G).



**C**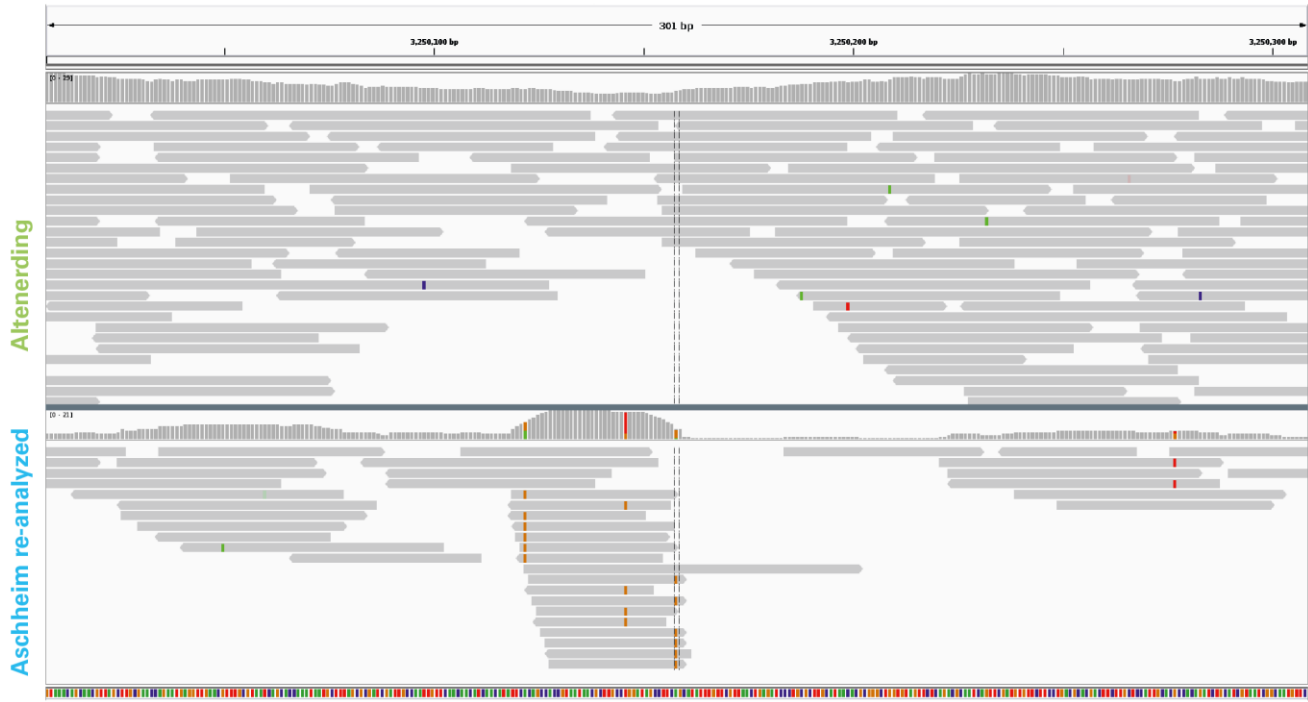**D**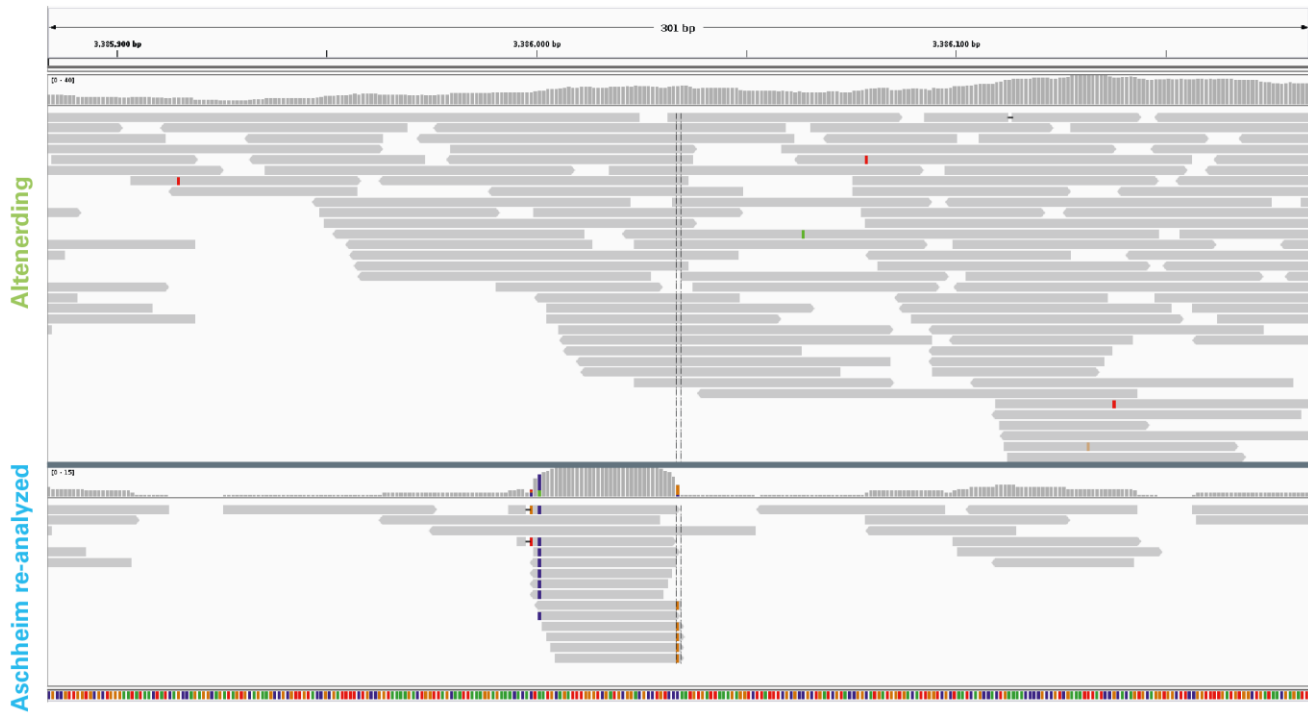

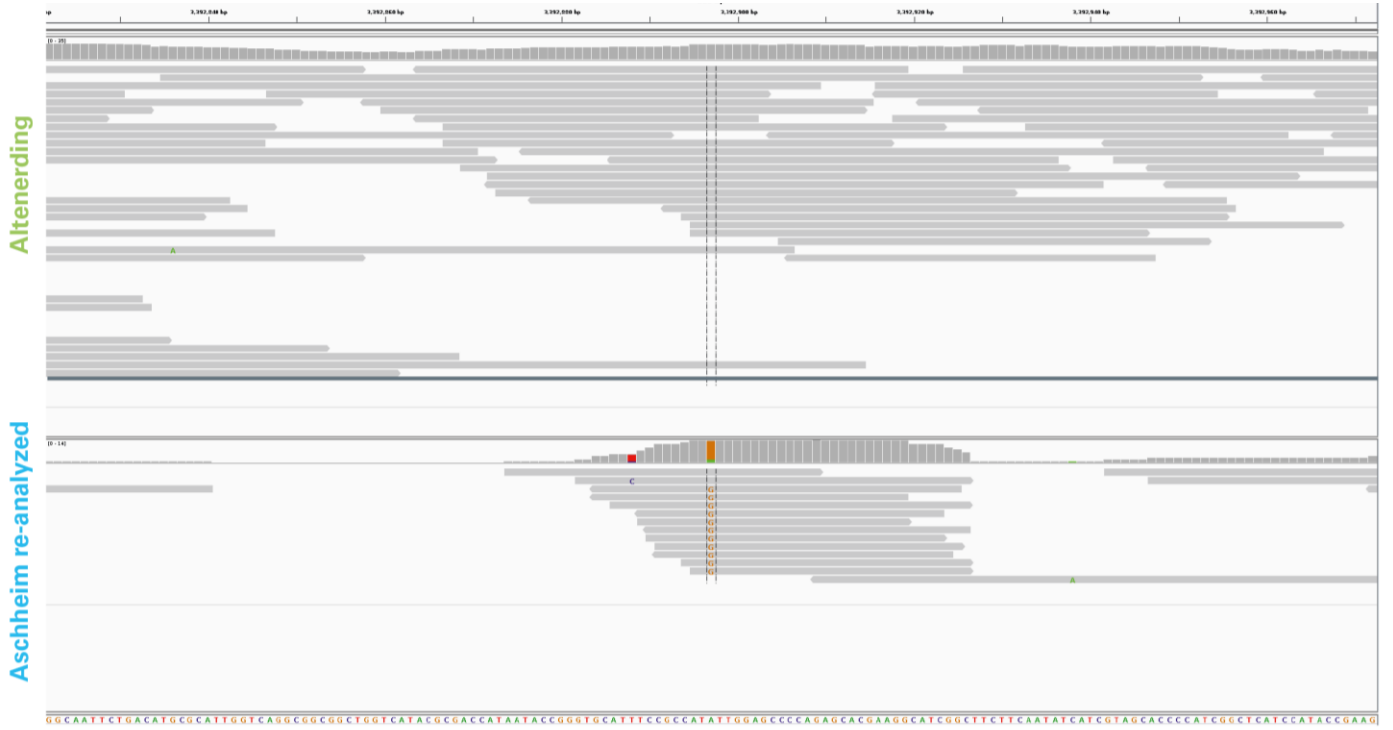

**F**

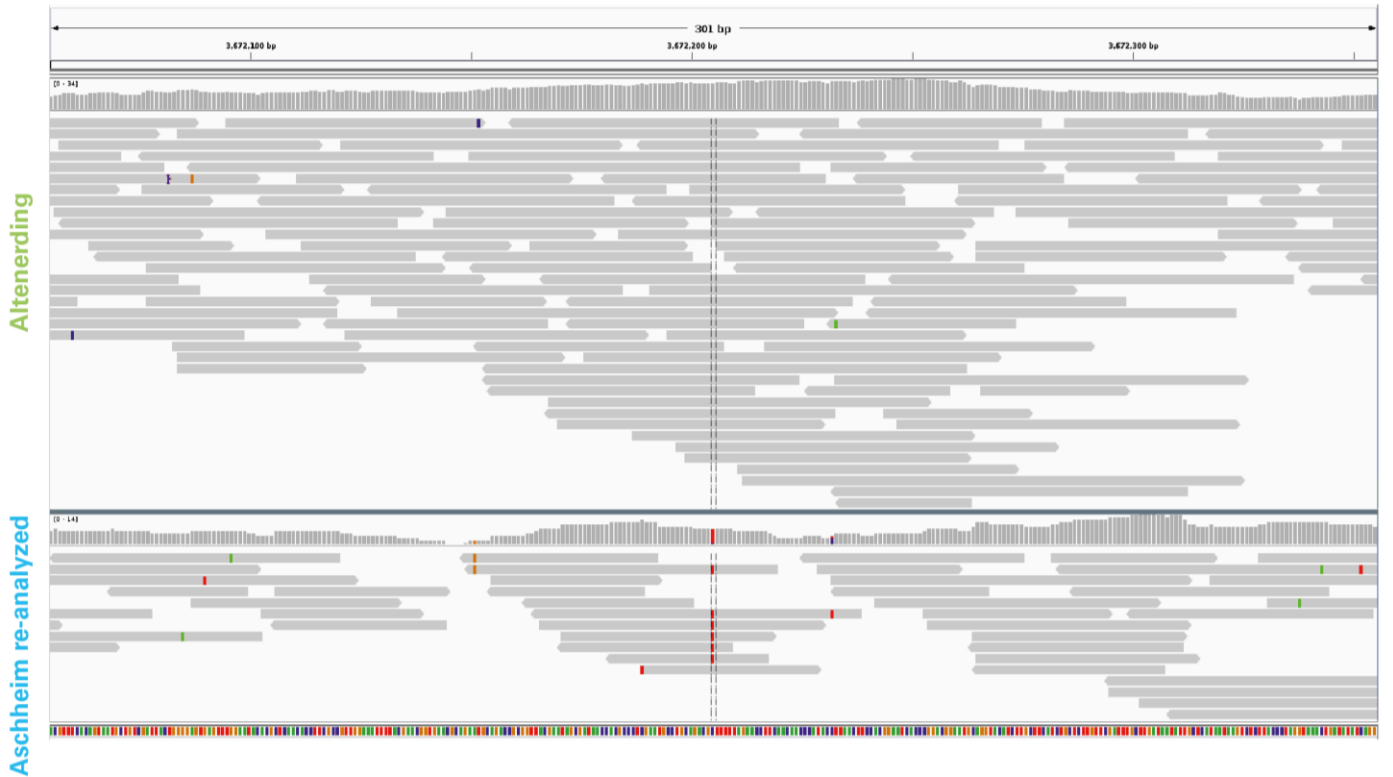

**G**

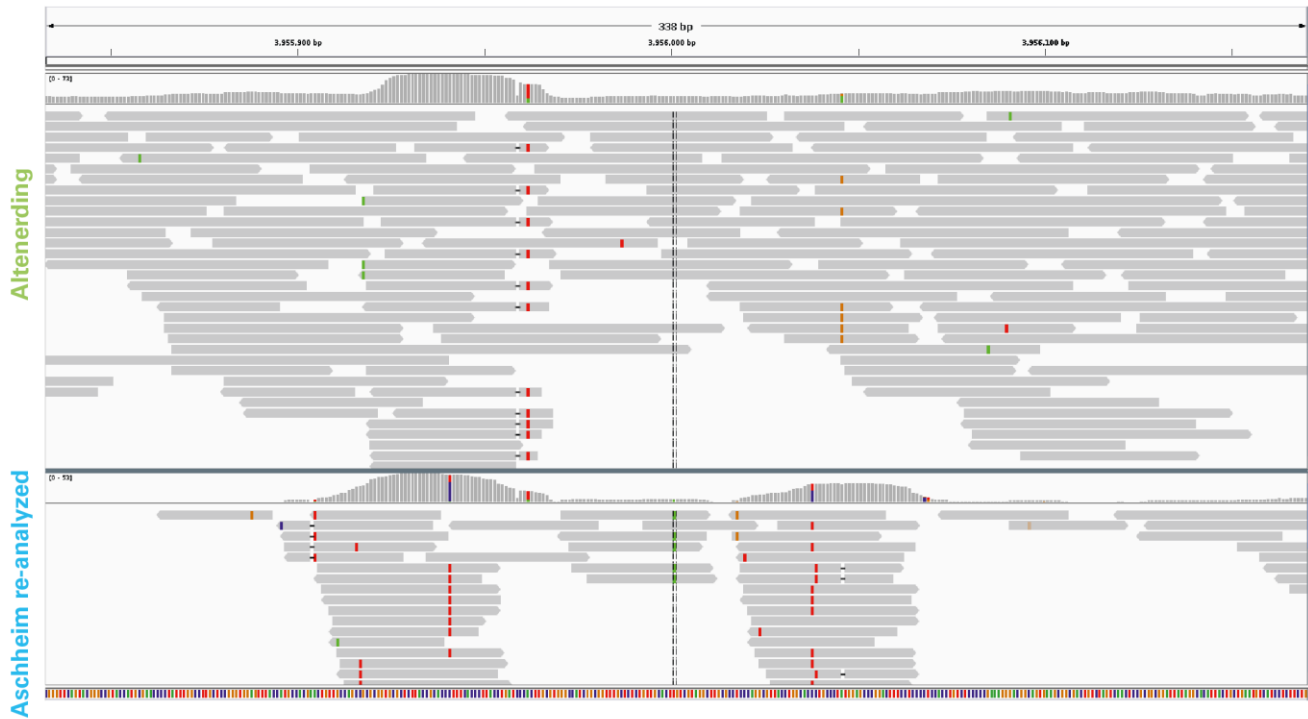

**H**

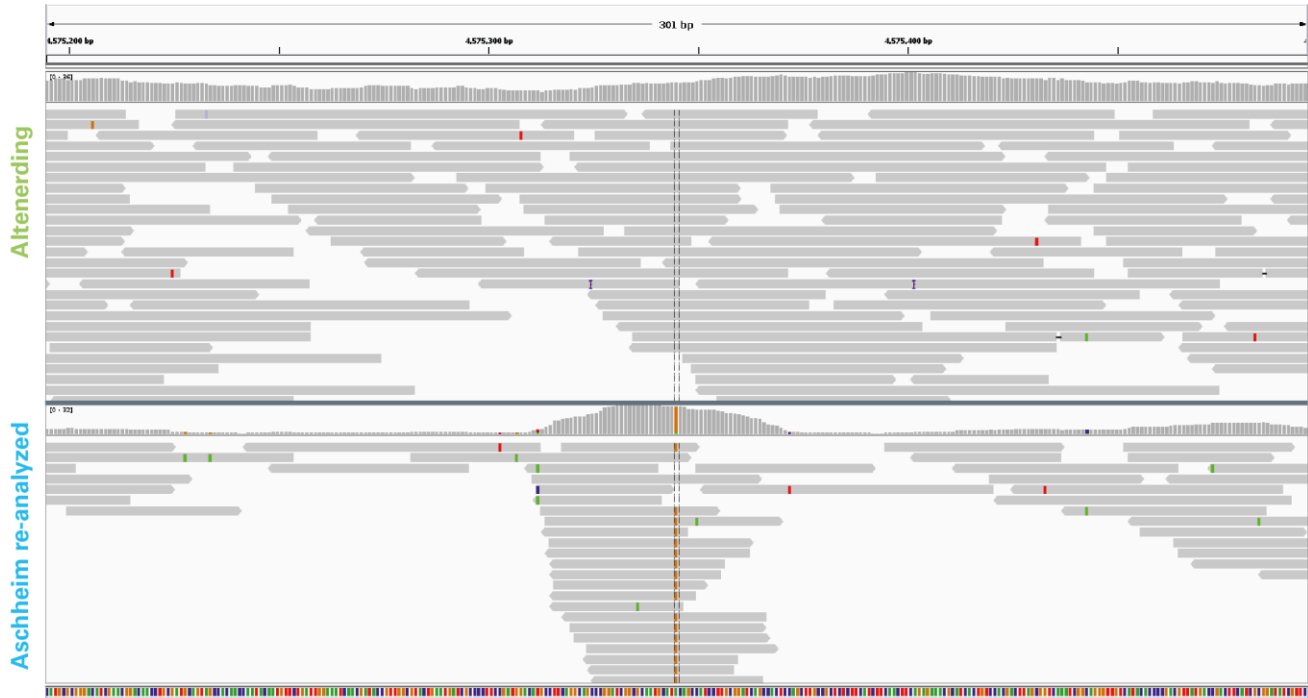

**Fig.S10 (A-H): Visualization of positions containing potential false positive SNPs specifically derived in the re-analyzed Aschheim.** Reads were mapped to the CO92 reference with sensitivity of 0.1 and minimum mapping quality of 30 and visualized on IGV gene browser. Upper bend shows coverage plot for the region corresponding to the genome beneath. Upper scale shows position (bp) in reference sequence. Bottom sequence shows the 150 bp in the CO92 reference. Dotted line marks the false positive SNP.

**(A) Position 362357:** Re-analysis of the Aschheim raw data shows 89 % variant frequency for the “C” to “T” variant at the position. The “T” variants are located in a region with an abnormal cover peak. The Altenerding mapping shows even 21 fold coverage in the region and a 100 % variant frequency that supports the “C” variant (identical to reference). This SNP was removed from final analysis by *Wagner et al.*, 2014 following a visual inspection.

**(B) Position 1371025:** Re-analysis of the Aschheim raw data shows 86 % variant frequency for the “C” to “T” variant called as SNP by Wagner et al. Variant frequency is lower than the minimum variant frequency of 95 % set by Wagner et al. The “T” variants are located at end of reads in a region with an abnormal peak in coverage. The Altenerding mapping shows even 18 fold coverage in the region and a 100 % variant frequency that supports the “C” variant (identical to reference).

**(C) Position 3250158:** Re-analysis of the Aschheim raw data shows 86 % variant frequency for the “A” to “G” variant at the position. The “G” variants are located at end of reads in a region with an abnormal cover peak. The Altenerding mapping shows even 11 fold coverage in the region and a 100 % variant frequency that supports the “A” variant (identical to reference). This SNP was not called by *Wagner et al.*, 2014.

**(D) Position 3386034:** Re-analysis of the Aschheim raw data shows 83 % variant frequency for the “C” to “G” variant at the position. The “G” variants are located at end of reads in a region with an abnormal cover peak. The Altenerding mapping shows even 24 fold coverage in the region and a 100 % variant frequency that supports the “C” variant (identical to reference). This SNP was not called by *Wagner et al.*, 2014.



**(E) Position 3392897:** Re-analysis of the Aschheim raw data shows 85 % variant frequency for the A to G variant called as SNP by Wagner et al. Variant frequency is lower than the minimum variant frequency of 95 % set by Wagner et al. The reads containing the “G” variants are located in a region with an abnormal peak in coverage. The Altenerding mapping shows even 22 fold coverage in the region and a 100 % variant frequency that supports the “A” variant (identical to reference).

**(F) Position 3672205:** Re-analysis of the Aschheim raw data shows 86 % variant frequency for the “C” to “T” variant at the position. The “T” variants are located in a region with an abnormal cover peak. The Altenerding mapping shows even 28 fold coverage in the region and a 100 % variant frequency that supports the “C” variant (identical to reference). This SNP was not called by *Wagner et al.*, 2014.

**(G) Position 3956001:** Re-analysis of the Aschheim raw data shows 83 % variant frequency for the “T” to “A” variant at the position. The “A” variants are located between two abnormal cover peaks, in a region with high variability. The Altenerding mapping shows even 18 fold coverage in the region and a 100 % variant frequency that supports the “A” variant (identical to reference). This SNP was removed from final analysis by Wagner et al., 2014 following a visual inspection.

**(H) Position 4575345:** Re-analysis of the Aschheim raw data shows 90 % variant frequency for the “A” to “G” variant at the position. The “G” variants are located in a region with an abnormal cover peak. The Altenerding mapping shows even 23 fold coverage in the region and a 100 % variant frequency that supports the “A” variant (identical to reference). This SNP was removed from final analysis by Wagner et al., 2014 following a visual inspection.

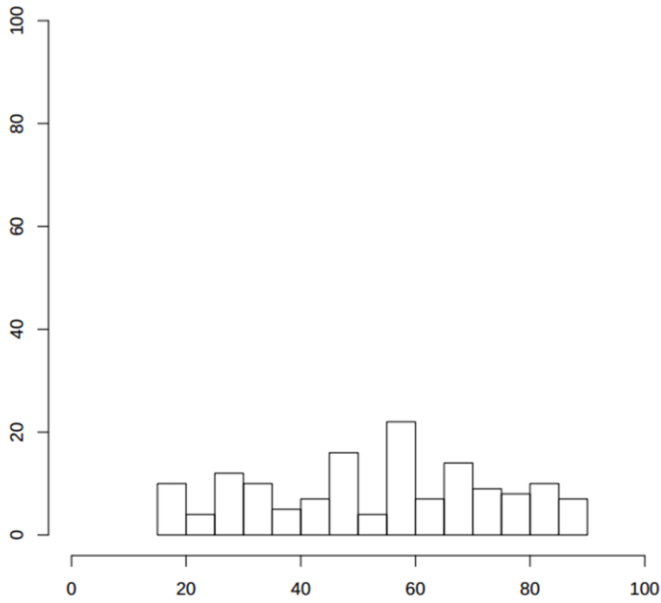

**Fig.S11: Genome-wide SNP allele frequency plot of the re-analyzed Aschheim draft genome.** The x axis indicates the frequency of reads covering a SNP position in which the SNP was detected in the re-analyzed Aschheim draft genome. The y axis indicates the number of SNP calls with the respective frequency. The observed frequencies are not showing any bimodal pattern or any other pattern that could indicate an infection with multiple strains.

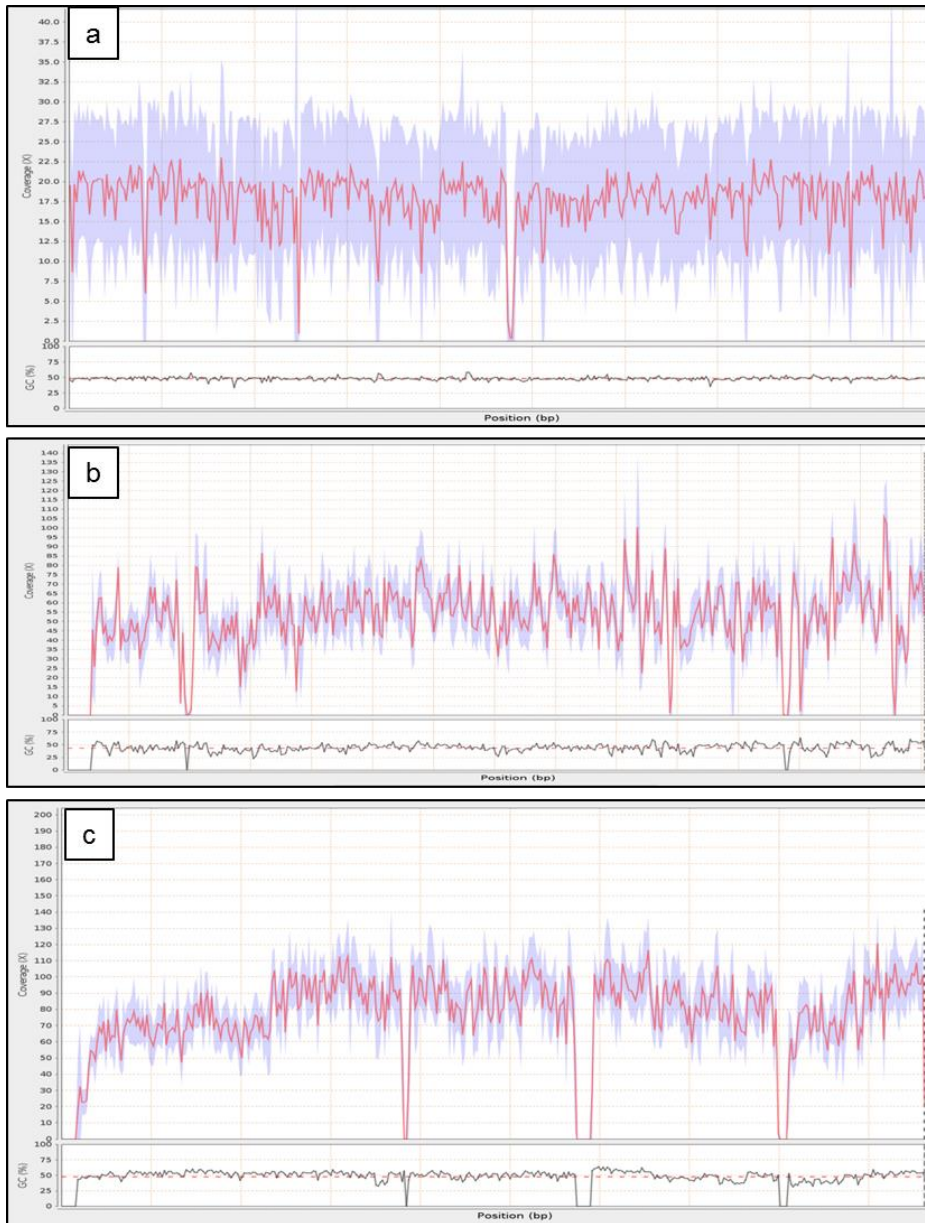

**Fig.S12: Coverage plots across the CO92 reference for the Altenerding genome.** Coverage across the reference was plotted using QualiMap version 2.1. (a) Coverage across the CO92 chromosome (NC\_003143.1). (b) Coverage across the pCD1 plasmid (NC\_003131.1). (c) Coverage across the pMT1 plasmid (NC\_003134.1). Coverage in red, percent GC content in grey and mean GC content in dashed line.

## Supplementary archaeological and historical information

The early medieval cemetery from Altenerding (also called Altenerding/Klettham) is located near Munich in southern Germany. It contains around 1450 inhumations and is therefore one of the largest early medieval cemeteries in Central Europe. Altenerding was excavated from 1966 to 1973 (Sage 1984) and was used from the second half of the fifth century until the seventh century AD (Losert and Pleterski 2003).

Within the cemetery 16 double burials and no multiple burials could be identified. Ten double burials were chosen randomly for screening of *Y. pestis* presence (Table S9). All of them contained grave furnishings, mostly a set of brooches and other dress ornaments for women and a combination of weapons for men, as is typical to this time period (Sage 1984). This is also true for the plague-positive individuals in the double-burial 1175/1176. Here, a 25- to 30-year old woman was laid to rest together with a 20 to 25 year old male. The dead woman (1175) was buried with a variety of clothes and jewels (Fig. 1C) typical of the middle of the 6<sup>th</sup> century, including an iron arm ring; a belt with bronze belt buckle; a chatelaine with antler pendant; Roman brooches; iron keys; chained links and scales; a knife; a fragment of La Tène glass arm ring; a necklace of glass and amber beads and fragments of a blue Roman glass vessel. She wore a pair of garnet disk fibulas whose typology has been dated between ~530 and ~570 (Vielitz 2003) and among other ornaments she was equipped with a so-called Hercules- or Donar club amulet, which probably expresses a special hope for growth and fertility (Losert and Pleterski 2003). Due to her young age only minor expressions of degenerative lesions in the great joints and the spine are visible on the bones. However, the orbital roofs show porotic lesions on the bone surface (*cribra orbitalia*). These kinds of lesions are rather unspecific and can occur in a variety of diseases (Walker et al. 2009).

The young man was buried without weapons, but a bag hanging on a belt could be reconstructed as containing an iron knife, a lighter and nails (Fig. 1D). Despite the young age of the individual some degenerative lesions are visible in the spine including Schmorl's nodes. The right orbital roof shows porotic lesions on the bone surface (the left orbital roof is missing). Both tibiae exhibit an extensive inflammation of the bone

surface (periostitis). Both symptoms are rather unspecific and can be connected to different kinds of infectious diseases or anemia.

Wooden traces indicate the existence of two coffins or wooden planking in the grave. This is a further sign that the dead were carefully arranged. Furthermore, both individuals were buried with rather expensive clothes and jewels. This indicates that the victims had been dressed and prepared carefully for their funeral. Burial rites, which probably also included washing and public laying out of the body seem to have been conducted also for these plague victims. The same has been noted in the neighboring Aschheim cemetery (Gutsmiedl-Schümann et al. 2010).

No historical record has yet been adduced that mentions the impact of the Justinianic Pandemic in this region. In fact, an 8<sup>th</sup>-century historian who used some reliable early sources, with respect to the wave dated ~565-571 states explicitly that this outbreak went as far as this region, but stayed within "Italy": "In his [Narses] time, the greatest plague emerged, particularly in the province of Liguria.... And what is more, these evils occurred only within Italy up to the region of the Alamannian and Bavarian peoples, to the Romans alone."(Bethmann and Waitz 1878)

## References

- Bethmann L and Waitz G. 1878. Paul the Deacon: History of the Lombards 2.4. Monumenta Germaniae historica, Scriptorum rerum Langobardicarum: Hanover 74.3-26 (translation by McCormick).
- Gutsmiedl-Schümann D, Greipl EJ, Sommer S, für Denkmalpflege BL. 2010. Das frühmittelalterliche gräberfeld Aschheim-bajuwarenring. Lassleben.
- Losert H and Pleterski A. 2003. Das frühmittelalterliche gräberfeld von Altenerding in Oberbayern und die "ethnogenese" der Bajuwaren. Scîpvaz-Verlag.
- Sage W. 1984. Das reihengräberfeld von Altenerding in Oberbayern: Katalog der Anthropologischen und Archäologischen funde und befunde. Gebrüder Mann Verlag.
- Vielitz K. 2003. Die granatscheibenfibeln der merowingerzeit. M. Mergoil.

- Wagner DM, Klunk J, Harbeck M, Devault A, Waglechner N, Sahl JW, Enk J, Birdsell DN, Kuch M, Lumibao C. 2014. *Yersinia pestis* and the Plague of Justinian 541–543 AD: a genomic analysis. *The Lancet Infectious Diseases* 14 (4):319-26.
- Walker PL, Bathurst RR, Richman R, Gjerdrum T, Andrushko VA. 2009. The causes of porotic hyperostosis and *Cribra Orbitalia*: A reappraisal of the iron deficiency anemia hypothesis. *Am J Phys Anthropol* 139(2):109-25.
